# Supplementary material
Source: MDPI journal article supplement (https://www.mdpi.com/2075-5309/13/2/433)
Supplement: s1 [file s1]

# **REVIEW OF PARAMETERS MEASURED TO CHARACTERIZE CLASSROOMS' INDOOR ENVIRONMENTAL QUALITY**

Minh Tien Tran<sup>1,2, \*</sup>, Wenjuan Wei<sup>1</sup>, Claire Dassonville<sup>1</sup>, Christophe Martinsons<sup>1</sup>, Pascal Ducruet<sup>1</sup>, Corinne Mandin<sup>1</sup>, Valérie Héquet<sup>2</sup>, Pawel Wargocki<sup>3</sup>

1: Scientific and Technical Center for Building (CSTB), Health and Comfort Department, French Indoor Air Quality Observatory (OQAI), Marne-la-Vallée, France

2: IMT Atlantique, CNRS, GEPEA, UMR 6144, Nantes Cedex 3, France

3: International Centre for Indoor Environment and Energy, Department of Environmental and Resource Engineering (DTU SUSTAIN), Technical University of Denmark (DTU), Denmark

\*Corresponding author: Minh Tien Tran, [minh-tien.tran@cstb.fr](mailto:minh-tien.tran@cstb.fr)

## **1 Tables**

**1.1 Table S1: Measurements of air temperature (°C) in schools in Europe and North America since 2010**

| References<br>Location                       | Period (year)           | Type of<br>schools | Number<br>of schools | Total number<br>of samples | Type of<br>ventilation                          | Occupancy | Measurement protocol                                                                                                                                                   | Air temperature (°C) |     |            |
|----------------------------------------------|-------------------------|--------------------|----------------------|----------------------------|-------------------------------------------------|-----------|------------------------------------------------------------------------------------------------------------------------------------------------------------------------|----------------------|-----|------------|
|                                              |                         |                    |                      |                            |                                                 |           |                                                                                                                                                                        | Min                  | Max | AM ±<br>SD |
| Aguilar et al.<br>2022 [1]                   | Winter 2021             | University         | 1                    | 9                          | Window<br>opening                               | Yes       | Hygrometer sensor, 10<br>minutes before lecture<br>start.<br>3 sensors per room, at 0.6<br>meter                                                                       | 15                   | 28  | 21 ± 3.9   |
| Campano-<br>Laborda et al.<br>2020 Spain [2] | Winter 2020             | Secondary          | 8                    | 564                        | Window<br>opening                               | Yes       | Hygrometer sensor<br>30 minutes continuously<br>Two times per day, 1 in<br>early morning and 1 in<br>midmorning break<br>12 sensors per room, at 0.6<br>and 1.7 meters | N/A                  | N/A | 21 ± 1.4   |
| Campano-<br>Laborda et al.<br>2020 Spain [2] | Midseason<br>2020       | Secondary          | 8                    | 564                        | Window<br>opening                               | Yes       | Hygrometer sensor<br>30 minutes continuously<br>Two times per day, 1 in<br>early morning and 1 in<br>midmorning break<br>12 sensors per room, at 0.6<br>and 1.7 meters | N/A                  | N/A | 22 ± 2.1   |
| Harcarova et al.<br>2020 Slovakia<br>[3]     | Winter 2020             | Elementary         | 1                    | 1                          | Window<br>opening                               | Yes       | Hygrometer sensor<br>1 hour, at 1.1 meters                                                                                                                             | 22                   | 23  | 22 ± 0.2   |
| Harcarova et al.<br>2020 Slovakia<br>[3]     | Winter 2020             | Elementary         | 1                    | 1                          | Window<br>opening                               | Yes       | Hygrometer sensor<br>1 hour, at 1.1 meters                                                                                                                             | 22                   | 25  | 24 ± 0.8   |
| Langer et al.<br>2020 Sweden<br>[4]          | October -<br>March 2017 | Elementary         | 10                   | 10                         | Mechanical<br>ventilation<br>Windows<br>opening | Yes       | Hygrometer sensor<br>1 week continuous<br>2 minutes interval                                                                                                           | 22                   | 24  | N/A        |

| References<br>Location                     | Period (year)                   | Type of<br>schools     | Number<br>of schools | Total number<br>of samples | Type of<br>ventilation | Occupancy | Measurement protocol                                                                              | Air temperature (°C)                                                                                                          |     |            |
|--------------------------------------------|---------------------------------|------------------------|----------------------|----------------------------|------------------------|-----------|---------------------------------------------------------------------------------------------------|-------------------------------------------------------------------------------------------------------------------------------|-----|------------|
|                                            |                                 |                        |                      |                            |                        |           |                                                                                                   | Min                                                                                                                           | Max | AM ±<br>SD |
| Papadopoulos et al. 2020 Greece [5]        | December 2019                   | University             | 1                    | 10                         | Window opening         | Yes       | Hygrometer sensor<br>30 minutes continuously<br>3 days, with height ranged from 0.5 to 2.5 meters | 18                                                                                                                            | 26  | 23         |
| Papadopoulos et al. 2020 Greece [5]        | December 2019                   | University             | 1                    | 10                         | Window opening         | Yes       | Hygrometer sensor<br>30 minutes continuously<br>3 days, with height ranged from 0.5 to 2.5 meters | 18                                                                                                                            | 24  | 21         |
| Ahmed et al. 2019 Finland [6]              | Heating and cooling season 2019 | Daycare and elementary | 1                    | 7                          | HVAC*                  | Yes       | Hygrometer sensor<br>1 month continuously 10 minutes interval                                     | All buildings achieved the highest quality of thermal condition (22 °C ± 1 in heating season and 24 °C ± 1 in cooling season) |     |            |
| Brdaric et al. 2019 Croatia [7]            | February - May 2014             | Elementary             | 20                   | 20                         | Window opening         | Yes       | Hygrometer sensor<br>1 week<br>1 minute interval                                                  | 20                                                                                                                            | 23  | 21         |
| Papazoglou et al. 2019 Greece [8]          | January 2016                    | University             | 1                    | 1                          | Window opening         | Yes       | Air temperature probe<br>90 minutes<br>10 second time interval, at 1.3 meters                     | 17                                                                                                                            | 20  | 20         |
| Simanic, et al. 2019 Sweden [9]            | Heating season 2018             | Elementary             | 7                    | 145                        | HVAC*                  | Yes       | Hygrometer sensor<br>1 week continuously<br>7h30 to 16h00                                         | 22                                                                                                                            | 24  | NA         |
| Simanic, et al. 2019 Sweden [9]            | Cooling season 2018             | Elementary             | 2                    | 3                          | HVAC*                  | Yes       | Hygrometer sensor<br>1 week continuously<br>7h30 to 16h00                                         | N/A                                                                                                                           | N/A | 23 ± 3     |
| Buratti et al. 2018 Italy [10]             | Spring and Autumn 2015          | University             | 7                    | 7                          | Mechanical ventilation | Yes       | Microclimatic station in compliance with ISO 7726<br>1 week continuous, at 1.1 meters             | N/A                                                                                                                           | N/A | 24         |
| Vornanen-Winqvist et al. 2020 Finland [11] | April to September 2016         | Secondary              | 1                    | 2                          | HVAC*                  | Yes       | Hygrometer sensor<br>1 week continuously, at 0.6 meter                                            | 19                                                                                                                            | 23  | 20         |

| References<br>Location                                      | Period (year)                   | Type of<br>schools | Number<br>of schools | Total number<br>of samples | Type of<br>ventilation    | Occupancy | Measurement protocol                                                                                                                         | Air temperature (°C) |     |            |
|-------------------------------------------------------------|---------------------------------|--------------------|----------------------|----------------------------|---------------------------|-----------|----------------------------------------------------------------------------------------------------------------------------------------------|----------------------|-----|------------|
|                                                             |                                 |                    |                      |                            |                           |           |                                                                                                                                              | Min                  | Max | AM ±<br>SD |
| Vornanen-<br>Winqvist et al.<br>2018 Finland<br>[12]        | May 2016 -<br>March 2017        | School             | 6                    | 6                          | HVAC*                     | Yes       | Hygrometer sensor<br>1 week continuously, at<br>0.6 meter                                                                                    | 12                   | 22  | 20         |
| Zecevic et al.<br>2018<br>Bosnia and<br>Herzegovina<br>[13] | November to<br>December<br>2016 | University         | 1                    | 2                          | Mechanical<br>ventilation | Yes       | Hygrometer sensor<br>1 week continuously<br>10 seconds time interval                                                                         | 21                   | 22  | 21         |
| Zecevic et al.<br>2018<br>Bosnia and<br>Herzegovina<br>[13] | May 2017                        | University         | 1                    | 2                          | Mechanical<br>ventilation | Yes       | Hygrometer sensor<br>1 week continuously<br>10 second time interval                                                                          | 24                   | 26  | 25         |
| Irulegi et al.<br>2017 Spain<br>[14]                        | April 2016                      | University         | 1                    | 3                          | Window<br>opening         | Yes       | Hygrometer sensor<br>1 week continuous<br>15 minutes time interval                                                                           | 17                   | 24  | 22         |
| Vilcekova et al.<br>2017 Slovakia<br>[15]                   | Autumn 2016                     | Elementary         | 1                    | 1                          | Windows<br>opening        | Yes       | Testo 435-4<br>multifunctional (air<br>temperature, air velocity,<br>RH, CO <sub>2</sub> )<br>1 week continuously<br>3 minutes time interval | 23                   | 25  | 24 ± 0.3   |
| Vilcekova et al.<br>2017 Slovakia<br>[15]                   | Autumn 2016                     | Elementary         | 1                    | 1                          | Windows<br>opening        | Yes       | Testo 435-4<br>multifunctional (air<br>temperature, air velocity,<br>RH, CO <sub>2</sub> )<br>1 week continuously<br>3 minutes time interval | 22                   | 25  | 24± 0.5    |
| Vilcekova et al.<br>2017 Slovakia<br>[15]                   | Autumn 2016                     | Elementary         | 1                    | 1                          | Windows<br>opening        | Yes       | Testo 435-4<br>multifunctional (air<br>temperature, air velocity,<br>RH, CO <sub>2</sub> )<br>1 week continuously                            | 21                   | 25  | 24 ± 0.6   |

| References<br>Location                    | Period (year)                   | Type of<br>schools | Number<br>of schools | Total number<br>of samples | Type of<br>ventilation | Occupancy | Measurement protocol                                                                                                                                 | Air temperature (°C) |     |            |
|-------------------------------------------|---------------------------------|--------------------|----------------------|----------------------------|------------------------|-----------|------------------------------------------------------------------------------------------------------------------------------------------------------|----------------------|-----|------------|
|                                           |                                 |                    |                      |                            |                        |           |                                                                                                                                                      | Min                  | Max | AM ±<br>SD |
|                                           |                                 |                    |                      |                            |                        |           | 3 minutes time interval                                                                                                                              |                      |     |            |
| Vilcekova et al.<br>2017 Slovakia<br>[15] | Autumn 2016                     | Elementary         | 1                    | 1                          | Windows<br>opening     | Yes       | Testo 435-4<br>multifunctional (air<br>temperature, air velocity,<br>RH, CO <sub>2</sub> )<br>1 week continuously<br>3 minutes time interval         | 22                   | 25  | 24 ± 0.8   |
| Vilcekova et al.<br>2017 Slovakia<br>[15] | Autumn 2016                     | Elementary         | 1                    | 1                          | Windows<br>opening     | Yes       | Testo 435-4<br>multifunctional (air<br>temperature, air velocity,<br>RH, CO <sub>2</sub> )<br>1 week continuously<br>3 minutes time interval         | 21                   | 24  | 23 ± 0.8   |
| Branco et al.<br>2015 Portugal<br>[16]    | February to<br>November<br>2013 | Daycare            | 4                    | 10                         | Window<br>opening      | Yes       | Air temperature<br>measurement probe<br>48 hours<br>1-minute time interval<br>Positioned at the same<br>height as the breathing<br>zone of children. | 14                   | 25  | 24         |
| De Giuli et al.<br>2015 Italy<br>[17]     | February 2011                   | Elementary         | 3                    | 8                          | Windows<br>opening     | Yes       | Hygrometer sensor<br>Spot measurements at 0.6<br>meter                                                                                               | 22                   | 24  | 23 ± 0.7   |
| De Giuli et al.<br>2015 Italy<br>[17]     | April 2011                      | Elementary         | 3                    | 8                          | Windows<br>opening     | Yes       | Hygrometer sensor<br>Spot measurements at 0.6<br>meter                                                                                               | 20                   | 24  | 23 ± 1.7   |
| De Giuli et al.<br>2015 Italy<br>[17]     | June 2011                       | Elementary         | 3                    | 8                          | Windows<br>opening     | Yes       | Hygrometer sensor<br>Spot measurement at 0.6<br>meter                                                                                                | 25                   | 28  | 26 ± 1.1   |
| Pereira et al.<br>2015 Portugal<br>[18]   | February and<br>May 2010        | Secondary          | 1                    | 1                          | Window<br>opening      | Yes       | Hygrometer sensor<br>1 time of 24 hours<br>continuously and 1 time of<br>48 hours continuously                                                       | 13                   | 18  | N/A        |

| References<br>Location                  | Period (year)        | Type of<br>schools | Number<br>of schools | Total number<br>of samples | Type of<br>ventilation | Occupancy | Measurement protocol                                                                   | Air temperature (°C) |     |            |
|-----------------------------------------|----------------------|--------------------|----------------------|----------------------------|------------------------|-----------|----------------------------------------------------------------------------------------|----------------------|-----|------------|
|                                         |                      |                    |                      |                            |                        |           |                                                                                        | Min                  | Max | AM ±<br>SD |
| De Giuli et al.<br>2014 Italy [19]      | March 2012           | Elementary         | 1                    | 12                         | Window<br>opening      | Yes       | Hygrometer sensor<br>Spot measurements<br>recorded on one day at 0.6<br>meter          | 21                   | 26  | 23 ± 1.3   |
| De Giuli et al.<br>2014 Italy [19]      | April 2012           | Elementary         | 1                    | 10                         | Windows<br>opening     | Yes       | Hygrometer sensor<br>Spot measurements<br>recorded on day at 0.6<br>meter              | 25                   | 27  | 26 ± 0.6   |
| De Giuli et al.<br>2014 Italy [19]      | May 2012             | Elementary         | 1                    | 12                         | Windows<br>opening     | Yes       | Hygrometer senso<br>Spot measurements<br>recorded on one day at 0.6<br>meter           | 20                   | 22  | 21 ± 0.7   |
| De Giuli et al.<br>2014 Italy [19]      | June 2012            | Elementary         | 1                    | 11                         | Windows<br>opening     | Yes       | Hygrometer sensor<br>Spot measurements<br>recorded on one day at 0.6<br>meter          | 25                   | 28  | 27 ± 0.9   |
| Pereira et al.<br>2014 Portugal<br>[20] | April to May<br>2013 | Secondary          | 1                    | 2                          | Window<br>opening      | No        | Hygrometer sensor<br>2 weeks continuously, 1<br>minute time interval at 0.6<br>meter   | 16                   | 26  | 21 ± 1.9   |
| Alves et al.<br>2013 Portugal<br>[21]   | January 2012         | Elementary         | 1                    | 3                          | Window<br>opening      | Yes       | Air temperature<br>measurement probe<br>Monday to Friday<br>continuously at 1.2 meters | N/A                  | N/A | 18 ± 1.4   |
| Alves et al.<br>2013 Portugal<br>[21]   | January 2012         | Kindergarten       | 1                    | 1                          | Window<br>opening      | Yes       | Air temperature<br>measurement probe<br>Monday to Friday<br>continuously at 1.2 meters | N/A                  | N/A | 19 ± 4.3   |
| Alves et al.<br>2013 Portugal<br>[21]   | January 2012         | Elementary         | 1                    | 2                          | Window<br>opening      | Yes       | Air temperature<br>measurement probe<br>Monday to Friday<br>continuously at 1.2 meters | N/A                  | N/A | 18 ± 1.5   |
| Alves et al.<br>2013 Portugal           | January 2012         | Elementary         | 1                    | 3                          | Window<br>opening      | Yes       | Air temperature<br>measurement probe                                                   | N/A                  | N/A | 18 ± 1.5   |

| References<br>Location                   | Period (year)                  | Type of<br>schools | Number<br>of schools | Total number<br>of samples | Type of<br>ventilation                                                                 | Occupancy | Measurement protocol                                                                      | Air temperature (°C) |          |            |
|------------------------------------------|--------------------------------|--------------------|----------------------|----------------------------|----------------------------------------------------------------------------------------|-----------|-------------------------------------------------------------------------------------------|----------------------|----------|------------|
|                                          |                                |                    |                      |                            |                                                                                        |           |                                                                                           | Min                  | Max      | AM ±<br>SD |
| [21]                                     |                                |                    |                      |                            |                                                                                        |           | Monday to Friday<br>continuously at 1.2 meters                                            |                      |          |            |
| De Giuli et al.<br>2012 Italy [22]       | February to<br>June 2010       | Elementary         | 7                    | 28                         | Window<br>opening                                                                      | Yes       | Hygrometer sensor<br>Spot measurements at 0.6<br>meter                                    | 20                   | 25       | 22 ± 1.4   |
| Haverinen et al.<br>2015 Finland<br>[23] | January to<br>April 2009       | Elementary         | 70                   | 70                         | 12 Air<br>handling<br>unit<br>15 Fan coil<br>44 Unit<br>ventilators                    | Yes       | Hygrometer sensor (TSI<br>QTrak Monitors)<br>1 week measurement<br>5 minutes interval     | N/A                  | 25 ± 1.5 | 23 ± 1.1   |
| Haverinen et al.<br>2015 Finland<br>[23] | October to<br>December<br>2009 | Elementary         | 27                   | 27                         | 3 Air<br>handling<br>unit<br>9 Fan coil<br>14 Unit<br>ventilators                      | Yes       | Hygrometer sensor (TSI<br>QTrak Monitors)<br>3 days measurement<br>5 minutes interval     | N/A                  | 25 ± 1.1 | 23 ± 0.8   |
| Haverinen et al.<br>2015 Finland<br>[23] | January 2010<br>to May 2010    | Elementary         | 27                   | 27                         | 3 Air<br>handling<br>unit<br>9 Fan coil<br>14 Unit<br>ventilators                      | Yes       | Hygrometer sensor<br>3 days measurement<br>5 minutes interval                             | N/A                  | 26 ± 2.1 | 23 ± 1.8   |
| Toftum et al.<br>2015 Denmark<br>[24]    | September to<br>October 2009   | Elementary         | 311                  | 723                        | 379 Window<br>opening<br>130<br>Mechanical<br>exhaust<br>223<br>Mechanical<br>balanced | Yes       | Thermometer provide by<br>the schools<br>Spot measurement at the<br>end of the school day | 14                   | 30       | 22 ± 1.8   |

| References<br>Location                             | Period (year)                  | Type of<br>schools        | Number<br>of schools | Total number<br>of samples | Type of<br>ventilation                                                              | Occupancy | Measurement protocol                                                                          | Air temperature (°C) |     |            |
|----------------------------------------------------|--------------------------------|---------------------------|----------------------|----------------------------|-------------------------------------------------------------------------------------|-----------|-----------------------------------------------------------------------------------------------|----------------------|-----|------------|
|                                                    |                                |                           |                      |                            |                                                                                     |           |                                                                                               | Min                  | Max | AM ±<br>SD |
| Toftum et al.<br>2015 Denmark<br>[24]              | October to<br>December<br>2009 | Elementary                | 88                   | 88                         | 44 Window<br>opening<br>10<br>Mechanical<br>exhaust<br>31<br>Mechanical<br>balanced | Yes       | Hygrometer sensor<br>(HOBO, signal range: ±<br>2mV ± 2.5% of reading)<br>17 days measurement  | N/A                  | 27  | 21 ± 1.0   |
| Erlandson et al.<br>2019 USA [25]                  | Yearlong 2019                  | University                | 1                    | 1                          | HVAC                                                                                | Yes       | Hygrometer sensor (Q-trak<br>TSI)<br>8 hours period with 1<br>minute interval                 | N/A                  | N/A | N/A        |
| Canha et al.<br>2016 France<br>[26]                | January to<br>April 2010       | Nursery and<br>Elementary | 10                   | 44                         | Window<br>opening and<br>Mechanical<br>ventilation                                  | Yes       | Hygrometer sensor (Q<br>Trak plus ±0.6°C)<br>4.5 days measurement with<br>10 minutes interval | 20                   | 26  | 22         |
| Canha et al.<br>2016 France<br>[26]                | April to June<br>2010          | Nursery and<br>Elementary | 7                    | 44                         | Window<br>opening and<br>Mechanical<br>ventilation                                  | Yes       | Hygrometer sensor (Q<br>Trak plus ±0.6°C)<br>4.5 days measurement with<br>10 minutes interval | 21                   | 27  | 24         |
| Jovanovic et al.<br>2014 Serbia<br>[27]            | April 2012                     | Elementary                | 1                    | 5                          | Window<br>opening                                                                   | Yes       | Hygrometer sensor (Testo<br>435-4, ±0.3°C)<br>8 days measurement                              | 17                   | 31  | 26 ± 2.1   |
| Senitkova et al.<br>2017<br>Czech Republic<br>[28] | 2017                           | Nursery                   | 3                    | 6                          | Window<br>opening                                                                   | Yes       | Hygrometer sensor (Testo<br>175 H2, ± 0.5 °C)<br>1 day measurement at 1.0<br>meter            | 22                   | 24  | 23 ± 0.9   |
| Barmmparesos et<br>al. 2018 Greece<br>[29]         | June to July<br>2017           | Elementary                | 1                    | 1                          | Window<br>opening<br>(Under<br>green roof<br>system)                                | Yes       | Hygrometer sensor<br>(TinyTag plus, ± 0.6 °C)<br>24h measurement at 15<br>minutes interval    | 29                   | 34  | 32 ± 1.1   |



| References<br>Location              | Period (year)              | Type of<br>schools                | Number<br>of schools | Total number<br>of samples | Type of<br>ventilation                          | Occupancy | Measurement protocol                                                              | Air temperature (°C) |     |            |
|-------------------------------------|----------------------------|-----------------------------------|----------------------|----------------------------|-------------------------------------------------|-----------|-----------------------------------------------------------------------------------|----------------------|-----|------------|
|                                     |                            |                                   |                      |                            |                                                 |           |                                                                                   | Min                  | Max | AM ±<br>SD |
| Barmparesos et al. 2018 Greece [29] | October to March 2017      | Elementary                        | 1                    | 1                          | Window opening (Under green roof system)        | Yes       | Hygrometer sensor (TinyTag plus, ± 0.6 °C) 24h measurement at 15 minutes interval | 11                   | 28  | 20 ± 3.1   |
| Barmparesos et al. 2018 Greece [29] | April to June 2017         | Elementary                        | 1                    | 1                          | Window opening (Under green roof system)        | Yes       | Hygrometer sensor (TinyTag plus, ± 0.6 °C) 24h measurement at 15 minutes interval | 21                   | 30  | 25 ± 2.4   |
| Barmparesos et al. 2018 Greece [29] | June to July 2017          | Elementary                        | 1                    | 1                          | Window opening (Under cement roof)              | Yes       | Hygrometer sensor (TinyTag plus, ± 0.6 °C) 24h measurement at 15 minutes interval | 31                   | 38  | 35 ± 1.2   |
| Barmparesos et al. 2018 Greece [29] | October to March 2017      | Elementary                        | 1                    | 1                          | Window opening (Under cement roof)              | Yes       | Hygrometer sensor (TinyTag plus, ± 0.6 °C) 24h measurement at 15 minutes interval | 6.0                  | 26  | 16 ± 4.2   |
| Barmparesos et al. 2018 Greece [29] | April to June 2017         | Elementary                        | 1                    | 1                          | Window opening (Under cement roof)              | Yes       | Hygrometer sensor (TinyTag plus, ± 0.6 °C) 24h measurement at 15 minutes interval | 19                   | 37  | 26 ± 2.4   |
| Verriele et al. 2016 France [30]    | 2009 to 2013               | Elementary High school University | 10                   | 10                         | HVAC with CO <sub>2</sub> and occupancy sensors | Yes       | Hygrometer sensor (Q Trak) 4.5 days measurement. Measured at 2m height            | 19                   | 23  | 21 ± 1.0   |
| Istrate et al. 2016 Romania [31]    | July to August 2015        | High school                       | 1                    | 2                          | HVAC                                            | N/A       | N/A                                                                               | N/A                  | N/A | N/A        |
| Zhong et al. 2016 USA [32]          | October 2015 to March 2016 | Elementary and K8 schools         | 37                   | 144                        | HVAC                                            | Both      | Measured at 0.6 meter                                                             | N/A                  | N/A | 22 ± 1.4   |

| References<br>Location                           | Period (year)                        | Type of<br>schools          | Number<br>of schools | Total number<br>of samples | Type of<br>ventilation                    | Occupancy | Measurement protocol                                                               | Air temperature (°C) |     |            |
|--------------------------------------------------|--------------------------------------|-----------------------------|----------------------|----------------------------|-------------------------------------------|-----------|------------------------------------------------------------------------------------|----------------------|-----|------------|
|                                                  |                                      |                             |                      |                            |                                           |           |                                                                                    | Min                  | Max | AM ±<br>SD |
| Stamp et al.<br>2020 UK<br>[33]                  | 2017                                 | Secondary                   | 1                    | 1                          | Mechanical<br>and by<br>opening<br>window | Yes       | N/A                                                                                | N/A                  | N/A | N/A        |
| Madureira et al.<br>2015 Portugal<br>[34]        | November to<br>March 2011 to<br>2013 | Elementary                  | 20                   | 73                         | Opening<br>window                         | Yes       | Hygrometer (IAQ-CALC<br>TSI 7545 monitor, ± 0.6<br>°C)                             | 14                   | 25  | 21         |
| Csobod et al.<br>2014<br>Northern<br>Europe [35] | Non heating<br>season<br>2014        | Nurseries and<br>elementary | 13                   | 39                         | Window<br>opening                         | Yes       | Hygrometer sensor (Catec<br>Klimabox)<br>5 days continuously<br>(Monday to Friday) | 18                   | 25  | 22         |
| Csobod et al.<br>2014<br>Northern<br>Europe [35] | Non heating<br>season<br>2014        | Nurseries and<br>elementary | 26                   | 78                         | Window<br>opening                         | Yes       | Hygrometer sensor (Catec<br>Klimabox)<br>5 days continuously<br>(Monday to Friday) | 17                   | 30  | 22         |
| Csobod et al.<br>2014<br>Northern<br>Europe [35] | Non heating<br>season<br>2014        | Nurseries and<br>elementary | 44                   | 132                        | Window<br>opening                         | Yes       | Hygrometer sensor (Catec<br>Klimabox)<br>5 days continuously<br>(Monday to Friday) | 12                   | 29  | 21         |
| Csobod et al.<br>2014<br>Northern<br>Europe [35] | Non heating<br>season<br>2014        | Nurseries and<br>elementary | 31                   | 93                         | Window<br>opening                         | Yes       | Hygrometer sensor (Catec<br>Klimabox)<br>5 days continuously<br>(Monday to Friday) | 11                   | 25  | 19         |
| Oliveira et al.<br>2016 Portugal<br>[36]         | April to June<br>2013                | Kindergarten                | 1                    | 1                          | Window<br>opening                         | Yes       | Hygrometer sensor (TG<br>502 GrayWolf)<br>63 days consecutive                      | 22                   | 32  | 25         |
| Oliveira et al.<br>2016 Portugal<br>[36]         | April to June<br>2013                | Kindergarten                | 1                    | 1                          | Window<br>opening                         | Yes       | Hygrometer sensor (TG<br>502 GrayWolf)<br>63 days consecutive                      | 14                   | 29  | 21         |
| Oliveira et al.<br>2017 Portugal<br>[37]         | April to June<br>2013                | Kindergarten                | 2                    | 2                          | Window<br>opening                         | Yes       | Hygrometer sensor (Testo<br>mini data-logger 174H)<br>7 weeks continuously         | 14                   | 32  | 23 ± 2.2   |

| References<br>Location                                       | Period (year)                                            | Type of<br>schools | Number<br>of schools | Total number<br>of samples | Type of<br>ventilation | Occupancy   | Measurement protocol                                                                                                  | Air temperature (°C) |     |            |
|--------------------------------------------------------------|----------------------------------------------------------|--------------------|----------------------|----------------------------|------------------------|-------------|-----------------------------------------------------------------------------------------------------------------------|----------------------|-----|------------|
|                                                              |                                                          |                    |                      |                            |                        |             |                                                                                                                       | Min                  | Max | AM ±<br>SD |
| Zivkovic et al.<br>2015 Serbia<br>[38]                       | December<br>2011 to Jun<br>2012<br>Heating<br>season     | Mixed              | 4                    | 5                          | Window<br>opening      | Yes         | N/A                                                                                                                   | 15                   | 21  | 18 ± 3.2   |
| Zivkovic et al.<br>2015 Serbia<br>[38]                       | December<br>2011 to Jun<br>2012<br>Non-heating<br>season | Mixed              | 4                    | 5                          | Window<br>opening      | Yes         | N/A                                                                                                                   | 21                   | 25  | 22 ± 2.1   |
| Loreti et al.<br>2016 Italy [39]                             | N/A                                                      | Secondary          | 1                    | 5                          | Window<br>opening      | Yes         | Hygrometer sensor<br>DH206-2 Delta-Ohm data-<br>logger during morning<br>classes<br>1 minute interval                 | 20                   | 21  | N/A        |
| de la Hoz –<br>Torres et al.<br>2022 Portugal,<br>Spain [40] | Fall 2021                                                | University         | 2                    | 12                         | Window<br>opening      | Yes         | Hygrometer sensor, FHAD<br>46- C41A AHLBORN, 1.5<br>to 2.5 hours on continuous,<br>1 minute interval, at 0.6<br>meter | 21                   | 26  | 23 ± 1.9   |
| Heracleous et al.<br>2019 Cyprus<br>[41]                     | Winter 2018                                              | Secondary          | 1                    | 4                          | Window<br>opening      | Both period | Hygrometer sensor<br>UX100-003 HOBO, 1<br>week on continuous, 1<br>minute interval                                    | 17                   | 24  | N/A        |
| Korsavi et al.<br>2019 England<br>[42]                       | Year long<br>2017 and 2018                               | Elementary         | 8                    | 31                         | Window<br>opening      | Yes         | Hygrometer SWEMA, 2<br>days on continuous, 5<br>minutes interval, at 1.1<br>meters                                    | N/A                  | N/A | N/A        |
| Oldham et al.<br>2020, United<br>States [43]                 | Fall, spring<br>2018                                     | Elementary         | 5                    | 5                          | Window<br>opening      | Both period | Thermistor, 5 days on<br>continuous                                                                                   | 21                   | 26  | N/A        |

HVAC: Heat, ventilation and air conditioning; AM: arithmetic mean; SD: standard deviation; \*\*: adjusted to the French stock of schools



**1.2 Table S2: Measurement of relative humidity in schools across Europe and North America from 2010**

| References<br>Location                | Period (year)                   | Type of<br>schools     | Number<br>of schools | Number of<br>total samples | Type of<br>ventilation                    | Occupancy | Measurement protocol                                                                                             | Relative humidity (%) |     |              |
|---------------------------------------|---------------------------------|------------------------|----------------------|----------------------------|-------------------------------------------|-----------|------------------------------------------------------------------------------------------------------------------|-----------------------|-----|--------------|
|                                       |                                 |                        |                      |                            |                                           |           |                                                                                                                  | Min                   | Max | AM $\pm$ SD  |
| Campano-Laborda et al. 2020 Spain [2] | Winter 2020                     | Secondary              | 8                    | 564                        | Window opening                            | Yes       | Hygrometer sensor<br>30 minutes on continuous<br>Two times per day, 1 in early morning and 1 in midmorning break | 49                    | 51  | 51 $\pm$ 6   |
| Campano-Laborda et al. 2020 Spain [2] | Midseason 2020                  | Secondary              | 8                    | 564                        | Window opening                            | Yes       | Hygrometer sensor<br>30 minutes on continuous<br>Two times per day, 1 in early morning and 1 in midmorning break | 44                    | 46  | 45 $\pm$ 10  |
| Harcarova et al. 2020 Slovakia [3]    | Winter 2020                     | Elementary             | 1                    | 1                          | Window opening                            | Yes       | Hygrometer sensor<br>1 hour                                                                                      | 37                    | 52  | 24 $\pm$ 0.8 |
| Harcarova et al. 2020 Slovakia [3]    | Winter 2020                     | Elementary             | 1                    | 1                          | Window opening                            | Yes       | Hygrometer sensor<br>1 hour                                                                                      | 22                    | 23  | 22 $\pm$ 0.2 |
| Langer et al. 2020 Sweden [4]         | October - March 2017            | Elementary             | 10                   | 10                         | Mechanical ventilation<br>Windows opening | Yes       | Hygrometer sensor<br>1 week continuous<br>2 minutes interval                                                     | N/A                   | N/A | N/A          |
| Papadopoulos et al. 2020 Greece [5]   | December 2019                   | University             | 1                    | 10                         | Window opening                            | Yes       | Hygrometer sensor<br>30 minutes on continuous<br>3 days                                                          | 38                    | 44  | 41           |
| Papadopoulos et al. 2020 Greece [5]   | December 2019                   | University             | 1                    | 10                         | Window opening                            | Yes       | Hygrometer sensor<br>30 minutes on continuous<br>3 days                                                          | 35                    | 46  | 40           |
| Ahmed et al. 2019 Finland [6]         | Heating and cooling season 2019 | Daycare and elementary | 1                    | 7                          | HVAC*                                     | Yes       | Hygrometer sensor<br>1 month on continuous 10 minutes interval                                                   | N/A                   | N/A | N/A          |

| References<br>Location                                      | Period (year)                   | Type of<br>schools | Number<br>of schools | Number of<br>total samples | Type of<br>ventilation    | Occupancy | Measurement protocol                                                      | Relative humidity (%) |     |             |
|-------------------------------------------------------------|---------------------------------|--------------------|----------------------|----------------------------|---------------------------|-----------|---------------------------------------------------------------------------|-----------------------|-----|-------------|
|                                                             |                                 |                    |                      |                            |                           |           |                                                                           | Min                   | Max | AM $\pm$ SD |
| Brdaric et al.<br>2019 Croatia<br>[7]                       | February -<br>May 2014          | Elementary         | 20                   | 20                         | Window<br>opening         | Yes       | Hygrometer sensor<br>1 week<br>1 minute interval                          | 31                    | 60  | N/A         |
| Papazoglou et<br>al. 2019 Greece<br>[8]                     | January 2016                    | University         | 1                    | 1                          | Window<br>opening         | Yes       | Relative humidity probe<br>90 minutes<br>10 second time interval          | N/A                   | N/A | 70          |
| Simanic, et al.<br>2019 Sweden<br>[9]                       | Heating<br>season 2018          | Elementary         | 7                    | 145                        | HVAC*                     | Yes       | Hygrometer sensor<br>1 week on continuous<br>7h30 to 16h00                | N/A                   | N/A | N/A         |
| Simanic, et al.<br>2019 Sweden<br>[9]                       | Cooling<br>season 2018          | Elementary         | 2                    | 3                          | HVAC*                     | Yes       | Hygrometer sensor<br>1 week on continuous<br>7h30 to 16h00                | N/A                   | N/A | N/A         |
| Buratti et al.<br>2018 Italy [10]                           | Spring and<br>Autumn 2015       | University         | 7                    | 7                          | Mechanical<br>ventilation | Yes       | Microclimatic station in<br>compliance with ISO 7726<br>1 week continuous | 33                    | 71  | 47          |
| Vornanen-<br>Winqvist et al.<br>2020 Finland<br>[11]        | April to<br>September<br>2016   | Secondary          | 1                    | 2                          | HVAC*                     | Yes       | Hygrometer sensor<br>1 week on continuous                                 | 32                    | 72  | 49          |
| Vornanen-<br>Winqvist et al.<br>2018 Finland<br>[12]        | May 2016 -<br>March 2017        | School             | 6                    | 6                          | HVAC*                     | Yes       | Hygrometer sensor<br>1 week on continuous                                 | 18                    | 40  | 29          |
| Zecevic et al.<br>2018<br>Bosnia and<br>Herzegovina<br>[13] | November to<br>December<br>2016 | University         | 1                    | 2                          | Mechanical<br>ventilation | Yes       | Hygrometer sensor<br>1 week on continuous<br>10 seconds time interval     | 30                    | 38  | 33          |
| Zecevic et al.<br>2018<br>Bosnia and<br>Herzegovina<br>[13] | May 2017                        | University         | 1                    | 2                          | Mechanical<br>ventilation | Yes       | Hygrometer sensor<br>1 week on continuous<br>10 second time interval      | 35                    | 46  | 39          |

| References<br>Location                    | Period (year) | Type of<br>schools | Number<br>of schools | Number of<br>total samples | Type of<br>ventilation | Occupancy | Measurement protocol                                                                                                                          | Relative humidity (%) |     |              |
|-------------------------------------------|---------------|--------------------|----------------------|----------------------------|------------------------|-----------|-----------------------------------------------------------------------------------------------------------------------------------------------|-----------------------|-----|--------------|
|                                           |               |                    |                      |                            |                        |           |                                                                                                                                               | Min                   | Max | AM $\pm$ SD  |
| Irulegi et al.<br>2017 Spain<br>[14]      | April 2016    | University         | 1                    | 3                          | Window<br>opening      | Yes       | Hygrometer sensor<br>1 week continuous<br>15 minutes time interval                                                                            | 33                    | 57  | 44           |
| Vilcekova et al.<br>2017 Slovakia<br>[15] | Autumn 2016   | Elementary         | 1                    | 1                          | Windows<br>opening     | Yes       | Testo 435-4<br>multifunctional (air<br>temperature, air velocity,<br>RH, CO <sub>2</sub> )<br>1 week on continuous<br>3 minutes time interval | 46                    | 54  | 50 $\pm$ 2   |
| Vilcekova et al.<br>2017 Slovakia<br>[15] | Autumn 2016   | Elementary         | 1                    | 1                          | Windows<br>opening     | Yes       | Testo 435-4<br>multifunctional (air<br>temperature, air velocity,<br>RH, CO <sub>2</sub> )<br>1 week on continuous<br>3 minutes time interval | 47                    | 53  | 50 $\pm$ 1.2 |
| Vilcekova et al.<br>2017 Slovakia<br>[15] | Autumn 2016   | Elementary         | 1                    | 1                          | Windows<br>opening     | Yes       | Testo 435-4<br>multifunctional (air<br>temperature, air velocity,<br>RH, CO <sub>2</sub> )<br>1 week on continuous<br>3 minutes time interval | 45                    | 52  | 48 $\pm$ 1.3 |
| Vilcekova et al.<br>2017 Slovakia<br>[15] | Autumn 2016   | Elementary         | 1                    | 1                          | Windows<br>opening     | Yes       | Testo 435-4<br>multifunctional (air<br>temperature, air velocity,<br>RH, CO <sub>2</sub> )<br>1 week on continuous<br>3 minutes time interval | 44                    | 54  | 50 $\pm$ 2.1 |
| Vilcekova et al.<br>2017 Slovakia<br>[15] | Autumn 2016   | Elementary         | 1                    | 1                          | Windows<br>opening     | Yes       | Testo 435-4<br>multifunctional (air<br>temperature, air velocity,<br>RH, CO <sub>2</sub> )<br>1 week on continuous<br>3 minutes time interval | 48                    | 54  | 51 $\pm$ 1.3 |

| References<br>Location                   | Period (year)                   | Type of<br>schools | Number<br>of schools | Number of<br>total samples | Type of<br>ventilation | Occupancy | Measurement protocol                                                                             | Relative humidity (%) |      |                                        |
|------------------------------------------|---------------------------------|--------------------|----------------------|----------------------------|------------------------|-----------|--------------------------------------------------------------------------------------------------|-----------------------|------|----------------------------------------|
|                                          |                                 |                    |                      |                            |                        |           |                                                                                                  | Min                   | Max  | AM $\pm$ SD                            |
| Branco et al.<br>2015 Portugal.<br>[16]  | February to<br>November<br>2013 | Daycare            | 4                    | 10                         | Window<br>opening      | Yes       | Capacitive sensor<br>48 hours<br>1 minute time interval                                          | 37                    | 83   | Range:<br>$51 \pm 4.6$ to $78 \pm 2.7$ |
| De Giuli et al.<br>2015 Italy [17]       | February 2011                   | Elementary         | 3                    | 8                          | Windows<br>opening     | Yes       | Hygrometer sensor<br>Spot measurements<br>recorded on one day                                    | N/A                   | N/A  | $39 \pm 2$                             |
| De Giuli et al.<br>2015 Italy [17]       | March-April<br>2011             | Elementary         | 3                    | 8                          | Windows<br>opening     | Yes       | Hygrometer sensor,<br>Spot measurements<br>recorded on one day                                   | N/A                   | N/A  | $41 \pm 7$                             |
| De Giuli et al.<br>2015 Italy [17]       | June 2011                       | Elementary         | 3                    | 8                          | Windows<br>opening     | Yes       | Hygrometer sensor<br>Spot measurement<br>recorded on one day                                     | N/A                   | N/A  | $53 \pm 10$                            |
| Pereira et al.<br>2015 Portugal.<br>[18] | February and<br>May 2010        | Secondary          | 1                    | 1                          | Window<br>opening      | Yes       | Hygrometer sensor<br>1 time of 24 hours on<br>continuous and 1 time of<br>48 hours on continuous | 37                    | 69   | $50 \pm 1.6$                           |
| De Giuli et al.<br>2014 Italy [19]       | March 2012                      | Elementary         | 1                    | 12                         | Window<br>opening      | Yes       | Hygrometer sensor<br>Spot measurements<br>recorded on one day                                    | 32                    | 38   | $34 \pm 1.9$                           |
| De Giuli et al.<br>2014 Italy [19]       | April 2012                      | Elementary         | 1                    | 10                         | Windows<br>opening     | Yes       | Hygrometer sensor<br>Spot measurements<br>recorded on one day                                    | 48                    | 53   | $50 \pm 1.5$                           |
| De Giuli et al.<br>2014 Italy [19]       | May 2012                        | Elementary         | 1                    | 12                         | Windows<br>opening     | Yes       | Hygrometer sensor<br>Spot measurements<br>recorded on one day                                    | 50                    | 51   | $50 \pm 0.3$                           |
| De Giuli et al.<br>2014 Italy [19]       | June 2012                       | Elementary         | 1                    | 11                         | Windows<br>opening     | Yes       | Hygrometer sensor<br>Spot measurements<br>recorded on one day                                    | 50                    | 54   | $52 \pm 1.0$                           |
| Pereira et al.<br>2014 Portugal<br>[20]  | April to May<br>2013            | Secondary          | 1                    | 2                          | Window<br>opening      | No        | Hygrometer sensor<br>2 weeks on continuous, 1<br>minute time interval                            | 26.9                  | 65.9 | $47.2 \pm 1.85$                        |



| References<br>Location                        | Period (year)                  | Type of<br>schools          | Number<br>of schools | Number of<br>total samples | Type of<br>ventilation                                              | Occupancy | Measurement protocol                                                                  | Relative humidity (%) |     |                                         |
|-----------------------------------------------|--------------------------------|-----------------------------|----------------------|----------------------------|---------------------------------------------------------------------|-----------|---------------------------------------------------------------------------------------|-----------------------|-----|-----------------------------------------|
|                                               |                                |                             |                      |                            |                                                                     |           |                                                                                       | Min                   | Max | AM $\pm$ SD                             |
| Alves et al.<br>2013 Portugal<br>[21]         | January 2012                   | Elementary<br>Urban-Traffic | 1                    | 3                          | Window<br>opening                                                   | Yes       | Relative humidity<br>measurement probe<br>Monday to Friday on<br>continuous           | N/A                   | N/A | Range: $47.8 \pm 3.2$ to $65.7 \pm 3.3$ |
| Alves et al.<br>2013 Portugal<br>[21]         | January 2012                   | Kindergarten<br>Urban       | 1                    | 1                          | Window<br>opening                                                   | Yes       | Relative humidity<br>measurement probe<br>Monday to Friday on<br>continuous           | N/A                   | N/A | $61.9 \pm 8.1$                          |
| Alves et al.<br>2013 Portugal<br>[21]         | January 2012                   | Elementary<br>Urban         | 1                    | 2                          | Window<br>opening                                                   | Yes       | Relative humidity<br>measurement probe<br>Monday to Friday on<br>continuous           | N/A                   | N/A | Range: $57.8 \pm 4.6$ to $71.6 \pm 2.0$ |
| Alves et al.<br>2013 Portugal<br>[21]         | January 2012                   | Elementary<br>Rural         | 1                    | 3                          | Window<br>opening                                                   | Yes       | Relative humidity<br>measurement probe<br>Monday to Friday on<br>continuous           | N/A                   | N/A | Range: $51.9 \pm 5.8$ to $65.8 \pm 4.6$ |
| De Giuli et al.<br>2012 Italy [22]            | February to<br>June 2010       | Elementary                  | 7                    | 28                         | Window<br>opening                                                   | Yes       | Hygrometer sensor<br>Spot measurements<br>recorded on one day                         | N/A                   | N/A | $46.1 \pm 8.7$                          |
| Ulla Haverinen<br>et al. 2015<br>Finland [23] | January to<br>April 2009       | Elementary                  | 70                   | 70                         | 12 Air<br>handling<br>unit<br>15 Fan coil<br>44 Unit<br>ventilators | Yes       | Hygrometer sensor (TSI<br>QTrak Monitors)<br>1 week measurement<br>5 minutes interval | N/A                   | N/A | $47 \pm 7.8$                            |
| Ulla Haverinen<br>et al. 2015<br>Finland [23] | October to<br>December<br>2009 | Elementary                  | 27                   | 27                         | 3 Air<br>handling<br>unit<br>9 Fan coil<br>14 Unit<br>ventilators   | Yes       | Hygrometer sensor (TSI<br>QTrak Monitors)<br>3 days measurement<br>5 minutes interval | N/A                   | N/A | $46 \pm 7.3$                            |

| References<br>Location                        | Period (year)                  | Type of<br>schools        | Number<br>of schools | Number of<br>total samples | Type of<br>ventilation                                                              | Occupancy | Measurement protocol                                                                                 | Relative humidity (%) |     |              |
|-----------------------------------------------|--------------------------------|---------------------------|----------------------|----------------------------|-------------------------------------------------------------------------------------|-----------|------------------------------------------------------------------------------------------------------|-----------------------|-----|--------------|
|                                               |                                |                           |                      |                            |                                                                                     |           |                                                                                                      | Min                   | Max | AM $\pm$ SD  |
| Ulla Haverinen<br>et al. 2015<br>Finland [23] | January 2010<br>to May 2010    | Elementary                | 27                   | 27                         | 3 Air<br>handling<br>unit<br>9 Fan coil<br>14 Unit<br>ventilators                   | Yes       | Hygrometer sensor<br>3 days measurement<br>5 minutes interval                                        | N/A                   | N/A | 49 $\pm$ 10  |
| Toftum et al.<br>2015 Danemark<br>[24]        | October to<br>December<br>2009 | Elementary                | 88                   | 88                         | 44 Window<br>opening<br>10<br>Mechanical<br>exhaust<br>31<br>Mechanical<br>balanced | Yes       | Hygrometer sensor<br>(HOBO, signal range: $\pm$<br>2mV $\pm$ 2.5% of reading)<br>17 days measurement | N/A                   | N/A | N/A          |
| Erlandson et al.<br>2019 USA [25]             | Yearlong 2019                  | University                | 1                    | 1                          | HVAC                                                                                | Yes       | Hygrometer sensor (Q-trak<br>TSI)<br>8 hours period with 1<br>minute interval                        | N/A                   | N/A | N/A          |
| Canha et al.<br>2016 France<br>[26]           | January to<br>April 2010       | Nursery and<br>Elementary | 10                   | 44                         | Window<br>opening and<br>Mechanical<br>ventilation                                  | Yes       | Hygrometer sensor (Q<br>Trak plus $\pm$ 0.6°C)<br>4.5 days measurement with<br>10 minutes interval   | 18                    | 39  | 31           |
| Canha et al.<br>2016 France<br>[26]           | April to June<br>2010          | Nursery and<br>Elementary | 7                    | 44                         | Window<br>opening and<br>Mechanical<br>ventilation                                  | Yes       | Hygrometer sensor (Q<br>Trak plus $\pm$ 0.6°C)<br>4.5 days measurement with<br>10 minutes interval   | 34                    | 62  | 47           |
| Jovanovic et al.<br>2014 Serbia<br>[27]       | April 2012                     | Elementary                | 1                    | 5                          | Window<br>opening                                                                   | Yes       | Hygrometer sensor (Testo<br>435-4, $\pm$ 0.3°C)<br>8 days measurement                                | 13                    | 54  | 33 $\pm$ 8.4 |
| Senitkova 2017<br>Czech Republic<br>[28]      | 2017                           | Nursery                   | 3                    | 6                          | Window<br>opening                                                                   | Yes       | Hygrometer sensor (Testo<br>175 H2, $\pm$ 0.5 °C)<br>1 day measurement                               | 40                    | 63  | 52 $\pm$ 10  |

| References<br>Location              | Period (year)         | Type of<br>schools                | Number<br>of schools | Number of<br>total samples | Type of<br>ventilation                   | Occupancy | Measurement protocol                                                                  | Relative humidity (%) |     |              |
|-------------------------------------|-----------------------|-----------------------------------|----------------------|----------------------------|------------------------------------------|-----------|---------------------------------------------------------------------------------------|-----------------------|-----|--------------|
|                                     |                       |                                   |                      |                            |                                          |           |                                                                                       | Min                   | Max | AM $\pm$ SD  |
| Barmparesos et al. 2018 Greece [29] | June to July 2017     | Elementary                        | 1                    | 1                          | Window opening (Under green roof system) | Yes       | Hygrometer sensor (TinyTag plus, $\pm 0.6$ °C) 24h measurement at 15 minutes interval | 29                    | 46  | $41 \pm 2.4$ |
| Barmparesos et al. 2018 Greece [29] | October to March 2017 | Elementary                        | 1                    | 1                          | Window opening (Under green roof system) | Yes       | Hygrometer sensor (TinyTag plus, $\pm 0.6$ °C) 24h measurement at 15 minutes interval | 27                    | 74  | $47 \pm 7.9$ |
| Barmparesos et al. 2018 Greece [29] | April to June 2017    | Elementary                        | 1                    | 1                          | Window opening (Under green roof system) | Yes       | Hygrometer sensor (TinyTag plus, $\pm 0.6$ °C) 24h measurement at 15 minutes interval | 28                    | 61  | $47 \pm 5.4$ |
| Barmparesos et al. 2018 Greece [29] | June to July 2017     | Elementary                        | 1                    | 1                          | Window opening (Under cement roof)       | Yes       | Hygrometer sensor (TinyTag plus, $\pm 0.6$ °C) 24h measurement at 15 minutes interval | 28                    | 41  | $35 \pm 3.0$ |
| Barmparesos et al. 2018 Greece [29] | October to March 2017 | Elementary                        | 1                    | 1                          | Window opening (Under cement roof)       | Yes       | Hygrometer sensor (TinyTag plus, $\pm 0.6$ °C) 24h measurement at 15 minutes interval | 35                    | 78  | $59 \pm 6.4$ |
| Barmparesos et al. 2018 Greece [29] | April to June 2017    | Elementary                        | 1                    | 1                          | Window opening (Under cement roof)       | Yes       | Hygrometer sensor (TinyTag plus, $\pm 0.6$ °C) 24h measurement at 15 minutes interval | 30                    | 57  | $45 \pm 4.6$ |
| Verrielle et al. 2016 France [30]   | 2009 to 2013          | Elementary High school University | 10                   | 10                         | HVAC with CO2 and occupancy sensors      | Yes       | Hygrometer sensor (Q Trak) 4.5 days measurement. Measured at 2m height                | 28                    | 58  | $44 \pm 5.8$ |
| Istrate et al. 2016 Romania [31]    | July to August 2015   | High school                       | 1                    | 2                          | HVAC                                     | N/A       | N/A                                                                                   | N/A                   | N/A | N/A          |

| References<br>Location                          | Period (year)                         | Type of<br>schools              | Number<br>of schools | Number of<br>total samples | Type of<br>ventilation                    | Occupancy | Measurement protocol                                                                | Relative humidity (%) |     |             |
|-------------------------------------------------|---------------------------------------|---------------------------------|----------------------|----------------------------|-------------------------------------------|-----------|-------------------------------------------------------------------------------------|-----------------------|-----|-------------|
|                                                 |                                       |                                 |                      |                            |                                           |           |                                                                                     | Min                   | Max | AM $\pm$ SD |
| Zhong et al.<br>2016 USA [32]                   | October 2015<br>to March 2016         | Elementary<br>and K8<br>schools | 37                   | 144                        | HVAC                                      | Both      | N/A                                                                                 | N/A                   | N/A | 30 $\pm$ 11 |
| Stamp et al.<br>2020<br>United<br>Kingdom [33]  | 2017                                  | Secondary                       | 1                    | 1                          | Mechanical<br>and by<br>opening<br>window | Yes       | N/A                                                                                 | N/A                   | N/A | N/A         |
| Madureira et al.<br>2015 Portugal<br>[34]       | November to<br>March, 2011<br>to 2013 | Elementary                      | 20                   | 73                         | Opening<br>window                         | Yes       | Hygrometer (IAQ-CALC<br>TSI 7545 monitor, $\pm$ 0.6<br>°C)                          | 34                    | 74  | 54          |
| Csobod et al.<br>Northern<br>Europe [35]        | Non heating<br>season<br>2014         | Nurseries and<br>elementary     | 13                   | 39                         | Window<br>opening                         | Yes       | Hygrometer sensor (Catec<br>Klimabox)<br>5 days on continuous<br>(Monday to Friday) | 6.0                   | 56  | 33          |
| Csobod et al.<br>Western Europe<br>[35]         | Non heating<br>season<br>2014         | Nurseries and<br>elementary     | 26                   | 78                         | Window<br>opening                         | Yes       | Hygrometer sensor (Catec<br>Klimabox)<br>5 days on continuous<br>(Monday to Friday) | 23                    | 64  | 38          |
| Csobod et al.<br>Central-Eastern<br>Europe [35] | Non heating<br>season<br>2014         | Nurseries and<br>elementary     | 44                   | 132                        | Window<br>opening                         | Yes       | Hygrometer sensor (Catec<br>Klimabox)<br>5 days on continuous<br>(Monday to Friday) | 20                    | 64  | 38          |
| Csobod et al.<br>Southern<br>Europe [35]        | Non heating<br>season<br>2014         | Nurseries and<br>elementary     | 31                   | 93                         | Window<br>opening                         | Yes       | Hygrometer sensor (Catec<br>Klimabox)<br>5 days on continuous<br>(Monday to Friday) | 25                    | 80  | 51          |
| Oliveira et al.<br>2016 Portugal<br>[36]        | April to June<br>2013                 | Kindergarten                    | 1                    | 1                          | Window<br>opening                         | Yes       | Hygrometer sensor (TG<br>502 GrayWolf)<br>63 days consecutive                       | 20                    | 71  | 43          |
| Oliveira et al.<br>2016 Portugal<br>[36]        | April to June<br>2013                 | Kindergarten                    | 1                    | 1                          | Window<br>opening                         | Yes       | Hygrometer sensor (TG<br>502 GrayWolf)<br>63 days consecutive                       | 25                    | 74  | 54          |

| References<br>Location                                       | Period (year)                                            | Type of<br>schools | Number<br>of schools | Number of<br>total samples | Type of<br>ventilation | Occupancy   | Measurement protocol                                                                                                  | Relative humidity (%) |     |              |
|--------------------------------------------------------------|----------------------------------------------------------|--------------------|----------------------|----------------------------|------------------------|-------------|-----------------------------------------------------------------------------------------------------------------------|-----------------------|-----|--------------|
|                                                              |                                                          |                    |                      |                            |                        |             |                                                                                                                       | Min                   | Max | AM $\pm$ SD  |
| Oliveira et al.<br>2017 Portugal<br>[37]                     | April to June<br>2013                                    | Kindergarten       | 2                    | 2                          | Window<br>opening      | Yes         | Hygrometer sensor (Testo<br>mini data-logger 174H)<br>7 weeks on continuous                                           | 20                    | 71  | 48 $\pm$ 22  |
| Zivkovic et al.<br>2015 Serbia<br>[38]                       | December<br>2011 to Jun<br>2012<br>Heating<br>season     | Mixed              | 4                    | 5                          | Window<br>opening      | Yes         | N/A                                                                                                                   | 32                    | 49  | 36 $\pm$ 8.2 |
| Zivkovic et al.<br>2015 Serbia<br>[38]                       | December<br>2011 to Jun<br>2012<br>Non-heating<br>season | Mixed              | 4                    | 5                          | Window<br>opening      | Yes         | N/A                                                                                                                   | 45                    | 70  | 57 $\pm$ 8.8 |
| Loreti et al.<br>2016 Italy [39]                             | 2016                                                     | Secondary          | 1                    | 5                          | Window<br>opening      | Yes         | Hygrometer sensor<br>DH206-2 Delta-Ohm data-<br>logger during morning<br>classes<br>1 minute interval                 | 46                    | 55  | N/A          |
| Aguilar et al.<br>2022 [1]                                   | Winter 2021                                              | University         | 1                    | 9                          | Window<br>opening      | Yes         | Hygrometer sensor, 10<br>minutes before lecture<br>start.<br>3 sensors per room, at 0.6<br>meter                      | 16                    | 94  | 58 $\pm$ 21  |
| de la Hoz –<br>Torres et al.<br>2022 Portugal,<br>Spain [40] | Fall 2021                                                | University         | 2                    | 12                         | Window<br>opening      | Yes         | Hygrometer sensor, FHAD<br>46- C41A AHLBORN, 1.5<br>to 2.5 hours on continuous,<br>1 minute interval, at 0.6<br>meter | 20                    | 50  | 38 $\pm$ 7.3 |
| Heracleous et al.<br>2019 Cyprus<br>[41]                     | Winter 2018                                              | Secondary          | 1                    | 4                          | Window<br>opening      | Both period | Hygrometer sensor<br>UX100-003 HOBO, 1<br>week on continuous, 1<br>minute interval                                    | 37                    | 70  | N/A          |

| References<br>Location                       | Period (year)              | Type of<br>schools | Number<br>of schools | Number of<br>total samples | Type of<br>ventilation | Occupancy   | Measurement protocol                                                               | Relative humidity (%) |     |             |
|----------------------------------------------|----------------------------|--------------------|----------------------|----------------------------|------------------------|-------------|------------------------------------------------------------------------------------|-----------------------|-----|-------------|
|                                              |                            |                    |                      |                            |                        |             |                                                                                    | Min                   | Max | AM $\pm$ SD |
| Korsavi et al.<br>2019 England<br>[42]       | Year long<br>2017 and 2018 | Elementary         | 8                    | 31                         | Window<br>opening      | Yes         | Hygrometer SWEMA, 2<br>days on continuous, 5<br>minutes interval, at 1.1<br>meters | N/A                   | N/A | N/A         |
| Oldham et al.<br>2020, United<br>States [43] | Fall, spring<br>2018       | Elementary         | 5                    | 5                          | Window<br>opening      | Both period | Thermistor, 5 days on<br>continuous                                                | 23                    | 72  | N/A         |

**1.3 Table S3: Thermal comfort assessment in schools in Europe and North America since 2010**

| References location                   | Period (year) | Type of schools | Number of schools<br>Number of students | Type of ventilation | Method                                                                                                                                | Measured parameters                                                                                                                                                                                                                                                                                                                                                                                                                                                                             | Results                                                                                                                                                                                                                |
|---------------------------------------|---------------|-----------------|-----------------------------------------|---------------------|---------------------------------------------------------------------------------------------------------------------------------------|-------------------------------------------------------------------------------------------------------------------------------------------------------------------------------------------------------------------------------------------------------------------------------------------------------------------------------------------------------------------------------------------------------------------------------------------------------------------------------------------------|------------------------------------------------------------------------------------------------------------------------------------------------------------------------------------------------------------------------|
| Campano-Laborda et al. 2020 Spain [2] | Winter 2020   | Secondary       | 8<br>977 students<br>12-17 years old    | Opening window      | -Physical and operational characterization of the indoor environment<br>-Thermal sensation vote 7 scale ASHRAE<br>Clothing insulation | Indoor:<br>-air temperature (Pt 100, $\pm 0.3^{\circ}\text{C}$ )<br>-surface temperatures (Thermocouple type K, $\pm 0.3^{\circ}\text{C}$ )<br>-mean radiant temperature (MRT) measured with a globe thermometer ( $\pm 1.5^{\circ}\text{C}$ )<br>-operative temperature measured with a globe thermometer ( $\pm 1.5^{\circ}\text{C}$ )<br>-relative humidity (capacitive $\pm 2\%$ )<br>-air velocity (hot wire, $\pm 0.03\text{ m/s}$ )<br><br>Outdoor:<br>-air temperature<br>-air velocity | <u>MRT</u> :<br>Closed windows: $21 \pm 2.6^{\circ}\text{C}^*$<br>Closed windows/open doors: $22 \pm 1.7^{\circ}\text{C}$<br>Open windows: $20 \pm 1.7^{\circ}\text{C}^*$<br><br><u>PMV</u> : +0.3<br><u>PPD</u> : 81% |

| References location                   | Period (year)  | Type of schools | Number of schools<br>Number of students     | Type of ventilation              | Method                                                                                                                                | Measured parameters                                                                                                                                                                                                                                                                                                                                                                                                                                                                       | Results                                                                                                                                                                                                                                                                                                                                |
|---------------------------------------|----------------|-----------------|---------------------------------------------|----------------------------------|---------------------------------------------------------------------------------------------------------------------------------------|-------------------------------------------------------------------------------------------------------------------------------------------------------------------------------------------------------------------------------------------------------------------------------------------------------------------------------------------------------------------------------------------------------------------------------------------------------------------------------------------|----------------------------------------------------------------------------------------------------------------------------------------------------------------------------------------------------------------------------------------------------------------------------------------------------------------------------------------|
| Campano-Laborda et al. 2020 Spain [2] | Midseason 2020 | Secondary       | 8<br>977 students<br>12-17 years old        | Opening window                   | -Physical and operational characterization of the indoor environment<br>-Thermal sensation vote 7 scale ASHRAE<br>Clothing insulation | Indoor:<br>-air temperature (Pt 100, ( $\pm 0.3^{\circ}\text{C}$ )<br>-surface temperatures (Thermocouple type K, $\pm 0.3^{\circ}\text{C}$ )<br>-mean radiant temperature (MRT) measured with a globe thermometer ( $\pm 1.5^{\circ}\text{C}$ )<br>-operative temperature measured with a globe thermometer ( $\pm 1.5^{\circ}\text{C}$ )<br>-relative humidity (capacitive $\pm 2\%$ )<br>-air velocity (hot wire, $\pm 0.03$ m/s)<br><br>Outdoor:<br>-air temperature<br>-air velocity | <u>MRT:</u><br>Closed windows: $23 \pm 2.9^{\circ}\text{C}^*$<br>Open windows: $23 \pm 3.7^{\circ}\text{C}^*$<br><br>PMV: +0.38<br>PPD: 85%                                                                                                                                                                                            |
| Papadopoulos et al. 2020 Greece [5]   | Winter 2019    | University      | 1<br>198 students<br>More than 18 years old | Opening window<br>1 Lecture hall | Rational approach<br>Thermal sensation vote 7 scale ASHRAE, Clothing insulation<br>Height, weight to estimation of metabolic rate     | Indoor:<br>-air temperature ( $\pm 0.5^{\circ}\text{C}$ )<br>- mean radiant temperature (MRT) estimated with surface temperatures ( $\pm 0.5^{\circ}\text{C}$ ) and thermal imaging camera<br>-relative humidity ( $\pm 5\%$ )<br>-air velocity ( $\pm 1.5\%$ RMS)                                                                                                                                                                                                                        | <u>T<sub>op</sub>:</u><br>Period 1: $21.49 \pm 1.17$<br>Period 2: $21.64 \pm 0.58$<br>Period 3: $24.42 \pm 2.51$<br><br><u>PMV:</u><br>Period 1: $-0.09 \pm 0.19$<br>Period 2: $0.04 \pm 0.17$<br>Period 3: $0.49 \pm 0.09$<br><br><u>PPD:</u><br>Period 1: $5.89 \pm 0.83$<br>Period 2: $5.55 \pm 0.75$<br>Period 3: $10.20 \pm 2.00$ |



| References location                    | Period (year) | Type of schools | Number of schools<br>Number of students          | Type of ventilation           | Method                                                                                                                            | Measured parameters                                                                                                                                                                                                                                                                                                                                                                                                  | Results                                                                                                                                                                                                                                                                                                                                   |
|----------------------------------------|---------------|-----------------|--------------------------------------------------|-------------------------------|-----------------------------------------------------------------------------------------------------------------------------------|----------------------------------------------------------------------------------------------------------------------------------------------------------------------------------------------------------------------------------------------------------------------------------------------------------------------------------------------------------------------------------------------------------------------|-------------------------------------------------------------------------------------------------------------------------------------------------------------------------------------------------------------------------------------------------------------------------------------------------------------------------------------------|
|                                        |               |                 |                                                  |                               |                                                                                                                                   | -operative temperature (Top) (mean of MRT and air temperature and air velocity <0.2 m/s)<br>Outdoor:<br>-air temperature<br>-relative humidity                                                                                                                                                                                                                                                                       |                                                                                                                                                                                                                                                                                                                                           |
| Papadopoulos et al. 2020<br>Greece [5] | Winter 2019   | University      | 1<br>198 students<br>More than 18 years old      | Opening window<br>1 Classroom | Rational approach<br>Thermal sensation vote 7 scale ASHRAE, Clothing insulation<br>Height, weight to estimation of metabolic rate | Indoor:<br>-air temperature ( $\pm 0.5^{\circ}\text{C}$ )<br>- mean radiant temperature (MRT) estimated with surface temperatures ( $\pm 0.5^{\circ}\text{C}$ ) and thermal imaging camera<br>-relative humidity ( $\pm 5\%$ )<br>-air velocity ( $\pm 1.5\%$ RMS)<br>-operative temperature (Top) (mean of MRT and air temperature and air velocity <0.2 m/s)<br>Outdoor:<br>-air temperature<br>-relative humidity | <u>T<sub>op</sub></u> :<br>Period 1: $21.19 \pm 0.66$<br>Period 2: $19.97 \pm 0.69$<br>Period 3: $19.2 \pm 0.97$<br><br><u>PMV</u> :<br>Period 1: $0.17 \pm 0.24$<br>Period 2: $-0.26 \pm 0.19$<br>Period 3: $-0.45 \pm 0.27$<br><br><u>PPD</u> :<br>Period 1: $6.77 \pm 4.20$<br>Period 2: $7.16 \pm 2.34$<br>Period 3: $10.80 \pm 4.87$ |
| Papazoglou et al. 2019<br>Greece [8]   | Winter 2016   | University      | 1 lecture hall<br>19 students<br>16-18 years old | Opening window                | Rational approach<br>Thermal sensation vote 7 scale ASHRAE, Clothing insulation<br>Height, weight to estimate metabolic rate      | Indoor:<br>Microclimatic station<br>- Air temperature<br>- Air velocity<br>- Operative temperature (height 1.2 m, with the probe clamped at $30^{\circ}$ from the vertical,                                                                                                                                                                                                                                          | <u>T<sub>op</sub></u> : $17.37^{\circ}\text{C}$ to $20.29^{\circ}\text{C}$<br><u>MRT</u> : $17.67^{\circ}\text{C}$ to $20.33^{\circ}\text{C}$<br><u>PMV</u> : -1.77 to -0.73<br><u>PPD</u> : 16.16 % to 65.32 %<br>Actual mean vote (AMV) results and Percentage dissatisfied (PD) are -0.32 and 7.07% respectively                       |

| References location            | Period (year)          | Type of schools | Number of schools<br>Number of students | Type of ventilation | Method                                                                                                                       | Measured parameters                                                                                                                                                                                                                                                                   | Results                                                                                                                                                                                                              |
|--------------------------------|------------------------|-----------------|-----------------------------------------|---------------------|------------------------------------------------------------------------------------------------------------------------------|---------------------------------------------------------------------------------------------------------------------------------------------------------------------------------------------------------------------------------------------------------------------------------------|----------------------------------------------------------------------------------------------------------------------------------------------------------------------------------------------------------------------|
|                                |                        |                 |                                         |                     | Measurement in 1.5 hour total with a 5 minutes time interval                                                                 | simulating a sitting person)<br>-relative humidity                                                                                                                                                                                                                                    |                                                                                                                                                                                                                      |
| Buratti et al. 2018 Italy [10] | Spring and Autumn 2015 | University      | 7<br>331 students<br>16-18 years old    | Opening window      | Rational approach<br>Thermal sensation vote 7 scale ASHRAE, Clothing insulation<br>Height, weight to estimate metabolic rate | Indoor:<br>-air temperature ( $\pm 0.17$ °C)<br>- mean radiant temperature measured with a globe thermometer ( $\pm 0.17$ °C)<br>-surface temperature ( $\pm 0.17$ °C)<br>-relative humidity<br><br>Outdoor:<br>-air temperature ( $\pm 0.10$ °C)<br>-relative humidity ( $\pm 2\%$ ) | <u>MRT: 24.42 °C</u><br><u>PMV Man: 0.11</u><br><u>PPD Man: 12.50 %</u><br><u>PMV Woman: 0.20</u><br><u>PPD Woman: 13.20%</u><br>The study also incorporated a 13 points scale into the questionnaire of PMV and PPD |

| References location                    | Period (year)          | Type of schools | Number of schools<br>Number of students | Type of ventilation | Method                                                                                                                        | Measured parameters                                                                                                                                                                                                                                                                                                                                                                                                           | Results                                                                                                                                                                                                                                                                                                                                                                                                                                                                                                                                                                                                |
|----------------------------------------|------------------------|-----------------|-----------------------------------------|---------------------|-------------------------------------------------------------------------------------------------------------------------------|-------------------------------------------------------------------------------------------------------------------------------------------------------------------------------------------------------------------------------------------------------------------------------------------------------------------------------------------------------------------------------------------------------------------------------|--------------------------------------------------------------------------------------------------------------------------------------------------------------------------------------------------------------------------------------------------------------------------------------------------------------------------------------------------------------------------------------------------------------------------------------------------------------------------------------------------------------------------------------------------------------------------------------------------------|
| Vilcekova et al. 2017<br>Slovakia [15] | Autumn 2016            | Elementary      | 34 students<br>9-15 years old           | Opening window      | Rational approach<br>Thermal sensation vote<br>7 scale ASHRAE,<br>Estimation on clothing insulation and metabolic information | Indoor (multifunctional device):<br>-air temperature ( $\pm 0.3^{\circ}\text{C}$ )<br>- mean radiant temperature (MRT)<br>analyzed during 24h before monitoring survey with a globe thermometer<br>- Amplitude $< 1^{\circ}\text{C}$ and safety considerations:<br>MRT=T $\pm 1^{\circ}\text{C}$<br>-air velocity ( $\pm 0.03$ m/s)<br>-relative humidity ( $\pm 2\%$ )<br>Outdoor:<br>-air temperature<br>-relative humidity | <u>MRT:</u><br>Class 1: $23.1^{\circ}\text{C}$ to $25.1^{\circ}\text{C}$<br>Class 2: $23.6^{\circ}\text{C}$ to $25.6^{\circ}\text{C}$<br>Class 3: $22.8^{\circ}\text{C}$ to $24.8^{\circ}\text{C}$<br>Class 4: $22.8^{\circ}\text{C}$ to $24.8^{\circ}\text{C}$<br>Class 5: $22.1^{\circ}\text{C}$ to $24.1^{\circ}\text{C}$<br><u>PMV:</u><br>Class 1: 0.09 to 0.33<br>Class 2: 0.21 to 0.45<br>Class 3: 0 to 0.24<br>Class 4: 0.01 to 0.25<br>Class 5: -0.16 to - 0.04<br><u>PPD:</u><br>Class 1: 5 to 6%<br>Class 2: 6 to 9%<br>Class 3: 5 to 6%<br>Class 4: 5 to 6%<br>Class 5: 5 to 6%<br><br>N/A |
| De Giuli et al. 2015 Italy [17]        | Spring and Autumn 2010 | Elementary      | 3<br>62 students<br>9-11 years old      | Opening window      | Rational approach<br>Adaptative model<br>4 points scale question on temperature sensation (remove all neutral choice)         | Indoor:<br>-air temperature<br>- plane radiant temperature measured according to the ISO 7726 (1998)<br>-air velocity<br>-relative humidity<br>- Operative temperature (Top)<br><br>Outdoor:<br>-air temperature<br>-relative humidity                                                                                                                                                                                        | <u>MRT:</u><br>Day 1: N/A<br>Day 2: $13.7^{\circ}\text{C}$ to $14.1^{\circ}\text{C}$<br>Day 3: $21.9^{\circ}\text{C}$ to $22.1^{\circ}\text{C}$<br><u>T<sub>op</sub>:</u><br>Day 1: $21.4^{\circ}\text{C}$ to $23.1^{\circ}\text{C}$<br>Day 2: $20^{\circ}\text{C}$ to $24.7^{\circ}\text{C}$<br>Day 3: $25^{\circ}\text{C}$ to $28.9^{\circ}\text{C}$<br>PMV:<br>Day 1: -0.1 to 0.4<br>Day 2: -0.5 to 0.6<br>Day 3: 0.7 to 1.2<br>PPD:<br>Day 1: 5% to 8%<br>Day 2: 7% to 13%                                                                                                                         |

| References location                      | Period (year) | Type of schools | Number of schools<br>Number of students      | Type of ventilation | Method                                                                                                                                                                 | Measured parameters                                                                                                                                                                                                                          | Results                                                                                                                                                                                                                                                                                                                                                                              |
|------------------------------------------|---------------|-----------------|----------------------------------------------|---------------------|------------------------------------------------------------------------------------------------------------------------------------------------------------------------|----------------------------------------------------------------------------------------------------------------------------------------------------------------------------------------------------------------------------------------------|--------------------------------------------------------------------------------------------------------------------------------------------------------------------------------------------------------------------------------------------------------------------------------------------------------------------------------------------------------------------------------------|
|                                          |               |                 |                                              |                     |                                                                                                                                                                        |                                                                                                                                                                                                                                              | Day 3: 5% to 34%<br><br>More than 60% children felt too warm in midseason, and they generally didn't feel cold in cold season                                                                                                                                                                                                                                                        |
| Pereira et al.<br>2014 Portugal.<br>[20] | Winter 2010   | Secondary       | 1<br>45 teenager students                    | N/A                 | Rational approach<br>Thermal sensation vote<br>7 scale ASHRAE,<br>Simulation on clothing<br>insulation and metabolic<br>information                                    | Indoor:<br>-air temperature (T)<br>- mean radiant<br>temperature (MRT)<br>analyzed during 24h<br>before monitoring survey<br>- Amplitude <1°C<br>MRT=T ± 1°C<br>-relative humidity<br><br>Outdoor:<br>-air temperature<br>-relative humidity | PMV and PPD were not calculated but simulated based on the thermal sensation vote of occupants                                                                                                                                                                                                                                                                                       |
| Fabbri et al.<br>2013 Italy [44]         | Autumn        | Kindergarten    | 2 classrooms<br>78 students<br>4-5 years old | Opening window      | Rational approach<br>Thermal sensation vote<br>6 scale ASHRAE ("Very cold, -3, had been removed),<br>Estimation on clothing<br>insulation and metabolic<br>information | Indoor (microclimatic station):<br>-air temperature<br>- mean radiant<br>temperature measured with a globe thermometer<br>-air velocity<br>-relative humidity                                                                                | PMV -4 years old children:<br>- at 9h30: +0.68<br>- at 11h50: +0.57<br>- at 15h00: +0.71<br>PMV- 5 years old children:<br>- at 9h30: +0.59<br>- at 11h50: +0.35<br>- at 15h00: +0.67<br><br>PPD-4 years old children:<br>- at 9h30: 14.77%<br>- at 11h50: 11.69%<br>- at 15h00: 15.73%<br>PPD- 5 years old children:<br>- at 9h30: 12.32%<br>- at 11h50: 7.52%<br>- at 15h00: 14.34% |

| References location              | Period (year) | Type of schools | Number of schools<br>Number of students | Type of ventilation | Method                                                            | Measured parameters                                                                                                                 | Results                                                                                                                                                                                                                                                                                                                                 |
|----------------------------------|---------------|-----------------|-----------------------------------------|---------------------|-------------------------------------------------------------------|-------------------------------------------------------------------------------------------------------------------------------------|-----------------------------------------------------------------------------------------------------------------------------------------------------------------------------------------------------------------------------------------------------------------------------------------------------------------------------------------|
|                                  |               |                 |                                         |                     |                                                                   |                                                                                                                                     | Beside an interactive way to illustrate the answer to 4-5 years old children, this study also made a comparison between PMV and PPD recorded by a datalogger and PMV and PPD results from children's answer. On average, there was an overestimation of +0.59 and +0.62 in PMV from the data-logger for 4 and 5 years old respectively. |
| Loreti et al.<br>2016 Italy [39] | 2016          | Secondary       | 105 students<br>13 year old pupils      | Window opening      | Thermal Microclimate HD32.1, measured during the morning classes. | <ul style="list-style-type: none"> <li>- air velocity</li> <li>- relative humidity</li> <li>- MRT</li> <li>- T operative</li> </ul> | T <sub>op</sub> : 20.1 °C to 21.4<br>PMV mean: -0.5 to 0.06                                                                                                                                                                                                                                                                             |

**1.4 Table S4: Measurements of background noise level (dB) in schools in Europe and North America since 2010**

| References<br>Location                   | Period<br>(years)           | Type of<br>schools      | Number of<br>schools | Number of<br>classrooms | Classrooms'<br>total volume<br>(m <sup>3</sup> ) | Type of<br>ventilation     | Occupancy | Measurement<br>protocol                                                                  | Noise equivalent level (dBA) |     |          |
|------------------------------------------|-----------------------------|-------------------------|----------------------|-------------------------|--------------------------------------------------|----------------------------|-----------|------------------------------------------------------------------------------------------|------------------------------|-----|----------|
|                                          |                             |                         |                      |                         |                                                  |                            |           |                                                                                          | Min                          | Max | AM ± SD  |
| Harcarova et al.<br>2020 Slovakia<br>[3] | Winter 2020                 | Elementary              | 1                    | 1                       | N/A                                              | Window opening             | Yes       | 1st class sound<br>level meter<br>1 hour<br>continuously                                 | 72                           | 85  | 79 ± 5.4 |
| Harcarova et al.<br>2020 Slovakia<br>[3] | Winter 2020                 | Elementary              | 1                    | 1                       | N/A                                              | Window opening             | Yes       | 1st class sound<br>level meter<br>1 hour<br>continuously                                 | 59                           | 86  | 74 ± 12  |
| Smith et al.<br>2019 USA<br>[45]         | 3 times in a<br>school year | Elementary<br>Secondary | 104                  | 208                     | N/A                                              | HVAC*                      | Yes       | 2nd class sound<br>level meter<br>2 days<br>continuously<br>10 seconds time<br>interval  | N/A                          | N/A | 66       |
| Smith et al.<br>2019 USA<br>[45]         | 3 times in a<br>school year | Elementary<br>Secondary | 104                  | 208                     | N/A                                              | HVAC*                      | No        | 2nd class sound<br>level meters<br>2 days<br>continuously<br>10 seconds time<br>interval | N/A                          | N/A | 49       |
| Smith et al.<br>2019 USA<br>[45]         | 3 times in a<br>school year | Elementary<br>Secondary | 41                   | 82                      | N/A                                              | Centralized<br>ventilation | Yes       | 2nd class sound<br>level meter<br>2 days<br>continuously<br>10 seconds time<br>interval  | N/A                          | N/A | 67       |
| Smith et al.<br>2019 USA [45]            | 3 times in a<br>school year | Elementary<br>Secondary | 41                   | 82                      | N/A                                              | Centralized<br>ventilation | No        | 2nd class sound<br>level meter<br>2 days<br>continuously<br>10 seconds time<br>interval  | N/A                          | N/A | 48       |

| References<br>Location                    | Period<br>(years)           | Type of<br>schools              | Number of<br>schools | Number of<br>classrooms | Classrooms'<br>total volume<br>(m <sup>3</sup> ) | Type of<br>ventilation     | Occupancy | Measurement<br>protocol                                                                                                                       | Noise equivalent level (dBA) |     |          |
|-------------------------------------------|-----------------------------|---------------------------------|----------------------|-------------------------|--------------------------------------------------|----------------------------|-----------|-----------------------------------------------------------------------------------------------------------------------------------------------|------------------------------|-----|----------|
|                                           |                             |                                 |                      |                         |                                                  |                            |           |                                                                                                                                               | Min                          | Max | AM ± SD  |
| Smith et al.<br>2019 USA [45]             | 3 times in a<br>school year | Elementary<br>Secondary         | 59                   | 118                     | N/A                                              | Indoor unit<br>ventilators | Yes       | 2nd class sound<br>level meter<br>2 days<br>continuously<br>10 seconds time<br>interval                                                       | N/A                          | N/A | 66       |
| Smith et al.<br>2019 USA [45]             | 3 times in a<br>school year | Elementary<br>Secondary         | 59                   | 118                     | N/A                                              | Indoor unit<br>ventilators | No        | 2nd class sound<br>level meter<br>2 days<br>continuously<br>10 seconds time<br>interval                                                       | N/A                          | N/A | 51       |
| Buratti et al.<br>2018 Italy [10]         | Spring-<br>Autumn<br>2015   | University                      | 1                    | 7                       | 202 – 1331.6                                     | Mechanical<br>ventilation  | Yes       | 12-sided speaker<br>and microphones<br>(Standard ISO<br>3382)<br>1 minute spot<br>measurement                                                 | N/A                          | N/A | 42       |
| Vilcekova et al.<br>2017 Slovakia<br>[15] | Autumn<br>2016              | Elementary                      | 5                    | 5                       | 112.84                                           | Window opening             | Yes       | 1st class sound<br>level meter<br>1 week<br>continuously<br>10 minutes time<br>interval                                                       | 48                           | 98  | 75 ± 4.2 |
| Chetoni et al.<br>2016 Italy [46]         | 2015                        | Secondary<br>and High<br>school | 8                    | 24                      | 121 - 236                                        | Window opening             | No        | 2 microphones in<br>each classroom,<br>1 at the center of<br>the room, 1 near<br>the window (at<br>1m distance)<br>30 minutes<br>measurements | 23                           | 63  | N/A      |

| References<br>Location                | Period<br>(years) | Type of<br>schools | Number of<br>schools | Number of<br>classrooms | Classrooms'<br>total volume<br>(m <sup>3</sup> ) | Type of<br>ventilation | Occupancy | Measurement<br>protocol          | Noise equivalent level (dBA) |     |          |
|---------------------------------------|-------------------|--------------------|----------------------|-------------------------|--------------------------------------------------|------------------------|-----------|----------------------------------|------------------------------|-----|----------|
|                                       |                   |                    |                      |                         |                                                  |                        |           |                                  | Min                          | Max | AM ± SD  |
| Klatte et al.<br>2010 Germany<br>[51] | 2010              | Secondary          | 8                    | 21                      | 231                                              | N/A                    | No        | N/A                              | 22                           | 39  | N/A      |
| Shield et al.<br>2015 England<br>[52] | 2015              | Secondary          | 13                   | 86                      | 161                                              | N/A                    | No        | Norsonics N140<br>sound analyzer | N/A                          | N/A | 34 ± 5.8 |

HVAC: Heat, ventilation and air conditioning; AM: arithmetic mean; SD: standard deviation



**1.5 Table S5: Measurement of clarity index in schools across Europe and North America from 2010**

| Parameters                          | References location            | Type of school | Number of classrooms | Number of points | Ventilation            | Occupancy | Measurement protocol                                           | Results |     |             |
|-------------------------------------|--------------------------------|----------------|----------------------|------------------|------------------------|-----------|----------------------------------------------------------------|---------|-----|-------------|
|                                     |                                |                |                      |                  |                        |           |                                                                | Min     | Max | AM $\pm$ SD |
| Clarity index (C50) (dB)            | Buratti et al. 2018 Italy [10] | University     | 7                    | 12               | Mechanical ventilation | Yes       | 12-sided speaker and microphones (ISO 3382)                    | N/A     | N/A | -0,73       |
| Clarity index (C50) (dB) at 250 Hz  | Loreti et al. 2016 Italy [39]  | Secondary      | 1                    | 18               | Windows opening        | Yes       | 3 sound sources + 18 microphones around the class (ISO 3382.2) | N/A     | N/A | -5,48       |
| Clarity index (C50) (dB) at 500 Hz  | Loreti et al. 2016 Italy [39]  | Secondary      | 1                    | 18               | Windows opening        | Yes       | 3 sound sources + 18 microphones around the class (ISO 3382.2) | N/A     | N/A | -5,87       |
| Clarity index (C50) (dB) at 1000 Hz | Loreti et al. 2016 Italy [39]  | Secondary      | 1                    | 18               | Windows opening        | Yes       | 3 sound sources + 18 microphones around the class (ISO 3382.2) | N/A     | N/A | 5,55        |
| Clarity index (C50) (dB) at 2000 Hz | Loreti et al. 2016 Italy [39]  | Secondary      | 1                    | 18               | Windows opening        | Yes       | 3 sound sources + 18 microphones around the class (ISO 3382.2) | N/A     | N/A | -6,28       |
| Clarity index (C50) (dB) at 4000 Hz | Loreti et al. 2016 Italy [39]  | Secondary      | 1                    | 18               | Windows opening        | Yes       | 3 sound sources + 18 microphones around the class (ISO 3382.2) | N/A     | N/A | -5,74       |
| Clarity index (C50) (dB) at 125 Hz  | Russo et al. 2019 Italy [47]   | Secondary      | 1                    | 9                | Windows opening        | No        | 12-sided speaker and microphones (ISO 3382)                    | N/A     | N/A | -0,48       |
| Clarity index (C50) (dB) at 250 Hz  | Russo et al. 2019 Italy [47]   | Secondary      | 1                    | 9                | Windows opening        | No        | 12-sided speaker and microphones (ISO 3382)                    | N/A     | N/A | -2,21       |
| Clarity index (C50) (dB) at 500 Hz  | Russo et al. 2019 Italy [47]   | Secondary      | 1                    | 9                | Windows opening        | No        | 12-sided speaker and microphones (ISO 3382)                    | N/A     | N/A | -1,48       |

| Parameters                          | References location                    | Type of school | Number of classrooms | Number of points | Ventilation     | Occupancy | Measurement protocol                                                                                          | Results |      |                 |
|-------------------------------------|----------------------------------------|----------------|----------------------|------------------|-----------------|-----------|---------------------------------------------------------------------------------------------------------------|---------|------|-----------------|
|                                     |                                        |                |                      |                  |                 |           |                                                                                                               | Min     | Max  | AM $\pm$ SD     |
| Clarity index (C50) (dB) at 1000 Hz | Russo et al. 2019 Italy [47]           | Secondary      | 1                    | 9                | Windows opening | No        | 12-sided speaker and microphones (ISO 3382)                                                                   | N/A     | N/A  | -1,78           |
| Clarity index (C50) (dB) at 2000 Hz | Russo et al. 2019 Italy [47]           | Secondary      | 1                    | 9                | Windows opening | No        | 12-sided speaker and microphones (ISO 3382)                                                                   | N/A     | N/A  | -1              |
| Clarity index (C50) (dB) at 4000 Hz | Russo et al. 2019 Italy [47]           | Secondary      | 1                    | 9                | Windows opening | No        | 12-sided speaker and microphones (ISO 3382)                                                                   | N/A     | N/A  | 0,28            |
| Clarity index (C50) (dB) at 8000 Hz | Russo et al. 2019 Italy [47]           | Secondary      | 1                    | 9                | Windows opening | No        | 12-sided speaker and microphones (ISO 3382)                                                                   | N/A     | N/A  | 3,06            |
| SNR                                 | Sarantopoulos et al. 2020, Greece [48] | Elementary     | 10                   | 31               | N/A             | Yes       |                                                                                                               |         |      |                 |
| STI                                 | Mikulski et al. 2011 Poland [49]       | Elementary     | 1                    | 160              | N/A             | No        | The impulse method was applied, using a pseudo-random MLS signal (EN ISO 3382-2:2008)                         | 0.53    | 0.74 | 0.61 $\pm$ 0.02 |
| STI                                 | Shield et al. 2015 England [52]        | Secondary      | 86                   | 161              | N/A             | No        | Calculated from impulse responses generated by balloon bursts and captured by a Norsonics N140 sound analyzer | N/A     | N/A  | 0.71 $\pm$ 0.05 |
| C50                                 | Shield et al. 2015 England [52]        | Secondary      | 86                   | 161              | N/A             | No        | Calculated from impulse responses generated by balloon bursts and captured by a                               | N/A     | N/A  | 4.77 $\pm$ 2.04 |

| Parameters | References location | Type of school | Number of classrooms | Number of points | Ventilation | Occupancy | Measurement protocol          | Results |     |         |
|------------|---------------------|----------------|----------------------|------------------|-------------|-----------|-------------------------------|---------|-----|---------|
|            |                     |                |                      |                  |             |           |                               | Min     | Max | AM ± SD |
|            |                     |                |                      |                  |             |           | Norsonics N140 sound analyzer |         |     |         |

**1.6 Table S6: Measurements of reverberation time in schools across Europe and North America from 2010**

| Time Frequency (Hz) | References location                | Type of school        | Number of schools | Number of classrooms | Classrooms' total volume (m <sup>3</sup> ) | Type of ventilation    | Occupancy | Measurement protocol                                                                                                                                                                                                                                                                                                                                          | Reverberation time (s)         |
|---------------------|------------------------------------|-----------------------|-------------------|----------------------|--------------------------------------------|------------------------|-----------|---------------------------------------------------------------------------------------------------------------------------------------------------------------------------------------------------------------------------------------------------------------------------------------------------------------------------------------------------------------|--------------------------------|
| T30<br>125 Hz       | Russo et al.<br>2019 Italy<br>[47] | Secondary             | 1                 | 1                    | 180                                        | Window opening         | No        | Impulsive method (blank gun shots)<br>9 microphones placed at 1.2 m (students' seated positions) and 1m from the walls (According to the ISO 3382-2 standard)<br>Decay of the sound pressure level as a function of time in a point of an environment after the cessation of the sound source, by reverse integration of the responses to the square impulse. | 1.5                            |
| T30<br>250 Hz       | Russo et al.<br>2019 Italy<br>[47] | Secondary             | 1                 | 1                    | 180                                        | Window opening         | No        |                                                                                                                                                                                                                                                                                                                                                               | 1.1                            |
| T30<br>500 Hz       | Russo et al.<br>2019 Italy<br>[47] | Secondary             | 1                 | 1                    | 180                                        | Window opening         | No        |                                                                                                                                                                                                                                                                                                                                                               | 0.8                            |
| T30<br>1000 Hz      | Russo et al.<br>2019 Italy<br>[47] | Secondary             | 1                 | 1                    | 180                                        | Window opening         | No        |                                                                                                                                                                                                                                                                                                                                                               | 0.7                            |
| T30<br>2000 Hz      | Russo et al.<br>2019 Italy<br>[47] | Secondary             | 1                 | 1                    | 180                                        | Window opening         | No        |                                                                                                                                                                                                                                                                                                                                                               | 0.7                            |
| T30<br>4000 Hz      | Russo et al.<br>2019 Italy<br>[47] | Secondary             | 1                 | 1                    | 180                                        | Window opening         | No        |                                                                                                                                                                                                                                                                                                                                                               | 0.6                            |
| T30<br>8000 Hz      | Russo et al.<br>2019 Italy<br>[47] | Secondary             | 1                 | 1                    | 180                                        | Window opening         | No        |                                                                                                                                                                                                                                                                                                                                                               | 0.5                            |
| T30<br>250 Hz       | Buratti et al.<br>2018 Italy [10]  | University            | 1                 | 7                    | 201 to 1546                                | Mechanical ventilation | Yes       | 12-sided loudspeaker at teacher's desk<br>Impulsive white noise (source)<br>4 to 6 microphones ( $\pm 2$ dB, frequency range 3.15–20 000 Hz) placed at 1.1 m (students' seated positions)<br>(According to the ISO 3382-2 standard)                                                                                                                           | AM: 1.1<br>Range: 0.95 to 1.46 |
| T60                 | Chetoni et al.<br>2016 Italy [46]  | Secondary High school | 8                 | 24                   | 121 to 236                                 | Window opening         | Yes       | Impulsive method (Maximum length sequence – MLS)                                                                                                                                                                                                                                                                                                              | AM: 1.9<br>Range: 0.88 to 2.88 |

| Time Frequency (Hz) | References location              | Type of school | Number of schools | Number of classrooms | Classrooms' total volume (m <sup>3</sup> ) | Type of ventilation | Occupancy | Measurement protocol                                                                                                                                                                                                                                        | Reverberation time (s) |
|---------------------|----------------------------------|----------------|-------------------|----------------------|--------------------------------------------|---------------------|-----------|-------------------------------------------------------------------------------------------------------------------------------------------------------------------------------------------------------------------------------------------------------------|------------------------|
|                     |                                  |                |                   |                      |                                            |                     |           | 2 microphones in each classroom, 1 at the center of the room, 1 near the window (at 1m distance)<br>(According to the ISO 3382-2 standard)                                                                                                                  |                        |
| T60 250 Hz          | Loreti et al. 2015 Italy [39]    | Secondary      | 1                 | 1                    | 172                                        | Window opening      | Yes       | Impulsive method (Maximum length sequence – MLS)<br>3 sound sources at 1.2m of height (teacher's desk, center, corner of the listening area)<br>18 microphones at 1.1m of height placed throughout the classroom.<br>(According to the ISO 3382-2 standard) | 1.1                    |
| T60 500 Hz          | Loreti et al. 2015 Italy [39]    | Secondary      | 1                 | 1                    | 172                                        | Window opening      | Yes       |                                                                                                                                                                                                                                                             | 1.1                    |
| T60 1000 Hz         | Loreti et al. 2015 Italy [39]    | Secondary      | 1                 | 1                    | 172                                        | Window opening      | Yes       |                                                                                                                                                                                                                                                             | 0.9                    |
| T60 2000 Hz         | Loreti et al. 2015 Italy [39]    | Secondary      | 1                 | 1                    | 172                                        | Window opening      | Yes       |                                                                                                                                                                                                                                                             | 0.9                    |
| T60 4000 H          | Loreti et al. 2015 Italy [39]    | Secondary      | 1                 | 1                    | 172                                        | Window opening      | Yes       |                                                                                                                                                                                                                                                             | 1.0                    |
| T20 250 Hz          | Loreti et al. 2015 Italy [39]    | Secondary      | 1                 | 1                    | 172                                        | Window opening      | Yes       |                                                                                                                                                                                                                                                             | 1.2 ± 0.1              |
| T20 500 Hz          | Loreti et al. 2015 Italy [39]    | Secondary      | 1                 | 1                    | 172                                        | Window opening      | Yes       |                                                                                                                                                                                                                                                             | 1.2± 0.1               |
| T20 1000 Hz         | Loreti et al. 2015 Italy [39]    | Secondary      | 1                 | 1                    | 172                                        | Window opening      | Yes       |                                                                                                                                                                                                                                                             | 1.3 ± 0.1              |
| T20 2000 Hz         | Loreti et al. 2015 Italy [39]    | Secondary      | 1                 | 1                    | 172                                        | Window opening      | Yes       |                                                                                                                                                                                                                                                             | 1.5 ± 0.1              |
| Tm,f mean           | Mikulski et al. 2011 Poland [49] | Elementary     | 5                 | 1                    | 160                                        | N/A                 | No        | Impulsive method (Maximum length sequence – MLS)<br>(According to the ISO 3382-2 standard)                                                                                                                                                                  | 1.14                   |
| Tw,f mean           | Mikulski et al. 2011 Poland [49] | Elementary     | 5                 | 1                    | 160                                        | N/A                 | No        | Impulsive method (Maximum length sequence – MLS)<br>(According to the ISO 3382-2 standard)                                                                                                                                                                  | 1.13                   |

| <b>Time Frequency (Hz)</b> | <b>References location</b>           | <b>Type of school</b> | <b>Number of schools</b> | <b>Number of classrooms</b> | <b>Classrooms' total volume (m<sup>3</sup>)</b> | <b>Type of ventilation</b> | <b>Occupancy</b> | <b>Measurement protocol</b>                                                                  | <b>Reverberation time (s)</b> |
|----------------------------|--------------------------------------|-----------------------|--------------------------|-----------------------------|-------------------------------------------------|----------------------------|------------------|----------------------------------------------------------------------------------------------|-------------------------------|
| T30                        | Kristiansen et al. 2011 Denmark [50] | Secondary             | 13                       | 38                          | 200 - 320                                       | N/A                        | No               | Impulse decay method (According to the ISO 3382-2 standard)                                  | 0.38 – 0.86                   |
| T20 250 – 2000 Hz          | Klatte et al. 2010 Germany [51]      | Secondary             | 8                        | 21                          | 231                                             | N/A                        | No               | N/A                                                                                          | 0.51 – 1.11                   |
| T20                        | Shield et al. 2015 England [52]      | Secondary             | 13                       | 86                          | 161                                             | N/A                        | No               | Impulse responses generated by balloon bursts, measured with a Norsonics N140 sound analyzer | 0.65 ± 0.17                   |

**1.7 Table S7: Measurements of carbon dioxide (CO<sub>2</sub>) in schools in Europe and North America since 2010**

| Reference Location                    | Period (years)       | Type of schools                                     | Number of schools | Number of total samples | Type of ventilation                      | Occupancy | Measurement protocol                                                                       | CO <sub>2</sub> concentration (ppm) |      |            |
|---------------------------------------|----------------------|-----------------------------------------------------|-------------------|-------------------------|------------------------------------------|-----------|--------------------------------------------------------------------------------------------|-------------------------------------|------|------------|
|                                       |                      |                                                     |                   |                         |                                          |           |                                                                                            | Min                                 | Max  | AM±SD      |
| Becerra et al. 2020 Spain [53]        | March 2020           | Kindergarten, elementary, secondary and high school | 4                 | 8                       | Window opening                           | Yes       | NDIR sensor<br>Range: 0 – 5000 ppm, ± 50 ppm, 2 days measurement with a 2 minutes interval | N/A                                 | N/A  | 1434 ± 197 |
| Becerra et al. 2020 Spain [53]        | March 2020           | Secondary and high school                           | 5                 | 10                      | Window opening                           | Yes       | NDIR sensor<br>Range: 0 – 5000 ppm, ± 50 ppm, 2 days measurement with a 2 minutes interval | N/A                                 | N/A  | 1611 ± 234 |
| Campano-Laborda et al. 2020 Spain [2] | Winter 2020          | Secondary                                           | 8                 | 564                     | Window opening                           | Yes       | Hygrometer<br>30 minutes continuously                                                      | N/A                                 | N/A  | 1951 ± 552 |
| Campano-Laborda et al. 2020 Spain [2] | Midseason 2020       | Secondary                                           | 8                 | 564                     | Window opening                           | Yes       | Hygrometer<br>30 minutes continuously                                                      | N/A                                 | N/A  | 1267 ± 499 |
| Harcarova et al. 2020 Slovakia [3]    | Winter 2020          | Elementary                                          | 1                 | 1                       | Window opening                           | Yes       | Hygrometer<br>1 hour continuously                                                          | 732                                 | 1709 | 1238 ± 294 |
| Harcarova et al. 2020 Slovakia [3]    | Winter 2020          | Elementary                                          | 1                 | 1                       | Window opening                           | Yes       | Hygrometer<br>1 hour continuously                                                          | 705                                 | 1615 | 1415 ± 224 |
| Langer et al. 2020 Sweden [4]         | October - March 2017 | Elementary                                          | 10                | 10                      | Window opening<br>Mechanical ventilation | Yes       | Hygrometer<br>1 week continuous<br>2 minutes time interval                                 | N/A                                 | N/A  | N/A        |
| Papadopoulos et al. 2020 Greece [5]   | December 2019        | University                                          | 1                 | 10                      | Window opening                           | Yes       | Hygrometer<br>30 minutes continuously                                                      | 502                                 | 2500 | 1920       |
| Papadopoulos et al. 2020 Greece [5]   | December 2019        | University                                          | 1                 | 10                      | Window opening                           | Yes       | Hygrometer<br>30 minutes continuously                                                      | 523                                 | 2253 | 1316       |

| Reference Location                  | Period (years)                  | Type of schools            | Number of schools | Number of total samples | Type of ventilation                         | Occupancy | Measurement protocol                                                                                    | CO <sub>2</sub> concentration (ppm)                                  |           |           |
|-------------------------------------|---------------------------------|----------------------------|-------------------|-------------------------|---------------------------------------------|-----------|---------------------------------------------------------------------------------------------------------|----------------------------------------------------------------------|-----------|-----------|
|                                     |                                 |                            |                   |                         |                                             |           |                                                                                                         | Min                                                                  | Max       | AM±SD     |
| Stamp et al. 2020 UK [33]           | 2017                            | Secondary                  | 1                 | 1                       | Window opening<br>Mechanical ventilation    | Yes       | Measurement continuously<br>5 minutes time interval                                                     | N/A                                                                  | N/A       | N/A       |
| Ahmed et al. 2019 Finland [6]       | Heating and cooling season 2019 | Daycare and elementary     | 7                 | 1                       | HVAC*                                       | Yes       | Hygrometer<br>1 month continuously                                                                      | 6 out of 7 building achieved category I concentration (<750 ppm)     |           |           |
| Brdaric et al. 2019 Croatia [7]     | February - May 2014             | Elementary                 | 20                | 60                      | Window opening                              | Yes       | Hygrometer<br>1 week continuously<br>1 minute time interval                                             | 500                                                                  | 5383      | 2093      |
| Sivanantham et al. 2021 France [54] | 2013 – 2017                     | Kindergarten<br>Elementary | 301               | 67299***                | Window opening<br>Mechanical ventilation    | Yes       | NDIR sensor<br>Monday to Friday continuously<br>10 minutes time interval                                | N/A                                                                  | 2872 ± 44 | 1418 ± 26 |
| Erlandson et al. 2019 USA [25]      | Yearlong 2019                   | University                 | 1                 | 61                      | HVAC                                        | Yes       | Hygrometer sensor (Q-trak TSI)<br>8 hours period with 1 minute interval                                 | 271                                                                  | 986       | 493 ± 1.3 |
| Simanic, et al. 2019 Sweden [9]     | Heating and cooling season 2018 | Elementary                 | 7                 | 145                     | HVAC*                                       | Yes       | Hygrometer<br>1 week continuously, from 7h30 to 16h00                                                   | 60 of 61 classrooms fulfilled the Sweden guideline limit of 1000 ppm |           |           |
| Barmparesos et al. 2018 Greece [29] | June 2016 to July 2017          | Elementary                 | 1                 | 2                       | Window opening<br>(Under green roof system) | Yes       | Portable sensor (Tongdy)<br>range 0 – 2000 ppm ± 40 ppm<br>24 hours continuously<br>15 minutes interval | 396                                                                  | 1996      | 591 ± 226 |



| Reference Location                              | Period (years)            | Type of schools | Number of schools | Number of total samples | Type of ventilation                | Occupancy | Measurement protocol                                                                           | CO <sub>2</sub> concentration (ppm) |      |           |
|-------------------------------------------------|---------------------------|-----------------|-------------------|-------------------------|------------------------------------|-----------|------------------------------------------------------------------------------------------------|-------------------------------------|------|-----------|
|                                                 |                           |                 |                   |                         |                                    |           |                                                                                                | Min                                 | Max  | AM±SD     |
| Barmparesos et al. 2018 Greece [29]             | June 2016 to July 2017    | Elementary      | 1                 | 4                       | Window opening (Under cement roof) | Yes       | Portable sensor (Tongdy) range 0 – 2000 ppm ± 40 ppm 24 hours continuously 15 minutes interval | 360                                 | 1999 | 640 ± 228 |
| Vornanen-Winqvist et al. 2018 Finland [11]      | April to September 2016   | Secondary       | 1                 | 2                       | HVAC*                              | Yes       | Hygrometer 1 week continuously                                                                 | 399                                 | 597  | 424       |
| Vornanen-Winqvist et al. 2020 Finland [12]      | May 2016 to March 2017    | School          | 6                 | 6                       | HVAC*                              | Yes       | Hygrometer 1 week continuously                                                                 | 402                                 | 829  | 458       |
| Zecevic et al. 2018 Bosnia and Herzegovina [13] | November to December 2016 | University      | 1                 | 1                       | Window opening                     | Yes       | Hygrometer 3 period of 1 week continuously 10 seconds time interval                            | N/A                                 | 2310 | 1235      |
| Zecevic et al. 2018 Bosnia and Herzegovina [13] | May 2017                  | University      | 1                 | 1                       | Window opening                     | Yes       | Hygrometer 3 period of 1 week continuously 10 seconds time interval                            | N/A                                 | 1592 | 965       |
| Oliveira et al. 2017 Portugal [55]              | April to June 2013        | Kindergarten    | 2                 | 2                       | Window opening                     | Yes       | Hygrometer (Testo mini data-logger 174H) 7 weeks continuously                                  | 381                                 | 2003 | N/A       |
| Senitkova et al. 2017 Czech Republic [28]       | 2017                      | Nursery         | 3                 | 1                       | Window opening                     | Yes       | NDIR sensor Range 0 – 10000 ppm, ± 100 ppm 1 day continuously                                  | N/A                                 | N/A  | 380       |
| Senitkova et al. 2017 Czech Republic [28]       | 2017                      | Nursery         | 3                 | 1                       | Window opening                     | Yes       | NDIR sensor Range 0 – 10000 ppm, ± 100 ppm                                                     | N/A                                 | N/A  | 1270      |

| Reference Location                        | Period (years) | Type of schools | Number of schools | Number of total samples | Type of ventilation | Occupancy | Measurement protocol                                                         | CO <sub>2</sub> concentration (ppm) |      |            |
|-------------------------------------------|----------------|-----------------|-------------------|-------------------------|---------------------|-----------|------------------------------------------------------------------------------|-------------------------------------|------|------------|
|                                           |                |                 |                   |                         |                     |           |                                                                              | Min                                 | Max  | AM±SD      |
|                                           |                |                 |                   |                         |                     |           | 1 day continuously                                                           |                                     |      |            |
| Senitkova et al. 2017 Czech Republic [28] | 2017           | Nursery         | 3                 | 1                       | Window opening      | Yes       | NDIR sensor<br>Range 0 – 10000 ppm, ± 100 ppm<br>1 day continuously          | N/A                                 | N/A  | 2850       |
| Senitkova et al. 2017 Czech Republic [28] | 2017           | Nursery         | 3                 | 1                       | Window opening      | Yes       | NDIR sensor<br>Range 0 – 10000 ppm, ± 100 ppm<br>1 day continuously          | N/A                                 | N/A  | 380        |
| Senitkova et al. 2017 Czech Republic [28] | 2017           | Nursery         | 3                 | 1                       | Window opening      | Yes       | NDIR sensor<br>Range 0 – 10000 ppm, ± 100 ppm<br>1 day continuously          | N/A                                 | N/A  | 1520       |
| Senitkova et al. 2017 Czech Republic [28] | 2017           | Nursery         | 3                 | 1                       | Window opening      | Yes       | NDIR sensor<br>Range 0 – 10000 ppm, ± 100 ppm<br>1 day continuously          | N/A                                 | N/A  | 3420       |
| Vilcekova et al. 2017 Slovakia [15]       | Autumn 2016    | Elementary      | 1                 | 1                       | Window opening      | Yes       | Testo 435-4<br>NDIR sensor<br>1 week continuously<br>3 minutes time interval | 957                                 | 1597 | 1261 ± 134 |
| Vilcekova et al. 2017 Slovakia [15]       | Autumn 2016    | Elementary      | 1                 | 1                       | Window opening      | Yes       | Testo 435-4<br>NDIR sensor<br>1 week continuously<br>3 minutes time interval | 797                                 | 1418 | 1212 ± 154 |
| Vilcekova et al. 2017 Slovakia [15]       | Autumn 2016    | Elementary      | 1                 | 1                       | Window opening      | Yes       | Testo 435-4<br>NDIR sensor<br>1 week continuously<br>3 minutes time interval | 711                                 | 1502 | 1122 ± 186 |

| Reference Location                  | Period (years)             | Type of schools           | Number of schools | Number of total samples | Type of ventilation                       | Occupancy | Measurement protocol                                                                                  | CO <sub>2</sub> concentration (ppm) |      |            |
|-------------------------------------|----------------------------|---------------------------|-------------------|-------------------------|-------------------------------------------|-----------|-------------------------------------------------------------------------------------------------------|-------------------------------------|------|------------|
|                                     |                            |                           |                   |                         |                                           |           |                                                                                                       | Min                                 | Max  | AM±SD      |
| Vilcekova et al. 2017 Slovakia [15] | Autumn 2016                | Elementary                | 1                 | 1                       | Window opening                            | Yes       | Testo 435-4 NDIR sensor<br>1 week continuously<br>3 minutes time interval                             | 652                                 | 1778 | 1242 ± 288 |
| Vilcekova et al. 2017 Slovakia [15] | Autumn 2016                | Elementary                | 1                 | 1                       | Window opening                            | Yes       | Testo 435-4 NDIR sensor<br>1 week continuously<br>3 minutes time interval                             | 577                                 | 1787 | 984 ± 281  |
| Zhong et al. 2017 USA [32]          | October 2015 to March 2016 | Elementary and K8 schools | 37                | 144                     | HVAC                                      | Both      | 1 to 2 days continuously                                                                              | N/A                                 | N/A  | N/A        |
| Canha et al. 2016 France [26]       | January to April 2010      | Nursery and Elementary    | 10                | 44                      | Window opening and Mechanical ventilation | Yes       | NDIR sensor range:0 – 5000 ppm, accuracy ± 3%<br>Monday to Friday continuously<br>10 minutes interval | N/A                                 | N/A  | 1200 ± 400 |
| Canha et al. 2016 France [26]       | April to June 2010         | Nursery and Elementary    | 7                 | 44                      | Window opening and Mechanical ventilation | Yes       | NDIR sensor range:0 – 5000 ppm, accuracy ± 3%<br>Monday to Friday continuously<br>10 minutes interval | N/A                                 | N/A  | 1400 ± 400 |
| Loreti et al. 2016 Italy [39]       | 2016                       | Secondary                 | 1                 | 5                       | Window opening                            | Yes       | Thermal Microclimate HD32.1<br>1 day continuously                                                     | N/A                                 | N/A  | 1732 ± 222 |

| Reference Location                 | Period (years)        | Type of schools                   | Number of schools | Number of total samples | Type of ventilation                                  | Occupancy | Measurement protocol                                   | CO <sub>2</sub> concentration (ppm) |        |              |
|------------------------------------|-----------------------|-----------------------------------|-------------------|-------------------------|------------------------------------------------------|-----------|--------------------------------------------------------|-------------------------------------|--------|--------------|
|                                    |                       |                                   |                   |                         |                                                      |           |                                                        | Min                                 | Max    | AM±SD        |
| Nunes et al. 2016 Portugal [56]    | April to June 2014    | Nursery and kindergarten (Rural)  | 3                 | 5                       | Window opening                                       | Yes       | Haz- Scanner NDIR sensor 2 to 4 days continuously      | 691                                 | 3490   | 1301 ± 374   |
| Nunes et al. 2016 Portugal [56]    | April to June 2014    | Nursery and kindergarten (Urban)  | 1                 | 3                       | Window opening                                       | Yes       | Haz- Scanner NDIR sensor 2 to 4 days continuously      | 715                                 | 4571   | 2629 ± 822   |
| Nunes et al. 2016 Portugal [56]    | April to June 2014    | Nursery and kindergarten (Rural)  | 3                 | 5                       | Window opening                                       | No        | Haz- Scanner NDIR sensor 2 to 4 days continuously      | 622                                 | 1718   | 735 ± 31     |
| Nunes et al. 2016 Portugal [56]    | April to June 2014    | Nursery and kindergarten (Urban)  | 1                 | 3                       | Window opening                                       | No        | Haz- Scanner NDIR sensor 2 to 4 days continuously      | 708                                 | 3127   | 992 ± 89     |
| Verriele et al. 2016 France [30]   | 2009 to 2013          | Elementary High school University | 10                | 10                      | HVAC with CO <sub>2</sub> and occupancy sensors      | Yes       | Hygrometer Monday to Friday At 2m height               | N/A                                 | 2762   | N/A          |
| Branco et al. 2015 Portugal [16]   | February to June 2014 | Daycare                           | 4                 | 10                      | Window opening                                       | Yes       | NDIR sensor 24h continuously Occupancy period          | 271                                 | 3110   | 604 ± 351    |
| De Giuli et al. 2015 Italy [17]    | February 2011         | Elementary                        | 3                 | 8                       | Windows opening                                      | Yes       | Hygrometer Spot measurement                            | 510**                               | 2095** | 1494 ± 437** |
| De Giuli et al. 2015 Italy [17]    | April 2011            | Elementary                        | 3                 | 8                       | Windows opening                                      | Yes       | Hygrometer Spot measurement                            | 318**                               | 1897** | 1167 ± 461** |
| De Giuli et al. 2015 Italy [17]    | June 2011             | Elementary                        | 3                 | 8                       | Windows opening                                      | Yes       | Hygrometer Spot measurement                            | 80**                                | 591**  | 246 ± 156**  |
| Haverinen et al. 2015 Finland [23] | January to April 2009 | Elementary                        | 70                | 70                      | 12 Air handling unit 15 Fan coil 44 Unit ventilators | Yes       | Hygrometer 3 days continuously 5 minutes time interval | N/A                                 | N/A    | N/A          |

| Reference Location                  | Period (years)                 | Type of schools          | Number of schools | Number of total samples | Type of ventilation                                      | Occupancy | Measurement protocol                                                                                                  | CO <sub>2</sub> concentration (ppm)                                                                                                                                                                        |      |                                                                                                                             |
|-------------------------------------|--------------------------------|--------------------------|-------------------|-------------------------|----------------------------------------------------------|-----------|-----------------------------------------------------------------------------------------------------------------------|------------------------------------------------------------------------------------------------------------------------------------------------------------------------------------------------------------|------|-----------------------------------------------------------------------------------------------------------------------------|
|                                     |                                |                          |                   |                         |                                                          |           |                                                                                                                       | Min                                                                                                                                                                                                        | Max  | AM±SD                                                                                                                       |
| Haverinen et al. 2015 Finland [23]  | October 2009 to December 2009  | Elementary               | 27                | 27                      | 3 Air handling unit<br>9 Fan coil<br>14 Unit ventilators | Yes       | Hygrometer<br>3 days continuously<br>5 minutes time interval                                                          | N/A                                                                                                                                                                                                        | N/A  | N/A                                                                                                                         |
| Haverinen et al. 2015 Finland [23]  | January 2010 to May 2010       | Elementary               | 27                | 27                      | 3 Air handling unit<br>9 Fan coil<br>14 Unit ventilators | Yes       | Hygrometer<br>3 days continuously<br>5 minutes time interval                                                          | N/A                                                                                                                                                                                                        | N/A  | N/A                                                                                                                         |
| Madureira et al. 2015 Portugal [34] | November to March 2011 to 2013 | Elementary               | 20                | 73                      | Opening window                                           | Yes       | NDIR sensor<br>Monday to Friday<br>5 minutes time interval                                                            | 829                                                                                                                                                                                                        | 3111 | 1469                                                                                                                        |
| Mainka et al. 2015 Poland [57]      | December 2013 to March 2014    | Nursery school           | 4                 | 8                       | Window opening                                           | Yes       | NDIR sensor (Az instruments 77535, range 0 – 10000 ppm, accuracy ± 100 ppm)<br>5 days continuously, 1 minute interval | Results presented according to PN-EN 13779 classification (in relation to outdoor CO <sub>2</sub> concentration)<br>IDA 1: ≤ 400 ppm<br>IDA 2: 400 – 600 ppm<br>IDA 3: 600 – 1000 ppm<br>IDA 4: ≥ 1000 ppm |      |                                                                                                                             |
| Pereira et al. 2015 Portugal [18]   | February and May 2010          | Secondary                | 1                 | 1                       | Window opening                                           | Yes       | Hygrometer<br>24h continuously                                                                                        | 374                                                                                                                                                                                                        | 4640 | 1927                                                                                                                        |
| Ramalho et al. 2015 France [58]     | September 2009 to July 2011    | Nursery and Kindergarten | 310               | 896                     | Window opening and mechanical ventilation                | Yes       | NDIR sensor<br>7 days continuously<br>10 minutes interval                                                             | 296                                                                                                                                                                                                        | 1953 | 736 ± 236                                                                                                                   |
| Toftum et al. 2015 Denmark [24]     | October to December 2009       | Elementary               | 88                | 88                      | 44 Window opening<br>10 Mechanical exhaust               | Yes       | IR sensor (Vaisala GMW22 (CO <sub>2</sub> range: 0-5000 ppm ± 100 ppm ± 2% of reading)                                | N/A                                                                                                                                                                                                        | N/A  | Median of maximum 20 min running average:<br>Windows opening: 2875<br>Mechanical exhaust: 2372<br>Mechanical balanced: 1344 |

| Reference Location                | Period (years)                 | Type of schools                 | Number of schools | Number of total samples | Type of ventilation                       | Occupancy | Measurement protocol                                                   | CO <sub>2</sub> concentration (ppm)                                                                                                     |      |            |
|-----------------------------------|--------------------------------|---------------------------------|-------------------|-------------------------|-------------------------------------------|-----------|------------------------------------------------------------------------|-----------------------------------------------------------------------------------------------------------------------------------------|------|------------|
|                                   |                                |                                 |                   |                         |                                           |           |                                                                        | Min                                                                                                                                     | Max  | AM±SD      |
|                                   |                                |                                 |                   |                         | 31 Mechanical balanced                    |           | Continuously varied from 4 – 35 days                                   |                                                                                                                                         |      |            |
| Csobod et al. 2014 Europe [35]    | Non heating season 2014        | Kindergarten                    | 25                | 25                      | Window opening and mechanical ventilation | Yes       | Hygrometer 5 days continuously (Monday to Friday)                      | 394                                                                                                                                     | 3530 | 1309 ± 892 |
| Csobod et al. 2014 Europe [35]    | Non heating season 2014        | Elementary                      | 300               | 300                     | Window opening and mechanical ventilation | Yes       | Hygrometer 5 days continuously (Monday to Friday)                      | 296                                                                                                                                     | 4960 | 1433 ± 856 |
| De Giuli et al. 2014 Italy [19]   | March to June 2012             | Elementary                      | 1                 | 12                      | Window opening                            | Yes       | Hygrometer 3 months continuously 5 minutes time interval               | Concentration reached up to 4000 ppm above outdoor concentration. After May 29, concentration below 800 ppm above outdoor concentration |      |            |
| Jovanovic et al. 2014 Serbia [27] | April 2012                     | Elementary                      | 1                 | 5                       | Window opening                            | Yes       | NDIR sensor (Testo 435-4, range 0-5000 ppm, ±50ppm) 8 days measurement | 562                                                                                                                                     | 592  | 575        |
| Pereira et al. 2014 Portugal [20] | April to May 2013              | Secondary                       | 1                 | 2                       | Window opening                            | No        | Hygrometer 2 weeks continuously                                        | < 10% compliance in 2 of 10 period of measurements                                                                                      |      |            |
| Rovelli et al. 2014 Italy [59]    | November 2011 to March 2012    | Elementary and secondary school | 4                 | 12                      | Window opening                            | Yes       | NDIR sensor, Monday to Friday continuously                             | 567                                                                                                                                     | 1191 | 891 ± 174  |
| Rovelli et al. 2014 Italy [59]    | November 2012 to February 2013 | Elementary and secondary school | 5                 | 15                      | Window opening                            | Yes       | NDIR sensor, Monday to Friday continuously                             | 698                                                                                                                                     | 1370 | 870 ± 181  |
| Alves et al. 2013 Portugal        | January 2012                   | Elementary                      | 1                 | 3                       | Window opening                            | Yes       | NDIR sensor                                                            | N/A                                                                                                                                     | N/A  | 2084 ± 577 |

| Reference Location              | Period (years)        | Type of schools | Number of schools | Number of total samples | Type of ventilation | Occupancy | Measurement protocol                      | CO <sub>2</sub> concentration (ppm) |        |              |
|---------------------------------|-----------------------|-----------------|-------------------|-------------------------|---------------------|-----------|-------------------------------------------|-------------------------------------|--------|--------------|
|                                 |                       |                 |                   |                         |                     |           |                                           | Min                                 | Max    | AM±SD        |
| [21]                            |                       |                 |                   |                         |                     |           | Monday to Friday continuously             |                                     |        |              |
| Alves et al. 2013 Portugal [21] | January 2012          | Elementary      | 1                 | 1                       | Window opening      | Yes       | NDIR sensor Monday to Friday continuously | N/A                                 | N/A    | 2144 ± 525   |
| Alves et al. 2013 Portugal [21] | January 2012          | Elementary      | 1                 | 2                       | Window opening      | Yes       | NDIR sensor Monday to Friday continuously | N/A                                 | N/A    | 3494 ± 835   |
| Alves et al. 2013 Portugal [21] | January 2012          | Daycare         | 1                 | 3                       | Window opening      | Yes       | NDIR sensor Monday to Friday continuously | N/A                                 | N/A    | 1766 ± 503   |
| De Giuli et al. 2012 Italy [22] | February to June 2010 | Elementary      | 7                 | 28                      | Window opening      | Yes       | Hygrometer Spot measurement               | 45**                                | 3635** | 1149 ± 798** |

HVAC: Heat, ventilation and air conditioning; NDIR: Nondispersive infrared detection; AM: arithmetic mean; SD: standard deviation; \*\*: concentration above outdoor concentration; \*\*\*: adjusted to the French stock of schools

**1.8 Table S8: Calculation of air change rate/ ventilation in schools across Europe and North America from 2010**

| References location                 | Period (years)             | Type of schools           | Number of schools | Number of total samples | Type of ventilation                       | Occupancy | Measurement protocol                                                                                                                                                                                                    | Air change rate/ ventilation rate |                     |                              |
|-------------------------------------|----------------------------|---------------------------|-------------------|-------------------------|-------------------------------------------|-----------|-------------------------------------------------------------------------------------------------------------------------------------------------------------------------------------------------------------------------|-----------------------------------|---------------------|------------------------------|
|                                     |                            |                           |                   |                         |                                           |           |                                                                                                                                                                                                                         | Min                               | Max                 | AM±SD                        |
| Sivanantham et al. 2021 France [54] | 2013 – 2017                | Kindergarten Elementary   | 301               | 67299***                | Windows opening Mechanical ventilation    | Yes       | NDIR sensor Monday to Friday continuously 10 minutes time interval                                                                                                                                                      | N/A                               | N/A                 | 0.8 h <sup>-1</sup>          |
| Barmparesos et al. 2018 Greece [29] | June 2016 to July 2017     | Elementary                | 1                 | 2                       | Window opening (Under green roof system)  | Yes       | Air exchange rate estimated with CO <sub>2</sub> concentration (Turanjanin et al. 2014)                                                                                                                                 | N/A                               | N/A                 | 0.11 to 0.29 h <sup>-1</sup> |
| Barmparesos et al. 2018 Greece [29] | June 2016 to July 2017     | Elementary                | 1                 | 4                       | Window opening (Under cement roof)        | Yes       | Air exchange rate estimated with CO <sub>2</sub> concentration (Turanjanin et al. 2014)                                                                                                                                 | N/A                               | N/A                 | 0.04 to 0.14 h <sup>-1</sup> |
| Zhong et al. 2017 USA [32]          | October 2015 to March 2016 | Elementary and K8 schools | 37                | 144                     | HVAC                                      | Both      | Calculated using measured CO <sub>2</sub> concentrations, room dimensions, occupancy data, and a time-dependent numerical mass balance model that simulated 15 min CO <sub>2</sub> concentrations over the study period | N/A                               | N/A                 | 1.4 ± 1.1 h <sup>-1</sup>    |
| Canha et al. 2016 France [26]       | January to April 2010      | Nursery and Elementary    | 17                | 44                      | Window opening and Mechanical ventilation | Yes       | Air exchange rate estimated with CO <sub>2</sub> concentration                                                                                                                                                          | 0.3 h <sup>-1</sup>               | 3.1 h <sup>-1</sup> | 1.4 ± 0.6 h <sup>-1</sup>    |



| References location             | Period (years)                | Type of schools        | Number of schools | Number of total samples | Type of ventilation                                        | Occupancy | Measurement protocol                                                                 | Air change rate/ ventilation rate |                      |                             |
|---------------------------------|-------------------------------|------------------------|-------------------|-------------------------|------------------------------------------------------------|-----------|--------------------------------------------------------------------------------------|-----------------------------------|----------------------|-----------------------------|
|                                 |                               |                        |                   |                         |                                                            |           |                                                                                      | Min                               | Max                  | AM±SD                       |
| Canha et al. 2016 France [26]   | April to June 2010            | Nursery and Elementary | 17                | 44                      | Window opening and Mechanical ventilation                  | No        | Air exchange rate estimated with CO <sub>2</sub> concentration                       | 0.03 h <sup>-1</sup>              | 0.54 h <sup>-1</sup> | 0.16 ± 0.13 h <sup>-1</sup> |
| Canha et al. 2016 France [26]   | April to June 2010            | Nursery and Elementary | 7                 | 44                      | Window opening and Mechanical ventilation                  | Yes       | Ventilation rate deduced from AER                                                    | 0.6 l/p/s                         | 8.2 l/p/s            | 2.9 ± 1.6 l/p/s             |
| Ramalho et al. 2015 France [58] | September 2009 to July 2011   | Nursery                | 80                | 896                     | Window opening and mechanical ventilation                  | Yes       | Calculated based on CO <sub>2</sub> measurements, represented nighttime air exchange | 0.04 h <sup>-1</sup>              | 1.00 h <sup>-1</sup> | 0.26 ± 0.20 h <sup>-1</sup> |
| Ramalho et al. 2015 France [58] | September 2009 to July 2011   | Kindergarten           | 57                | 57                      | Window opening and mechanical ventilation                  | Yes       | Calculated based on CO <sub>2</sub> measurements, represented nighttime air exchange | 0.03 h <sup>-1</sup>              | 0.40 h <sup>-1</sup> | 0.12 ± 0.07 h <sup>-1</sup> |
| Ramalho et al. 2015 France [58] | September 2009 to July 2011   | Elementary             | 334               | 334                     | Window opening and mechanical ventilation                  | Yes       | Calculated based on CO <sub>2</sub> measurements, represented nighttime air exchange | 0.03 h <sup>-1</sup>              | 1.28 h <sup>-1</sup> | 0.15 ± 0.13 h <sup>-1</sup> |
| Haverinen et al. Finland [23]   | January to April 2009         | Elementary             | 70                | 70                      | 12 Air handling unit<br>15 Fan coil<br>44 Unit ventilators | Yes       | Estimation with CO <sub>2</sub> concentration                                        | N/A                               | N/A                  | 3.6 ± 2.3 l/p/s             |
| Haverinen et al. Finland [23]   | October 2009 to December 2009 | Elementary             | 27                | 27                      | 3 Air handling unit<br>9 Fan coil<br>14 Unit ventilators   | Yes       | Estimation with CO <sub>2</sub> concentration                                        | N/A                               | N/A                  | 4.1 ± 3.0 l/p/s             |

| References location                     | Period (years)                 | Type of schools                 | Number of schools | Number of total samples | Type of ventilation                                      | Occupancy | Measurement protocol                                                          | Air change rate/ ventilation rate |                      |                             |
|-----------------------------------------|--------------------------------|---------------------------------|-------------------|-------------------------|----------------------------------------------------------|-----------|-------------------------------------------------------------------------------|-----------------------------------|----------------------|-----------------------------|
|                                         |                                |                                 |                   |                         |                                                          |           |                                                                               | Min                               | Max                  | AM±SD                       |
| Haverinen et al. Finland [23]           | January 2010 to May 2010       | Elementary                      | 27                | 27                      | 3 Air handling unit<br>9 Fan coil<br>14 Unit ventilators | Yes       | Estimation with CO <sub>2</sub> concentration                                 | N/A                               | N/A                  | 4.1 ± 2.6 l/p/s             |
| Csobod et al. 2014 Northern Europe [35] | Non heating season 2014        | Nurseries and elementary        | 13                | 39                      | Window opening                                           | Yes       | Calculated based on CO <sub>2</sub> measurements                              | 0.35 l/p/s                        | 11.2 l/p/s           | 3.39 l/p/s                  |
| Csobod et al. 2014 Northern Europe [35] | Non heating season 2014        | Nurseries and elementary        | 26                | 78                      | Window opening                                           | Yes       | Calculated based on CO <sub>2</sub> measurements                              | 0.17 l/p/s                        | 2.87 l/p/s           | 0.87 l/p/s                  |
| Csobod et al. 2014 Northern Europe [35] | Non heating season 2014        | Nurseries and elementary        | 44                | 132                     | Window opening                                           | Yes       | Calculated based on CO <sub>2</sub> measurements                              | 0.14 l/p/s                        | 13.33 l/p/s          | 1.82 l/p/s                  |
| Csobod et al. 2014 Northern Europe [35] | Non heating season 2014        | Nurseries and elementary        | 31                | 93                      | Window opening                                           | Yes       | Calculated based on CO <sub>2</sub> measurements                              | 0.12 l/p/s                        | 13.30 l/p/s          | 1.8 l/p/s                   |
| Rovelli et al. 2014 Italy [59]          | November 2011 to March 2012    | Elementary and secondary school | 4                 | 12                      | Window opening                                           | Yes       | Calculated based on CO <sub>2</sub> measurements                              | 0.10 h <sup>-1</sup>              | 0.6 h <sup>-1</sup>  | 0.35 ± 0.14 h <sup>-1</sup> |
| Rovelli et al. 2014 Italy [59]          | November 2012 to February 2013 | Elementary and secondary school | 5                 | 15                      | Window opening                                           | Yes       | Calculated based on CO <sub>2</sub> measurements                              | 0.24 h <sup>-1</sup>              | 0.61 h <sup>-1</sup> | 0.39 ± 0.11 h <sup>-1</sup> |
| Rovelli et al. 2014 Italy [59]          | November 2011 to March 2012    | Elementary and secondary school | 4                 | 12                      | Window opening                                           | Yes       | Calculated based on air exchange rate                                         | 0.7 l/p/s                         | 7.7 l/p/s            | 3.0 ± 1.6 l/p/s             |
| Rovelli et al. 2014 Italy [59]          | November 2012 to February 2013 | Elementary and secondary school | 5                 | 15                      | Window opening                                           | Yes       | Calculated based on air exchange rate                                         | 1.8 l/p/s                         | 5.6 l/p/s            | 3.2 ± 1.0 l/p/s             |
| Alves et al. 2013 Portugal [21]         | January 2012                   | Elementary and daycare          | 4                 | 9                       | Window opening                                           | Yes       | Estimation with CO <sub>2</sub> concentration (Griffiths and Eftekhari, 2008) | N/A                               | N/A                  | < 0.2 h <sup>-1</sup>       |

**1.9 Table S9: Measurements of formaldehyde in schools in Europe and North America since 2010**

| References<br>Location                  | Period<br>(years)              | Type of<br>school            | Number<br>of<br>schools | Number of<br>total<br>samples | Ventilation type | Occupancy | Measurement protocol                                  | Concentration ( $\mu\text{g}/\text{m}^3$ ) |     |               |
|-----------------------------------------|--------------------------------|------------------------------|-------------------------|-------------------------------|------------------|-----------|-------------------------------------------------------|--------------------------------------------|-----|---------------|
|                                         |                                |                              |                         |                               |                  |           |                                                       | Min                                        | Max | AM $\pm$ SD   |
| Langer et al.<br>2020 Sweden<br>[4]     | Autumn –<br>Winter<br>2020     | Elementary                   | 30                      | 30                            | HVAC             | Yes       | Diffusive sampler<br>5 days                           | 2                                          | 10  | N/A           |
| Langer et al.<br>2020 Sweden<br>[4]     | Autumn –<br>Winter<br>2020     | Elementary                   | 30                      | 30                            | Window opening   | Yes       | Diffusive sampler<br>5 days                           | 8                                          | 12  | N/A           |
| Branco et al.<br>2015 Portugal<br>[60]  | February –<br>November<br>2013 | Nurseries                    | 4                       | 10                            | Window opening   | Yes       | Electrochemical detection<br>from 2 to 9 measurements | 0                                          | 146 | $2 \pm 12$    |
| Erlandson et<br>al. 2019<br>USA [25]    | Year long<br>2019              | University                   | 1                       | 39                            | HVAC             | Yes       | Passive sampler (UMEx 100)<br>48h                     | 0.7                                        | 34  | $7.0 \pm 2.3$ |
| Stamp et al.<br>2020 UK [33]            | Year long<br>2020              | Secondary                    | 1                       | 18                            | HVAC             | Yes       | Diffusive sampler<br>5 days                           | 0.6                                        | 13  | 3.5           |
| Becerra et al.<br>2020 Spain<br>[53]    | Spring<br>2020                 | Elementary<br>Secondary      | 18                      | 18                            | Window opening   | Yes       | Diffusive sampler<br>5 days                           | 5.6                                        | 21  | N/A           |
| Villanueva et<br>al. 2018 Spain<br>[61] | Spring<br>2013                 | Kindergarten<br>(Rural)      | 18                      | 18                            | Window opening   | Yes       | Diffusive sampler<br>2 weeks continuously             | 25                                         | 53  | $36 \pm 9.9$  |
| Villanueva et<br>al. 2018 Spain<br>[61] | Spring<br>2013                 | Kindergarten<br>(Urban)      | 18                      | 18                            | Window opening   | Yes       | Diffusive sampler<br>2 weeks continuously             | 13                                         | 18  | $15 \pm 1.7$  |
| Villanueva et<br>al. 2018 Spain<br>[61] | Spring<br>2013                 | Kindergarten<br>(Industrial) | 18                      | 18                            | Window opening   | Yes       | Diffusive sampler<br>2 weeks continuously             | 19                                         | 30  | $25 \pm 4.0$  |
| Villanueva et<br>al. 2018 Spain<br>[61] | Spring<br>2013                 | Elementary<br>(Rural)        | 18                      | 18                            | Window opening   | Yes       | Diffusive sampler<br>2 weeks continuously             | 18                                         | 42  | $30 \pm 9.1$  |
| Villanueva et<br>al. 2018 Spain<br>[61] | Spring<br>2013                 | Elementary<br>(Urban)        | 18                      | 18                            | Window opening   | Yes       | Diffusive sampler<br>2 weeks continuously             | 11                                         | 66  | $31 \pm 23$   |

| References<br>Location                         | Period<br>(years)        | Type of<br>school        | Number<br>of<br>schools | Number of<br>total<br>samples | Ventilation type | Occupancy | Measurement protocol                                              | Concentration ( $\mu\text{g}/\text{m}^3$ ) |     |             |
|------------------------------------------------|--------------------------|--------------------------|-------------------------|-------------------------------|------------------|-----------|-------------------------------------------------------------------|--------------------------------------------|-----|-------------|
|                                                |                          |                          |                         |                               |                  |           |                                                                   | Min                                        | Max | AM $\pm$ SD |
| Villanueva et al. 2018 Spain [61]              | Spring 2013              | Elementary (Industrial)  | 18                      | 18                            | Window opening   | Yes       | Diffusive sampler<br>2 weeks continuously                         | 13                                         | 48  | $25 \pm 12$ |
| Canha et al. 2016 France [26]                  | January – June 2010      | Nurseries, elementary    | 17                      | 37                            | Window opening   | Yes       | Diffusive sampler<br>5 days continuously (Monday to Friday)       | N/A                                        | N/A | $28 \pm 16$ |
| Canha et al. 2016 France [26]                  | January – June 2010      | Nurseries, elementary    | 17                      | 14                            | HVAC*            | Yes       | Diffusive sampler<br>5 days continuously (Monday to Friday)       | N/A                                        | N/A | $18 \pm 7$  |
| Jovanovic et al. Serbia [27]                   | Spring 2012              | Elementary               | 1                       | 5                             | Window opening   | Yes       | Diffusive sampler of 8 days                                       | 43                                         | 88  | 64          |
| Madureira et al. 2016 Portugal [34]            | Heating season 2011-2013 | Elementary               | 20                      | 80                            | Window opening   | Yes       | Active sampling, air pump at 100L/min for a duration of 2.5 hours | 8.2                                        | 126 | 20          |
| Csobod et al. 2014 Northern Europe [35]        | Non heating season 2014  | Nurseries and elementary | 13                      | 39                            | Window opening   | Yes       | Diffusive sampler<br>5 days continuously (Monday to Friday)       | 0.3                                        | 2.2 | 1.4         |
| Csobod et al. 2014 Western Europe [35]         | Non heating season 2014  | Nurseries and elementary | 26                      | 78                            | Window opening   | Yes       | Diffusive sampler<br>5 days continuously (Monday to Friday)       | 0.3                                        | 15  | 2.3         |
| Csobod et al. 2014 Central-Eastern Europe [35] | Non heating season 2014  | Nurseries and elementary | 44                      | 132                           | Window opening   | Yes       | Diffusive sampler<br>5 days continuously (Monday to Friday)       | 0.6                                        | 40  | 5.0         |
| Csobod et al. 2014 Southern Europe [35]        | Non heating season 2014  | Nurseries and elementary | 31                      | 93                            | Window opening   | Yes       | Diffusive sampler<br>5 days continuously (Monday to Friday)       | 0                                          | 4.9 | 2.6         |
| Istrate et al. 2016 Romania [31]               | Summer 2016              | High school              | 1                       | 1                             | HVAC             | Yes       | Diffusive sampler<br>595 hours                                    | N/A                                        | N/A | 87          |
| Istrate et al. 2016 Romania                    | Summer 2016              | High school              | 1                       | 1                             | HVAC             | Yes       | Diffusive sampler<br>595 hours                                    | N/A                                        | N/A | 5.3         |

| References<br>Location                    | Period<br>(years)                 | Type of<br>school                       | Number<br>of<br>schools | Number of<br>total<br>samples | Ventilation type                                 | Occupancy | Measurement protocol                                                                                      | Concentration ( $\mu\text{g}/\text{m}^3$ ) |     |              |
|-------------------------------------------|-----------------------------------|-----------------------------------------|-------------------------|-------------------------------|--------------------------------------------------|-----------|-----------------------------------------------------------------------------------------------------------|--------------------------------------------|-----|--------------|
|                                           |                                   |                                         |                         |                               |                                                  |           |                                                                                                           | Min                                        | Max | AM $\pm$ SD  |
| [31]                                      |                                   |                                         |                         |                               |                                                  |           |                                                                                                           |                                            |     |              |
| Zhong et al.<br>2017 USA<br>[32]          | Heating<br>season<br>2016         | Elementary                              | 37                      | 144                           | HVAC                                             | Yes       | Electrochemical analyzer with<br>detection limit of $6 \mu\text{g}/\text{m}^3$ ,<br>minimum of 30 minutes | 6                                          | 32  | 8.6          |
| Sivanantham<br>et al. 2021<br>France [54] | 2013 – 2017                       | Kindergarten<br>Elementary              | 301                     | 67299*                        | Windows opening<br>Mechanical ventilation        | Yes       | Diffusive sampler<br>5 days continuously (Monday to<br>Friday)                                            | N/A                                        | N/A | $21 \pm 0.7$ |
| Verrielle et al.<br>2016 France<br>[30]   | 2009 to<br>2013                   | Elementary<br>High school<br>University | 10                      | 10                            | HVAC with $\text{CO}_2$ and<br>occupancy sensors | Yes       | Diffusive sampler<br>5 days continuously (Monday to<br>Friday)                                            | N/A                                        | N/A | $16 \pm 1.5$ |
| Ramvalho et al.<br>2015 France<br>[58]    | September<br>2009 to July<br>2011 | Nursery and<br>Kindergarten             | 310                     | 1353                          | Window opening and<br>mechanical ventilation     | Yes       | Diffusive sampler<br>5 days continuously (Monday to<br>Friday)                                            | 1.6                                        | 181 | $18 \pm 13$  |

HVAC: Heating, ventilation and air conditioning; AM: arithmetic mean; SD: standard deviation; \*: adjusted to the stock of French schools

**1.10 Table S10: Measurements of aldehydes in schools across Europe and North America from 2010**

| Substances   | References location                 | Period                   | Type of school            | N° of classroom | N° of point | Ventilation type | Occupancy | Measurement protocol                                  | Results (µg/m³) |      |                   |
|--------------|-------------------------------------|--------------------------|---------------------------|-----------------|-------------|------------------|-----------|-------------------------------------------------------|-----------------|------|-------------------|
|              |                                     |                          |                           |                 |             |                  |           |                                                       | Min             | Max  | AM ± SD           |
| Acetaldehyde | Becerra et al. 2020 Spain [53]      | Spring 2020              | Elementary Secondary      | 18              | 18          | Window opening   | Yes       | Diffusive passive sampler, collect duration of 5 days | -               | -    | Ranges: 3.3 - 5.6 |
| Acetaldehyde | Villanueva et al. 2018 Spain [61]   | Spring 2013              | Kindergarten (Rural)      | 18              | 18          | Window opening   | Yes       | Diffusive passive sampler, 2 weeks on continuous      | 4.7             | 10.1 | 6.8 ± 2           |
| Acetaldehyde | Villanueva et al. 2018 Spain [61]   | Spring 2013              | Kindergarten (Urban)      | 18              | 18          | Window opening   | Yes       | Diffusive passive sampler, 2 weeks on continuous      | 3.2             | 5.7  | 4.5 ± 1           |
| Acetaldehyde | Villanueva et al. 2018 Spain [61]   | Spring 2013              | Kindergarten (Industrial) | 18              | 18          | Window opening   | Yes       | Diffusive passive sampler, 2 weeks on continuous      | 3.8             | 7.4  | 6.0 ± 1.3         |
| Acetaldehyde | Villanueva et al. 2018 Spain [61]   | Spring 2013              | Elementary (Rural)        | 18              | 18          | Window opening   | Yes       | Diffusive passive sampler, 2 weeks on continuous      | 2.7             | 11   | 6.7 ± 2.7         |
| Acetaldehyde | Villanueva et al. 2018 Spain [61]   | Spring 2013              | Elementary (Urban)        | 18              | 18          | Window opening   | Yes       | Diffusive passive sampler, 2 weeks on continuous      | 3.2             | 8.3  | 5.4 ± 2.3         |
| Acetaldehyde | Villanueva et al. 2018 Spain [61]   | Spring 2013              | Elementary (Industrial)   | 18              | 18          | Window opening   | Yes       | Diffusive passive sampler, 2 weeks on continuous      | 4.2             | 13.3 | 6.7 ± 3.4         |
| Acetaldehyde | Canha et al. 2016 France [26]       | January – June 2010      | Nurseries, elementary     | 17              | 37          | Window opening   | Yes       | Diffusive passive sampler, 5 days                     | -               | -    | 6.9 ± 2.1         |
| Acetaldehyde | Canha et al. 2016 France [26]       | January – June 2010      | Nurseries, elementary     | 17              | 14          | HVAC*            | Yes       | Diffusive passive sampler, 5 days                     | -               | -    | 4.8 ± 1.6         |
| Acetaldehyde | Madureira et al. 2016 Portugal [34] | Heating season 2011-2013 | Elementary                | 20              | 80          | Window opening   | Yes       | Active sampler, air pump at 100L/min for 2.5 hours    | 1.92            | 64.6 | 9.3               |
| Acetaldehyde | Istrate et al. 2016 Romania [31]    | Summer 2016              | High school               | 1               | 1           | HVAC             | Yes       | Diffusive passive sampler, 595 hours on continuous    | -               | -    | 45.16             |

| Substances   | References location               | Period      | Type of school            | N° of classroom | N° of point | Ventilation type | Occupancy | Measurement protocol                                  | Results (µg/m³) |      |             |
|--------------|-----------------------------------|-------------|---------------------------|-----------------|-------------|------------------|-----------|-------------------------------------------------------|-----------------|------|-------------|
|              |                                   |             |                           |                 |             |                  |           |                                                       | Min             | Max  | AM ± SD     |
| Acetaldehyde | Istrate et al. 2016 Romania [31]  | Summer 2016 | High school               | 1               | 1           | HVAC             | Yes       | Diffusive passive sampler, 595 hours on continuous    | -               | -    | 1.65        |
| Acrolein     | Becerra et al. 2020 Spain [53]    | Spring 2020 | Elementary Secondary      | 18              | 18          | Window opening   | Yes       | Diffusive passive sampler, collect duration of 5 days | < 0.1           | -    | -           |
| Acrolein     | Villanueva et al. 2018 Spain [61] | Spring 2013 | Kindergarten (Rural)      | 18              | 18          | Window opening   | Yes       | Diffusive passive sampler, 2 weeks son continuous     | 2.5             | 43.7 | 14.5 ± 16.9 |
| Acrolein     | Villanueva et al. 2018 Spain [61] | Spring 2013 | Kindergarten (Urban)      | 18              | 18          | Window opening   | Yes       | Diffusive passive sampler, 2 weeks on continuous      | 6.7             | 9.2  | 7.8 ± 0.9   |
| Acrolein     | Villanueva et al. 2018 Spain [61] | Spring 2013 | Kindergarten (Industrial) | 18              | 18          | Window opening   | Yes       | Diffusive passive sampler, 2 weeks on continuous      | 4.9             | 11.3 | 7.9 ± 2.2   |
| Acrolein     | Villanueva et al. 2018 Spain [61] | Spring 2013 | Elementary (Rural)        | 18              | 18          | Window opening   | Yes       | Diffusive passive sampler, 2 weeks on continuous      | -               | 36   | 10.3 ± 14.6 |
| Acrolein     | Villanueva et al. 2018 Spain [61] | Spring 2013 | Elementary (Urban)        | 18              | 18          | Window opening   | Yes       | Diffusive passive sampler, 2 weeks on continuous      | 5.9             | 16.5 | 10.8 ± 4.2  |
| Acrolein     | Villanueva et al. 2018 Spain [61] | Spring 2013 | Elementary (Industrial)   | 18              | 18          | Window opening   | Yes       | Diffusive passive sampler, 2 weeks on continuous      | 4.8             | 10.3 | 7.9 ± 2.1   |
| Benzaldehyde | Villanueva et al. 2018 Spain [61] | Spring 2020 | Elementary Secondary      | 18              | 18          | Window opening   | Yes       | Diffusive passive sampler, 5 days                     | < 0.1           | 0.7  | N/A         |
| Benzaldehyde | Villanueva et al. 2018 Spain [61] | Spring 2013 | Kindergarten (Rural)      | 18              | 18          | Window opening   | Yes       | Diffusive passive sampler, 2 weeks on continuous      | -               | 4.3  | 1.6 ± 1.6   |
| Benzaldehyde | Villanueva et al. 2018 Spain [61] | Spring 2013 | Kindergarten (Urban)      | 18              | 18          | Window opening   | Yes       | Diffusive passive sampler, 2 weeks on continuous      | 0,1             | 1,2  | 0.5 ± 0.4   |

| Substances     | References location               | Period              | Type of school            | N° of classroom | N° of point | Ventilation type | Occupancy | Measurement protocol                                  | Results (µg/m³) |     |            |
|----------------|-----------------------------------|---------------------|---------------------------|-----------------|-------------|------------------|-----------|-------------------------------------------------------|-----------------|-----|------------|
|                |                                   |                     |                           |                 |             |                  |           |                                                       | Min             | Max | AM ± SD    |
| Benzaldehyde   | Villanueva et al. 2018 Spain [61] | Spring 2013         | Kindergarten (Industrial) | 18              | 18          | Window opening   | Yes       | Diffusive passive sampler, 2 weeks on continuous      | 0,3             | 2,4 | 1.1 ± 1.0  |
| Benzaldehyde   | Villanueva et al. 2018 Spain [61] | Spring 2013         | Elementary (Rural)        | 18              | 18          | Window opening   | Yes       | Diffusive passive sampler, 2 weeks son continuous     | -               | 1,4 | 0.85 ± 0.5 |
| Benzaldehyde   | Villanueva et al. 2018 Spain [61] | Spring 2013         | Elementary (Urban)        | 18              | 18          | Window opening   | Yes       | Diffusive passive sampler, 2 weeks on continuous      | 0,2             | 0,8 | 0.5 ± 0.3  |
| Benzaldehyde   | Villanueva et al. 2018 Spain [61] | Spring 2013         | Elementary (Industrial)   | 18              | 18          | Window opening   | Yes       | Diffusive passive sampler, 2 weeks on continuous      | 0,2             | 1,4 | 0.6 ± 0.4  |
| Butanal        | Becerra et al. 2020 Spain [53]    | Spring 2020         | Elementary Secondary      | 18              | 18          | Window opening   | Yes       | Diffusive passive sampler, collect duration of 5 days | < 0.6           | -   | -          |
| Butyaldehyde   | Canha et al. 2016 France [26]     | January – June 2010 | Nurseries, elementary     | 17              | 37          | Window opening   | Yes       | Diffusive passive sampler, collect duration of 5 days | -               | -   | 13 ± 8     |
| Butyaldehyde   | Canha et al. 2016 France [26]     | January – June 2010 | Nurseries, elementary     | 17              | 14          | HVAC*            | Yes       | Diffusive passive sampler, collect duration of 5 days | -               | -   | 7.6 ± 4.5  |
| Crotonaldehyde | Villanueva et al. 2018 Spain [61] | Spring 2013         | Kindergarten (Rural)      | 18              | 18          | Window opening   | Yes       | Diffusive passive sampler, 2 week on continuous       | -               | -   | -          |
| Crotonaldehyde | Villanueva et al. 2018 Spain [61] | Spring 2013         | Kindergarten (Urban)      | 18              | 18          | Window opening   | Yes       | Diffusive passive sampler, 2 week on continuous       | -               | -   | -          |
| Crotonaldehyde | Villanueva et al. 2018 Spain [61] | Spring 2013         | Kindergarten (Industrial) | 18              | 18          | Window opening   | Yes       | Diffusive passive sampler, 2 week on continuous       | -               | -   | -          |
| Crotonaldehyde | Villanueva et al. 2018 Spain [61] | Spring 2013         | Elementary (Rural)        | 18              | 18          | Window opening   | Yes       | Diffusive passive sampler, 2 week on continuous       | -               | 0,8 | -          |



| Substances     | References location               | Period              | Type of school            | N° of classroom | N° of point | Ventilation type | Occupancy | Measurement protocol                                  | Results (µg/m³) |      |                    |
|----------------|-----------------------------------|---------------------|---------------------------|-----------------|-------------|------------------|-----------|-------------------------------------------------------|-----------------|------|--------------------|
|                |                                   |                     |                           |                 |             |                  |           |                                                       | Min             | Max  | AM ± SD            |
| Crotonaldehyde | Villanueva et al. 2018 Spain [61] | Spring 2013         | Elementary (Urban)        | 18              | 18          | Window opening   | Yes       | Diffusive passive sampler, 2 week on continuous       | -               | 0,3  | -                  |
| Crotonaldehyde | Villanueva et al. 2018 Spain [61] | Spring 2013         | Elementary (Industrial)   | 18              | 18          | Window opening   | Yes       | Diffusive passive sampler, 2 week on continuous       | -               | 0,3  | 0.2 ± 0.04         |
| Hexaldehyde    | Canha et al. 2016 France [26]     | January – June 2010 | Nurseries, elementary     | 17              | 37          | Window opening   | Yes       | Diffusive passive sampler, collect duration of 5 days | -               | -    | 15 ± 11            |
| Hexaldehyde    | Canha et al. 2016 France [26]     | January – June 2010 | Nurseries, elementary     | 17              | 14          | HVAC*            | Yes       | Diffusive passive sampler, collect duration of 5 days | -               | -    | 12 ± 3             |
| Hexanal        | Becerra et al. 2020 Spain [53]    | Spring 2020         | Elementary Secondary      | 18              | 18          | Window opening   | Yes       | Diffusive passive sampler, collect duration of 5 days | -               | -    | Ranges: 6.3 - 15.7 |
| Hexanal        | Villanueva et al. 2018 Spain [61] | Spring 2013         | Kindergarten (Rural)      | 18              | 18          | Window opening   | Yes       | Diffusive passive sampler, 2 week on continuous       | 9,9             | 34,6 | 19.9 ± 8.4         |
| Hexanal        | Villanueva et al. 2018 Spain [61] | Spring 2013         | Kindergarten (Urban)      | 18              | 18          | Window opening   | Yes       | Diffusive passive sampler, 2 week on continuous       | 7,6             | 20,8 | 14.9 ± 5.3         |
| Hexanal        | Villanueva et al. 2018 Spain [61] | Spring 2013         | Kindergarten (Industrial) | 18              | 18          | Window opening   | Yes       | Diffusive passive sampler, 2 week on continuous       | 8,8             | 19,1 | 14.8 ± 3.8         |
| Hexanal        | Villanueva et al. 2018 Spain [61] | Spring 2013         | Elementary (Rural)        | 18              | 18          | Window opening   | Yes       | Diffusive passive sampler, 2 week on continuous       | 9               | 26,9 | 15.8 ± 6.3         |
| Hexanal        | Villanueva et al. 2018 Spain [61] | Spring 2013         | Elementary (Urban)        | 18              | 18          | Window opening   | Yes       | Diffusive passive sampler, 2 week on continuous       | 3,9             | 26,7 | 13.5 ± 8.4         |
| Hexanal        | Villanueva et al. 2018 Spain [61] | Spring 2013         | Elementary (Industrial)   | 18              | 18          | Window opening   | Yes       | Diffusive passive sampler, 2 week on continuous       | 5,8             | 18,5 | 10.8 ± 4.7         |

| Substances  | References location               | Period      | Type of school            | N° of classroom | N° of point | Ventilation type | Occupancy | Measurement protocol                                  | Results (µg/m³) |     |                   |
|-------------|-----------------------------------|-------------|---------------------------|-----------------|-------------|------------------|-----------|-------------------------------------------------------|-----------------|-----|-------------------|
|             |                                   |             |                           |                 |             |                  |           |                                                       | Min             | Max | AM ± SD           |
| Isopentanal | Becerra et al. 2020 Spain [53]    | Spring 2020 | Elementary Secondary      | 18              | 18          | Window opening   | Yes       | Diffusive passive sampler, collect duration of 5 days | -               | -   | Ranges: 0.5 - 1.0 |
| Pentanal    | Becerra et al. 2020 Spain [53]    | Spring 2020 | Elementary Secondary      | 18              | 18          | Window opening   | Yes       | Diffusive passive sampler, collect duration of 5 days | -               | -   | Ranges: 1.5 - 3.0 |
| Pentanal    | Villanueva et al. 2018 Spain [61] | Spring 2013 | Kindergarten (Rural)      | 18              | 18          | Window opening   | Yes       | Diffusive passive sampler, 2 week on continuous       | 1,6             | 4,3 | 3.0 ± 1.1         |
| Pentanal    | Villanueva et al. 2018 Spain [61] | Spring 2013 | Kindergarten (Urban)      | 18              | 18          | Window opening   | Yes       | Diffusive passive sampler, 2 week on continuous       | 0,2             | 1,5 | 0.6 ± 0.5         |
| Pentanal    | Villanueva et al. 2018 Spain [61] | Spring 2013 | Kindergarten (Industrial) | 18              | 18          | Window opening   | Yes       | Diffusive passive sampler, 2 week on continuous       | 0,1             | 3,2 | 1.2 ± 1.1         |
| Pentanal    | Villanueva et al. 2018 Spain [61] | Spring 2013 | Elementary (Rural)        | 18              | 18          | Window opening   | Yes       | Diffusive passive sampler, 2 week on continuous       | 1               | 3,7 | 2.4 ± 1.2         |
| Pentanal    | Villanueva et al. 2018 Spain [61] | Spring 2013 | Elementary (Urban)        | 18              | 18          | Window opening   | Yes       | Diffusive passive sampler, 2 week on continuous       | 1,2             | 1,7 | 1.4 ± 0.3         |
| Pentanal    | Villanueva et al. 2018 Spain [61] | Spring 2013 | Elementary (Industrial)   | 18              | 18          | Window opening   | Yes       | Diffusive passive sampler, 2 week on continuous       | -               | 2,1 | 1.0 ± 0.8         |
| Propanal    | Villanueva et al. 2018 Spain [61] | Spring 2020 | Elementary Secondary      | 18              | 18          | Window opening   | Yes       | Diffusive passive sampler, collect duration of 5 days | -               | -   | Ranges: 1.5 - 2.7 |
| Propanal    | Villanueva et al. 2018 Spain [61] | Spring 2013 | Kindergarten (Rural)      | 18              | 18          | Window opening   | Yes       | Diffusive passive sampler, 2 week on continuous       | 2               | 3   | 2.3 ± 0.4         |
| Propanal    | Villanueva et al. 2018 Spain [61] | Spring 2013 | Kindergarten (Urban)      | 18              | 18          | Window opening   | Yes       | Diffusive passive sampler, 2 week on continuous       | 0,6             | 1,4 | 1.1 ± 0.3         |

| Substances     | References location               | Period      | Type of school            | N° of classroom | N° of point | Ventilation type | Occupancy | Measurement protocol                            | Results (µg/m³) |     |           |
|----------------|-----------------------------------|-------------|---------------------------|-----------------|-------------|------------------|-----------|-------------------------------------------------|-----------------|-----|-----------|
|                |                                   |             |                           |                 |             |                  |           |                                                 | Min             | Max | AM ± SD   |
| Propanal       | Villanueva et al. 2018 Spain [61] | Spring 2013 | Kindergarten (Industrial) | 18              | 18          | Window opening   | Yes       | Diffusive passive sampler, 2 week on continuous | 0,9             | 2,4 | 1.6 ± 0.6 |
| Propanal       | Villanueva et al. 2018 Spain [61] | Spring 2013 | Elementary (Rural)        | 18              | 18          | Window opening   | Yes       | Diffusive passive sampler, 2 week on continuous | 0,2             | 3,2 | 2.3 ± 0.9 |
| Propanal       | Villanueva et al. 2018 Spain [61] | Spring 2013 | Elementary (Urban)        | 18              | 18          | Window opening   | Yes       | Diffusive passive sampler, 2 week on continuous | 0,6             | 1,8 | 1.2 ± 0.6 |
| Propanal       | Villanueva et al. 2018 Spain [61] | Spring 2013 | Elementary (Industrial)   | 18              | 18          | Window opening   | Yes       | Diffusive passive sampler, 2 week on continuous | 1               | 1,8 | 1.4 ± 0.3 |
| p-Tolualdehyde | Villanueva et al. 2018 Spain [61] | Spring 2013 | Elementary (Industrial)   | 18              | 18          | Window opening   | Yes       | Diffusive passive sampler, 2 week on continuous | 0,1             | 0,6 | 0.3 ± 0.1 |
| p-Tolualdehyde | Villanueva et al. 2018 Spain [61] | Spring 2013 | Elementary (Industrial)   | 18              | 18          | Window opening   | Yes       | Diffusive passive sampler, 2 week on continuous | 0,1             | 0,9 | 0.3 ± 0.3 |
| p-Tolualdehyde | Villanueva et al. 2018 Spain [61] | Spring 2013 | Elementary (Industrial)   | 18              | 18          | Window opening   | Yes       | Diffusive passive sampler, 2 week on continuous | 0,2             | 0,9 | 0.5 ± 0.3 |
| p-Tolualdehyde | Villanueva et al. 2018 Spain [61] | Spring 2013 | Elementary (Industrial)   | 18              | 18          | Window opening   | Yes       | Diffusive passive sampler, 2 week on continuous | 0,2             | 1,2 | 0.8 ± 0.3 |
| p-Tolualdehyde | Villanueva et al. 2018 Spain [61] | Spring 2013 | Elementary (Industrial)   | 18              | 18          | Window opening   | Yes       | Diffusive passive sampler, 2 week on continuous | 0,1             | 1,3 | 0.5 ± 0.5 |
| p-Tolualdehyde | Villanueva et al. 2018 Spain [61] | Spring 2013 | Elementary (Industrial)   | 18              | 18          | Window opening   | Yes       | Diffusive passive sampler, 2 week on continuous | -               | 1,8 | 0.6 ± 0.7 |

**1.11 Table S11: Measurements of BTEX in schools across Europe and North America from 2010**

| Compounds      | References location                           | Period (Year) | Type of school           | Number of schools | Number of total samples | Occupancy | Measurement protocol                                            | Concentration ( $\mu\text{g}/\text{m}^3$ ) |     |               |
|----------------|-----------------------------------------------|---------------|--------------------------|-------------------|-------------------------|-----------|-----------------------------------------------------------------|--------------------------------------------|-----|---------------|
|                |                                               |               |                          |                   |                         |           |                                                                 | Min                                        | Max | AM $\pm$ SD   |
| <b>Benzene</b> | Villanueva et al. 2018 Urban, Spain [61]      | 2018          | Elementary               | 6                 | 12                      | Yes       | Passive samplers<br>2 weeks continuously                        | 0.4                                        | 0.5 | $0.5 \pm 0.1$ |
| <b>Benzene</b> | Villanueva et al. 2018 Rural, Spain [61]      | 2018          | Elementary               | 6                 | 12                      | Yes       | Passive samplers<br>2 weeks continuously                        | 0.2                                        | 0.4 | $0.3 \pm 0.1$ |
| <b>Benzene</b> | Villanueva et al. 2018 Industrial, Spain [61] | 2018          | Elementary               | 6                 | 12                      | Yes       | Passive samplers<br>2 weeks continuously                        | 0.6                                        | 0.9 | $0.7 \pm 0.1$ |
| <b>Benzene</b> | Zhong et al. 2017 USA [32]                    | 2017          | Elementary               | 37                | 144                     | Yes       | Tenax passive sampler<br>48h continuously                       | N/A                                        | 4.4 | 0.5           |
| <b>Benzene</b> | Canha et al. 2016 France [26]                 | 2016          | Elementary<br>Nursery    | 17                | 51                      | Yes       | Diffusive samplers<br>5 days continuously<br>(Monday to Friday) | <DL                                        | 8.5 | $2.1 \pm 2.2$ |
| <b>Benzene</b> | Madureira et al. 2016 Portugal [34]           | 2016          | Elementary               | 20                | N/A                     | Yes       | Diffusive samplers<br>5 days continuously<br>(Monday to Friday) | 1.5                                        | 2.7 | 2.2           |
| <b>Benzene</b> | Ramalho et al. 2015 France [58]               | 2009 - 2011   | Kindergarten             | 46                | N/A                     | Yes       | Diffusive samplers<br>5 days continuously<br>(Monday to Friday) | 0.7                                        | 6.5 | $2.5 \pm 1.0$ |
| <b>Benzene</b> | Ramalho et al. 2015 France [58]               | 20            | Elementary               | 53                | N/A                     | Yes       | Diffusive samplers<br>5 days continuously<br>(Monday to Friday) | 0.2                                        | 22  | $2.5 \pm 1.4$ |
| <b>Benzene</b> | Csobod et al. 2014 Europe [35]                | 2014          | Nurseries,<br>elementary | 114               | N/A                     | Yes       | Diffusive samplers<br>5 days continuously<br>(Monday to Friday) | <DL                                        | 38  | 4             |
| <b>Benzene</b> | Gennaro et al. 2013 Italy [62]                | 2013          | Elementary<br>Secondary  | 8                 | 8                       | Yes       | Diffusive samplers<br>5 days continuously<br>(Monday to Friday) | 0.1                                        | 0.5 | $0.3 \pm 0.2$ |
| <b>Benzene</b> | Papadopoulos et al. 2020 Greece [5]           | 2020          | University               | 1                 | 1                       | Yes       | Active air sampling<br>80ml/min<br>30 minutes                   | N/A                                        | N/A | 8             |

| Compounds      | References location                           | Period (Year) | Type of school          | Number of schools | Number of total samples | Occupancy | Measurement protocol                                             | Concentration ( $\mu\text{g}/\text{m}^3$ ) |     |               |
|----------------|-----------------------------------------------|---------------|-------------------------|-------------------|-------------------------|-----------|------------------------------------------------------------------|--------------------------------------------|-----|---------------|
|                |                                               |               |                         |                   |                         |           |                                                                  | Min                                        | Max | AM $\pm$ SD   |
| <b>Benzene</b> | Papadopoulos et al. 2020 Greece [5]           | 2020          | University              | 1                 | 1                       | Yes       | Active air sampling<br>80ml/min<br>30 minutes                    | N/A                                        | N/A | 17            |
| <b>Benzene</b> | Becerra et al. 2020 Spain [53]                | 2020          | Elementary              | 4                 | 8                       | Yes       | Diffusive samplers<br>5 days continuously<br>(Monday to Friday)  | 1.1                                        | 1.5 | $1.3 \pm 0.1$ |
| <b>Benzene</b> | Becerra et al. 2020 Spain [53]                | 2020          | Secondary High school   | 4                 | 8                       | Yes       | Diffusive samplers<br>5 days continuously<br>(Monday to Friday)  | 1.1                                        | 1.8 | $1.4 \pm 0.2$ |
| <b>Benzene</b> | Senitkova et al., Czech Republic [28]         | 2017          | Nursery                 | 3                 | 6                       | Yes       | Photoionization detector with UV lamp<br>30 minutes continuously | 1.6                                        | 3.7 | $2.7 \pm 0.7$ |
| <b>Benzene</b> | Sivanantham et al. 2021 France [54]           | 2013- 2017    | Kindergarten Elementary | 296               | 66044*                  | Yes       | Passive sampler<br>Monday to Friday                              | N/A                                        | N/A | $1.4 \pm 0.1$ |
| <b>Toluene</b> | Villanueva et al. 2018 Urban, Spain [61]      | 2018          | Elementary              | 6                 | 12                      | Yes       | Passive samplers<br>2 weeks continuously                         | 1.4                                        | 4.3 | $2.2 \pm 1.1$ |
| <b>Toluene</b> | Villanueva et al. 2018 Rural, Spain [61]      | 2018          | Elementary              | 6                 | 12                      | Yes       | Passive samplers<br>2 weeks continuously                         | 1.1                                        | 10  | $3.4 \pm 3.5$ |
| <b>Toluene</b> | Villanueva et al. 2018 Industrial, Spain [61] | 2018          | Elementary              | 6                 | 12                      | Yes       | Passive samplers<br>2 weeks continuously                         | 1.1                                        | 31  | $7.9 \pm 12$  |
| <b>Toluene</b> | Zhong et al. 2017 USA [32]                    | 2017          | Elementary              | 37                | 144                     | Yes       | Tenax passive sampler<br>48h continuously                        | N/A                                        | 2   | 0.2           |
| <b>Toluene</b> | Canha et al. 2016 France [26]                 | 2016          | Elementary Nursery      | 17                | 51                      | Yes       | Diffusive samplers<br>5 days continuously<br>(Monday to Friday)  | 1.7                                        | 24  | $5.2 \pm 5.1$ |
| <b>Toluene</b> | Madureira et al. 2016 Portugal [34]           | 2016          | Elementary              | 20                | N/A                     | Yes       | Diffusive samplers<br>5 days continuously<br>(Monday to Friday)  | 1.8                                        | 202 | 15            |
| <b>Toluene</b> | Gennaro et al. 2013 Italy [62]                | 2013          | Elementary Secondary    | 8                 | 8                       | Yes       | Diffusive samplers<br>5 days continuously<br>(Monday to Friday)  | 0.7                                        | 6.8 | $2.2 \pm 1.7$ |

| Compounds           | References location                           | Period (Year) | Type of school             | Number of schools | Number of total samples | Occupancy | Measurement protocol                                             | Concentration ( $\mu\text{g}/\text{m}^3$ ) |     |               |
|---------------------|-----------------------------------------------|---------------|----------------------------|-------------------|-------------------------|-----------|------------------------------------------------------------------|--------------------------------------------|-----|---------------|
|                     |                                               |               |                            |                   |                         |           |                                                                  | Min                                        | Max | AM $\pm$ SD   |
| <b>Toluene</b>      | Papadopoulos et al. 2020 Greece [5]           | 2020          | University                 | 1                 | 1                       | Yes       | Active air sampling<br>80ml/min<br>30 minutes                    | N/A                                        | N/A | 11            |
| <b>Toluene</b>      | Papadopoulos et al. 2020 Greece [5]           | 2020          | University                 | 1                 | 1                       | Yes       | Active air sampling<br>80ml/min<br>30 minutes                    | N/A                                        | N/A | 17            |
| <b>Toluene</b>      | Becerra et al. 2020 Spain [53]                | 2020          | Elementary                 | 4                 | 8                       | Yes       | Diffusive samplers<br>5 days continuously<br>(Monday to Friday)  | 3.4                                        | 20  | $8.6 \pm 5.8$ |
| <b>Toluene</b>      | Becerra et al. 2020 Spain [53]                | 2020          | Secondary High school      | 4                 | 8                       | Yes       | Diffusive samplers<br>5 days continuously<br>(Monday to Friday)  | 3.0                                        | 9.2 | $5.2 \pm 2.2$ |
| <b>Toluene</b>      | Senitkova et al. 2018 Czech Republic [28]     | 2017          | Nursery                    | 3                 | 6                       | Yes       | Photoionization detector with UV lamp<br>30 minutes continuously | 1.1                                        | 4.6 | $2.8 \pm 1.3$ |
| <b>Toluene</b>      | Sivanantham et al. 2021 France [54]           | 2013- 2017    | Kindergarten<br>Elementary | 296               | 66044*                  | Yes       | Passive sampler<br>Monday to Friday                              | N/A                                        | N/A | $7.0 \pm 1.3$ |
| <b>Ethylbenzene</b> | Villanueva et al. 2018 Urban, Spain [61]      | 2018          | Elementary                 | 6                 | 12                      | Yes       | Passive samplers<br>2 weeks continuously                         | <DL                                        | 2.2 | $0.6 \pm 0.8$ |
| <b>Ethylbenzene</b> | Villanueva et al. 2018 Rural, Spain [61]      | 2018          | Elementary                 | 6                 | 12                      | Yes       | Passive samplers<br>2 weeks continuously                         | 0.2                                        | 2.1 | $1 \pm 0.9$   |
| <b>Ethylbenzene</b> | Villanueva et al. 2018 Industrial, Spain [61] | 2018          | Elementary                 | 6                 | 12                      | Yes       | Passive samplers<br>2 weeks continuously                         | 0.3                                        | 2.2 | $0.8 \pm 0.5$ |
| <b>Ethylbenzene</b> | Zhong et al. 2017 USA [32]                    | 2017          | Elementary                 | 37                | 144                     | Yes       | Tenax passive sampler<br>48h continuously                        | N/A                                        | 2   | 0.2           |
| <b>Ethylbenzene</b> | Canha et al. 2016 France [26]                 | 2016          | Elementary<br>Nursery      | 17                | 51                      | Yes       | Diffusive samplers<br>5 days continuously<br>(Monday to Friday)  | 1.2                                        | 6   | $2.2 \pm 1.3$ |
| <b>Ethylbenzene</b> | Gennaro et al. 2013 Italy [62]                | 2013          | Elementary<br>Secondary    | 8                 | 8                       | Yes       | Diffusive samplers<br>5 days continuously<br>(Monday to Friday)  | 0.1                                        | 2.3 | $0.6 \pm 0.5$ |
| <b>Ethylbenzene</b> | Papadopoulos et al. 2020 Greece [5]           | 2020          | University                 | 1                 | 1                       | Yes       | Active air sampling<br>80ml/min                                  | N/A                                        | N/A | 1             |

| Compounds           | References location                           | Period (Year) | Type of school             | Number of schools | Number of total samples | Occupancy | Measurement protocol                                             | Concentration ( $\mu\text{g}/\text{m}^3$ ) |      |               |
|---------------------|-----------------------------------------------|---------------|----------------------------|-------------------|-------------------------|-----------|------------------------------------------------------------------|--------------------------------------------|------|---------------|
|                     |                                               |               |                            |                   |                         |           |                                                                  | Min                                        | Max  | AM $\pm$ SD   |
|                     |                                               |               |                            |                   |                         |           | 30 minutes                                                       |                                            |      |               |
| <b>Ethylbenzene</b> | Papadopoulos et al. 2020Greece [5]            | 2020          | University                 | 1                 | 1                       | Yes       | Active air sampling<br>80ml/min<br>30 minutes                    | N/A                                        | N/A  | 6             |
| <b>Ethylbenzene</b> | Becerra et al. 2020 Spain [53]                | 2020          | Elementary                 | 4                 | 8                       | Yes       | Diffusive samplers<br>5 days continuously<br>(Monday to Friday)  | 0.3                                        | 0.9  | $0.5 \pm 0.2$ |
| <b>Ethylbenzene</b> | Becerra et al. 2020 Spain [53]                | 2020          | Secondary High school      | 4                 | 8                       | Yes       | Diffusive samplers<br>5 days continuously<br>(Monday to Friday)  | 0.5                                        | 0.9  | $0,7 \pm 0,2$ |
| <b>Ethylbenzene</b> | Senitkova et al. 2018 Czech Republic [28]     | 2017          | Nursery                    | 3                 | 6                       | Yes       | Photoionization detector with UV lamp<br>30 minutes continuously | 0.5                                        | 9.0  | $5.0 \pm 3.3$ |
| <b>Ethylbenzene</b> | Sivanantham et al. 2021 France [54]           | 2013- 2017    | Kindergarten<br>Elementary | 296               | 66044*                  | Yes       | Passive sampler<br>Monday to Friday                              | N/A                                        | N/A  | $1.3 \pm 0.1$ |
| <b>m,p-xylenes</b>  | Senitkova et al. 2018 Czech Republic [28]     | 2017          | Nursery                    | 3                 | 6                       | Yes       | Photoionization detector with UV lamp<br>30 minutes continuously | 0.6                                        | 2.5  | $1.6 \pm 0.7$ |
| <b>m,p-xylenes</b>  | Villanueva et al. 2018 Urban, Spain [61]      | 2018          | Elementary                 | 6                 | 12                      | Yes       | Passive samplers<br>2 weeks continuously                         | 0.6                                        | 2.1  | $1.3 \pm 0.6$ |
| <b>m,p-xylenes</b>  | Villanueva et al. 2018 Rural, Spain [61]      | 2018          | Elementary                 | 6                 | 12                      | Yes       | Passive samplers<br>2 weeks continuously                         | 0.7                                        | 4.1  | $2.1 \pm 1.4$ |
| <b>m,p-xylenes</b>  | Villanueva et al. 2018 Industrial, Spain [61] | 2018          | Elementary                 | 6                 | 12                      | Yes       | Passive samplers<br>2 weeks continuously                         | 0.9                                        | 0.6  | $0.3 \pm 0.1$ |
| <b>m,p-xylenes</b>  | Zhong et al. 2017 USA [32]                    | 2017          | Elementary                 | 37                | 144                     | Yes       | Tenax passive sampler<br>48h continuously                        | N/A                                        | 7.4  | 0.9           |
| <b>m,p-xylenes</b>  | Canha et al. 2016 France [26]                 | 2016          | Elementary<br>Nursery      | 17                | 51                      | Yes       | Diffusive samplers<br>5 days continuously<br>(Monday to Friday)  | 1.6                                        | 14.9 | $4.4 \pm 3.5$ |
| <b>m,p-xylenes</b>  | Madureira et al. 2016 Portugal [34]           | 2016          | Elementary                 | 20                | N/A                     | Yes       | Diffusive samplers<br>5 days continuously<br>(Monday to Friday)  | 1.2                                        | 365  | 17.7          |

| Compounds          | References location                 | Period (Year) | Type of school             | Number of schools | Number of total samples | Occupancy | Measurement protocol                                            | Concentration ( $\mu\text{g}/\text{m}^3$ ) |      |               |
|--------------------|-------------------------------------|---------------|----------------------------|-------------------|-------------------------|-----------|-----------------------------------------------------------------|--------------------------------------------|------|---------------|
|                    |                                     |               |                            |                   |                         |           |                                                                 | Min                                        | Max  | AM $\pm$ SD   |
| <b>m,p-xylenes</b> | Gennaro et al. 2013 Italy [62]      | 2013          | Elementary, Secondary      | 8                 | 8                       | Yes       | Diffusive samplers<br>5 days continuously<br>(Monday to Friday) | 0.2                                        | 21   | $2.7 \pm 4.9$ |
| <b>m,p-xylenes</b> | Papadopoulos et al. 2020 Greece [5] | 2020          | University                 | 1                 | 1                       | Yes       | Active air sampling<br>80ml/min<br>30 minutes                   | N/A                                        | N/A  | 1             |
| <b>m,p-xylenes</b> | Papadopoulos et al. 2020 Greece [5] | 2020          | University                 | 1                 | 1                       | Yes       | Active air sampling<br>80ml/min<br>30 minutes                   | N/A                                        | N/A  | 6             |
| <b>m,p-xylenes</b> | Becerra et al. 2020 Spain [53]      | 2020          | Secondary High school      | 4                 | 8                       | Yes       | Diffusive samplers<br>5 days continuously<br>(Monday to Friday) | 0.8                                        | 9.0  | $2.2 \pm 2.4$ |
| <b>m,p-xylenes</b> | Becerra et al. 2020 Spain [53]      | 2020          | Secondary High school      | 4                 | 8                       | Yes       | Diffusive samplers<br>5 days continuously<br>(Monday to Friday) | 1.5                                        | 3.8  | $2.2 \pm 0.8$ |
| <b>m,p-xylenes</b> | Sivanantham et al. 2021 France [54] | 2013- 2017    | Kindergarten<br>Elementary | 296               | 66044*                  | Yes       | Passive sampler<br>Monday to Friday                             | N/A                                        | N/A  | $3.5 \pm 0.4$ |
| <b>o xylene</b>    | Madureira et al. 2016 Portugal [34] | 2016          | Elementary<br>Secondary    | 20                | N/A                     | Yes       | Diffusive samplers<br>5 days continuously<br>(Monday to Friday) | 1.1                                        | 52.4 | 3.9           |
| <b>o xylene</b>    | Zhong et al. 2017 USA [32]          | 2017          | Elementary                 | 37                | 144                     | Yes       | Tenax passive sampler<br>48h continuously                       | N/A                                        | 2.2  | 0.3           |
| <b>o-xylene</b>    | Papadopoulos et al. 2020 Greece [5] | 2020          | University                 | 1                 | 1                       | Yes       | Active air sampling<br>80ml/min<br>30 minutes                   | N/A                                        | N/A  | 0.5           |
| <b>o-xylene</b>    | Papadopoulos et al. 2020 Greece [5] | 2020          | University                 | 1                 | 1                       | Yes       | Active air sampling<br>80ml/min<br>30 minutes                   | N/A                                        | N/A  | 2             |
| <b>o-xylene</b>    | Becerra et al. 2020 Spain [53]      | 2020          | Elementary                 | 4                 | 8                       | Yes       | Diffusive samplers<br>5 days continuously<br>(Monday to Friday) | 0.6                                        | 2.2  | $0.8 \pm 0.5$ |
| <b>o-xylene</b>    | Becerra et al. 2020 Spain [53]      | 2020          | Secondary High school      | 4                 | 8                       | Yes       | Diffusive samplers<br>5 days continuously<br>(Monday to Friday) | 0.5                                        | 1.8  | $0.9 \pm 0.5$ |



| Compounds       | References location                       | Period (Year) | Type of school          | Number of schools | Number of total samples | Occupancy | Measurement protocol                                             | Concentration ( $\mu\text{g}/\text{m}^3$ ) |      |               |
|-----------------|-------------------------------------------|---------------|-------------------------|-------------------|-------------------------|-----------|------------------------------------------------------------------|--------------------------------------------|------|---------------|
|                 |                                           |               |                         |                   |                         |           |                                                                  | Min                                        | Max  | AM $\pm$ SD   |
| <b>o-xylene</b> | Senitkova et al. 2018 Czech Republic [28] | 2017          | Nursery                 | 3                 | 6                       | Yes       | Photoionization detector with UV lamp<br>30 minutes continuously | 0.6                                        | 11.6 | $7.1 \pm 4.7$ |
| <b>o-xylene</b> | Sivanantham et al. 2021 France [54]       | 2013- 2017    | Kindergarten Elementary | 296               | 66044*                  | Yes       | Passive sampler<br>Monday to Friday                              | N/A                                        | N/A  | $1.6 \pm 0.2$ |

DL: detection limit; HVAC: Heat, ventilation and air conditioning; AM: arithmetic mean; SD: standard deviation

**1.12 Table S12: Measurements of volatile organic compounds in schools across Europe and North America from 2010**

| Substances                    | References Location                       | Period        | Type of schools      | Number of buildings | Number of points | Type of ventilation | Measurement protocol                                              | Concentration ( $\mu\text{g}/\text{m}^3$ ) |                        |                |
|-------------------------------|-------------------------------------------|---------------|----------------------|---------------------|------------------|---------------------|-------------------------------------------------------------------|--------------------------------------------|------------------------|----------------|
|                               |                                           |               |                      |                     |                  |                     |                                                                   | Min                                        | Max                    | AM $\pm$ SD    |
| <b>1,2,3-trimethylbenzene</b> | Papadopoulos et al. 2020 Greece [5]       | December 2019 | University           | 1                   | 1                | Window opening      | 30 minutes<br>Active air sampling<br>80ml/min                     | N/A                                        | N/A                    | <DL            |
| <b>1,2,3-trimethylbenzene</b> | Papadopoulos et al. 2020 Greece [5]       | December 2019 | University           | 1                   | 1                | Window opening      | 30 minutes<br>Active air sampling<br>80ml/min                     | N/A                                        | N/A                    | 1              |
| <b>1,2,4-trimethylbenzene</b> | Papadopoulos et al. 2020 Greece [5]       | December 2019 | University           | 1                   | 10               | Window opening      | 30 minutes<br>Active air sampling<br>80ml/min                     | N/A                                        | N/A                    | <DL            |
| <b>1,2,4-trimethylbenzene</b> | Papadopoulos et al. 2020 Greece [5]       | December 2019 | University           | 1                   | 10               | Window opening      | 30 minutes<br>Active air sampling<br>80ml/min                     | N/A                                        | N/A                    | 0.5            |
| <b>1,4-dichlorobenzene</b>    | Becerra et al. 2020 Spain [53]            | Spring 2020   | Elementary Secondary | 18                  | 18               | Window opening      | 5 days on continuous,<br>Diffusive sampling                       | N/A                                        | N/A                    | Ranges:<br><LD |
| <b>1,4-dichlorobenzene</b>    | Becerra et al. 2020 Spain [53]            | Spring 2020   | Elementary Secondary | 18                  | 18               | Window opening      | 5 days on continuous,<br>Diffusive sampling                       | N/A                                        | N/A                    | Ranges:<br><LD |
| <b>1-butanol</b>              | Senitkova et al. 2017 Czech Republic [28] | 2017          | Nursery              | 3                   | 6                | Window opening      | 30 minutes on continuous<br>Photoionization detector with UV lamp | N/A                                        | Ranges:<br>0.47 - 9.93 | N/A            |

| Substances            | References Location                          | Period                          | Type of schools         | Number of buildings | Number of points | Type of ventilation | Measurement protocol                                              | Concentration ( $\mu\text{g}/\text{m}^3$ ) |                      |               |
|-----------------------|----------------------------------------------|---------------------------------|-------------------------|---------------------|------------------|---------------------|-------------------------------------------------------------------|--------------------------------------------|----------------------|---------------|
|                       |                                              |                                 |                         |                     |                  |                     |                                                                   | Min                                        | Max                  | AM $\pm$ SD   |
| <b>1-butylacetate</b> | Senitkova et al. 2017<br>Czech Republic [28] | 2017                            | Nursery                 | 3                   | 6                | Window opening      | 30 minutes on continuous Photoionization detector with UV lamp    | N/A                                        | Ranges: 0.69 - 11.26 | N/A           |
| <b>1-butylacetate</b> | Senitkova 2017<br>Czech Republic [28]        | 2017                            | Nursery                 | 3                   | 6                | Window opening      | 30 minutes on continuous Photoionization detector with UV lamp    | N/A                                        | Ranges: 0.58 - 11.88 | N/A           |
| <b>Decane</b>         | Villanueva et al. 2018 Spain [61]            | Spring 2013                     | Elementary (Urban)      | 18                  | 18               | Window opening      | 2 weeks on continuous, Passive samplers                           | 0.4                                        | 1.1                  | $0.8 \pm 0.3$ |
| <b>Decane</b>         | Villanueva et al. 2018 Spain [61]            | Spring 2013                     | Elementary (Rural)      | 18                  | 18               | Window opening      | 2 weeks on continuous, passive samplers                           | 0.4                                        | 1.1                  | $0.8 \pm 0.3$ |
| <b>Decane</b>         | Villanueva et al. 2018 Spain [61]            | Spring 2013                     | Elementary (Industrial) | 18                  | 18               | Window opening      | 2 weeks on continuous, passive samplers                           | 0.3                                        | 8.6                  | $1.8 \pm 3.3$ |
| <b>Decane</b>         | Madureira et al. 2015 Portugal [34]          | November to March, 2011 to 2013 | Elementary              | 20                  | 73               | Window opening      | 5 days on continuous (Monday to Friday) Diffusive passive sampler | 1.1                                        | 52.4                 | 3.9           |
| <b>Decane</b>         | Gennaro et al., 2013 Italy [62]              | 2013                            | Elementary Secondary    | 1                   | 3                | Window opening      | 5 days on continuous (Monday to Friday) Diffusive passive sampler | 0.4                                        | 2.9                  | N/A           |
| <b>d-limonene</b>     | Papadopoulos et al. 2020 Greece [5]          | December 2019                   | University              | 1                   | 1                | Window opening      | 30 minutes Active air sampling 80ml/min                           | NA                                         | NA                   | 1             |
| <b>d-limonene</b>     | Papadopoulos et al. 2020 Greece [5]          | December 2019                   | University              | 1                   | 1                | Window opening      | 30 minutes Active air sampling 80ml/min                           | NA                                         | NA                   | 10            |
| <b>Ethylacetate</b>   | Senitkova et al. 2017<br>Czech Republic [28] | 2017                            | Nursery                 | 3                   | 6                | Window opening      | 30 minutes on continuous Photoionization detector with UV lamp    | N/A                                        | Ranges: 0.21 - 4.27  | N/A           |
| <b>Ethylacetate</b>   | Senitkova et al. 2017<br>Czech Republic      | 2017                            | Nursery                 | 3                   | 6                | Window opening      | 30 minutes on continuous Photoionization detector with UV lamp    | N/A                                        | Ranges: 0.33 - 5.43  | N/A           |

| Substances      | References Location                 | Period                     | Type of schools           | Number of buildings | Number of points | Type of ventilation | Measurement protocol                    | Concentration ( $\mu\text{g}/\text{m}^3$ ) |       |                 |
|-----------------|-------------------------------------|----------------------------|---------------------------|---------------------|------------------|---------------------|-----------------------------------------|--------------------------------------------|-------|-----------------|
|                 |                                     |                            |                           |                     |                  |                     |                                         | Min                                        | Max   | AM $\pm$ SD     |
|                 | [28]                                |                            |                           |                     |                  |                     |                                         |                                            |       |                 |
| <b>Hexane</b>   | Villanueva et al. 2018 Spain [61]   | Spring 2013                | Elementary (Urban)        | 18                  | 18               | Window opening      | 2 weeks on continuous, Passive samplers | 0.7                                        | 4.9   | NA              |
| <b>Hexane</b>   | Villanueva et al. 2018 Spain [61]   | Spring 2013                | Elementary (Rural)        | 18                  | 18               | Window opening      | 2 weeks on continuous, Passive samplers | <DL                                        | 3.7   | 1.1 $\pm$ 1.5   |
| <b>Hexane</b>   | Villanueva et al. 2018 Spain [61]   | Spring 2013                | Elementary (Industrial)   | 18                  | 18               | Window opening      | 2 weeks on continuous, Passive samplers | <DL                                        | <DL   | NA              |
| <b>Hexane</b>   | Zhong et al. 2016 USA [32]          | October 2015 to March 2016 | Elementary and K8 schools | 37                  | 144              | HVAC                | 48h on continuous Tenax passive sampler | NA                                         | 27.2  | 3.2             |
| <b>Hexane</b>   | Papadopoulos et al. 2020 Greece [5] | December 2019              | University                | 1                   | 1                | Window opening      | 30 minutes Active air sampling 80ml/min | NA                                         | NA    | 67              |
| <b>Hexane</b>   | Papadopoulos et al. 2020 Greece [5] | December 2019              | University                | 1                   | 1                | Window opening      | 30 minutes Active air sampling 80ml/min | NA                                         | NA    | 8               |
| <b>Limonene</b> | Villanueva et al. 2018 Spain [61]   | Spring 2013                | Elementary (Urban)        | 18                  | 18               | Window opening      | 48h on continuous Tenax passive sampler | 6.3                                        | 25.7  | 18.9 $\pm$ 8    |
| <b>Limonene</b> | Villanueva et al. 2018 Spain [61]   | Spring 2013                | Elementary (Rural)        | 18                  | 18               | Window opening      | 48h on continuous Tenax passive sampler | 6.2                                        | 37    | 14.3 $\pm$ 8    |
| <b>Limonene</b> | Villanueva et al. 2018 Spain [61]   | Spring 2013                | Elementary (Industrial)   | 18                  | 18               | Window opening      | 48h on continuous Tenax passive sampler | 1.1                                        | 33.7  | 33.2 $\pm$ 36.5 |
| <b>Limonene</b> | Zhong et al. 2016 USA [32]          | October 2015 to March 2016 | Elementary and K8 schools | 37                  | 144              | HVAC                | 48h on continuous Tenax passive sampler | N/A                                        | 158.5 | 11.3            |

| Substances           | References Location                       | Period                          | Type of schools           | Number of buildings | Number of points | Type of ventilation | Measurement protocol                                                 | Concentration ( $\mu\text{g}/\text{m}^3$ ) |                     |             |
|----------------------|-------------------------------------------|---------------------------------|---------------------------|---------------------|------------------|---------------------|----------------------------------------------------------------------|--------------------------------------------|---------------------|-------------|
|                      |                                           |                                 |                           |                     |                  |                     |                                                                      | Min                                        | Max                 | AM $\pm$ SD |
| <b>Limonene</b>      | Madureira et al. 2015 Portugal [34]       | November to March, 2011 to 2013 | Elementary                | 20                  | 73               | Window opening      | 5 days on continuous (Monday to Friday)<br>Diffusive passive sampler | 2.8                                        | 215.3               | 38.1        |
| <b>Limonene</b>      | Csobod et al. Europe [35]                 | 2011 - 2012                     | Elementary Nursery        | 114                 | <LD              | Mixed               | 5 days on continuous (Monday to Friday)<br>Diffusive passive sampler | N/A                                        | 671                 | N/A         |
| <b>Methylacetate</b> | Senitkova et al. 2017 Czech Republic [28] | 2017                            | Nursery                   | 3                   | 6                | Window opening      | 30 minutes on continuous<br>Photoionization detector with UV lamp    | N/A                                        | Ranges: 0.82 - 7.44 | N/A         |
| <b>Methylacetate</b> | Senitkova et al. 2017 Czech Republic [28] | 2017                            | Nursery                   | 3                   | 6                | Window opening      | 30 minutes on continuous<br>Photoionization detector with UV lamp    | N/A                                        | Ranges: 0.73 - 7.16 | N/A         |
| <b>MIBK</b>          | Zhong et al. 2016 USA [32]                | October 2015 to March 2016      | Elementary and K8 schools | 37                  | 144              | HVAC                | 48h on continuous<br>Tenax passive sampler                           | N/A                                        | 4.3                 | 0.2         |
| <b>Naphtalene</b>    | Papadopoulos et al. 2020 Greece [5]       | December 2019                   | University                | 1                   | 1                | Window opening      | 30 minutes<br>Active air sampling<br>80ml/min                        | N/A                                        | N/A                 | <DL         |
| <b>Naphtalene</b>    | Papadopoulos et al. 2020 Greece [5]       | December 2019                   | University                | 1                   | 1                | Window opening      | 30 minutes<br>Active air sampling<br>80ml/min                        | N/A                                        | N/A                 | 0.5         |
| <b>Naphtalene</b>    | Senitkova et al. 2017 Czech Republic [28] | 2017                            | Nursery                   | 3                   | 6                | Window opening      | 30 minutes on continuous<br>Photoionization detector with UV lamp    | N/A                                        | Ranges: 1.15 - 2.07 | N/A         |
| <b>Naphtalene</b>    | Senitkova et al. 2017 Czech Republic [28] | 2017                            | Nursery                   | 3                   | 6                | Window opening      | 30 minutes on continuous<br>Photoionization detector with UV lamp    | N/A                                        | Ranges: 0.57 - 2.17 | N/A         |

| Substances               | References<br>Location                       | Period              | Type of<br>schools    | Number<br>of<br>buildings | Number<br>of points | Type of<br>ventilation | Measurement protocol                                                  | Concentration ( $\mu\text{g}/\text{m}^3$ ) |      |                     |
|--------------------------|----------------------------------------------|---------------------|-----------------------|---------------------------|---------------------|------------------------|-----------------------------------------------------------------------|--------------------------------------------|------|---------------------|
|                          |                                              |                     |                       |                           |                     |                        |                                                                       | Min                                        | Max  | AM $\pm$ SD         |
| <b>n-butylbenzene</b>    | Senitkova et al. 2017<br>Czech Republic [28] | 2017                | Nursery               | 3                         | 6                   | Window opening         | 30 minutes on continuous Photoionization detector with UV lamp        | N/A                                        | N/A  | Ranges: 0.60 - 2.73 |
| <b>n-butylbenzene</b>    | Senitkova et al. 2017<br>Czech Republic [28] | 2017                | Nursery               | 3                         | 6                   | Window opening         | 30 minutes on continuous Photoionization detector with UV lamp        | N/A                                        | N/A  | Ranges: 0.53 - 2.11 |
| <b>Octane</b>            | Papadopoulos et al. 2020<br>Greece [5]       | December 2019       | University            | 1                         | 1                   | Window opening         | 30 minutes<br>Active air sampling<br>80ml/min                         | NA                                         | NA   | 1                   |
| <b>Octane</b>            | Papadopoulos et al. 2020<br>Greece [5]       | December 2019       | University            | 1                         | 1                   | Window opening         | 30 minutes<br>Active air sampling<br>80ml/min                         | N/A                                        | N/A  | 1                   |
| <b>Perchloroethylene</b> | Canha et al. France [26]                     | January – June 2010 | Nurseries, elementary | 17                        | 37                  | Mixed                  | 5 days on continuous (Monday to Friday)<br>Diffusive passive sampler) | <DL                                        | 11.5 | <DL                 |
| <b>Perchloroethylene</b> | Papadopoulos et al. 2020<br>Greece [5]       | December 2019       | University            | 1                         | 1                   | Window opening         | 30 minutes<br>Active air sampling<br>80ml/min                         | N/A                                        | N/A  | < LD                |
| <b>Perchloroethylene</b> | Papadopoulos et al. 2020<br>Greece [5]       | December 2019       | University            | 1                         | 1                   | Window opening         | 30 minutes<br>Active air sampling<br>80ml/min                         | N/A                                        | N/A  | < LD                |
| <b>Perchloroethylene</b> | Becerra et al, 2020<br>Spain [53]            | 2017                | Elementary            | 4                         | 2                   |                        | 5 days on continuous, Diffusive sampling                              | <DL                                        | 0.8  | N/A                 |
| <b>Perchloroethylene</b> | Becerra et al, 2020<br>Spain [53]            | 2017                | Secondary High school | 4                         | 2                   |                        | 5 days on continuous, Diffusive sampling                              | >DL                                        | 0.8  | N/A                 |
| <b>Styrene</b>           | Villanueva et al. 2018<br>Spain [61]         | Spring 2013         | Elementary (Urban)    | 18                        | 18                  | Window opening         | 2 weeks on continuous<br>Passive samplers                             | -                                          | 2    | 0.9 $\pm$ 0.8       |

| Substances        | References Location                       | Period              | Type of schools         | Number of buildings | Number of points | Type of ventilation | Measurement protocol                                              | Concentration ( $\mu\text{g}/\text{m}^3$ ) |     |                     |
|-------------------|-------------------------------------------|---------------------|-------------------------|---------------------|------------------|---------------------|-------------------------------------------------------------------|--------------------------------------------|-----|---------------------|
|                   |                                           |                     |                         |                     |                  |                     |                                                                   | Min                                        | Max | AM $\pm$ SD         |
| Styrene           | Villanueva et al. 2018 Spain [61]         | Spring 2013         | Elementary (Rural)      | 18                  | 18               | Window opening      | 2 weeks on continuous Passive samplers                            | N/A                                        | 1.5 | $0.4 \pm 0.6$       |
| Styrene           | Villanueva et al. 2018 Spain [61]         | Spring 2013         | Elementary (Industrial) | 18                  | 18               | Window opening      | 2 weeks on continuous Passive samplers                            | N/A                                        | 8   | $2.1 \pm 3.9$       |
| Styrene           | Canha et al. France [26]                  | January – June 2010 | Nurseries, elementary   | 17                  | 37               | Mixed               | 5 days on continuous (Monday to Friday) Diffusive passive sampler | 0.9                                        | 4   | $1.1 \pm 1.3$       |
| Styrene           | Papadopoulos et al. 2020 Greece [5]       | December 2019       | University              | 1                   | 1                | Window opening      | 30 minutes Active air sampling 80ml/min                           | N/A                                        | N/A | 2                   |
| Styrene           | Papadopoulos et al. 2020 Greece [5]       | December 2019       | University              | 1                   | 1                | Window opening      | 30 minutes Active air sampling 80ml/min                           | N/A                                        | N/A | 1                   |
| Styrene           | Becerra et al. 2020 Spain [53]            | Spring 2020         | Elementary Secondary    | 18                  | 18               | Window opening      | 5 days on continuous, Diffusive sampling                          | N/A                                        | N/A | Ranges: 0.6 - 1.45  |
| Styrene           | Becerra et al. 2020 Spain [53]            | Spring 2020         | Elementary Secondary    | 18                  | 18               | Window opening      | 5 days on continuous, Diffusive sampling                          | N/A                                        | N/A | Ranges: 0.8 - 2.45  |
| Styrene           | Senitkova et al. 2017 Czech Republic [28] | 2017                | Nursery                 | 3                   | 6                | Window opening      | 30 minutes on continuous Photoionization detector with UV lamp    | N/A                                        | N/A | Ranges: 0.97 - 5.14 |
| Styrene           | Senitkova et al. 2017 Czech Republic [28] | 2017                | Nursery                 | 3                   | 6                | Window opening      | 30 minutes on continuous Photoionization detector with UV lamp    | N/A                                        | N/A | Ranges: 0.87 - 5.19 |
| Trichloroethylene | Papadopoulos et al. 2020 Greece [5]       | December 2019       | University              | 1                   | 1                | Window opening      | 30 minutes Active air sampling 80ml/min                           | N/A                                        | N/A | 3                   |

| Substances                        | References Location                 | Period                     | Type of schools           | Number of buildings | Number of points | Type of ventilation | Measurement protocol                                     | Concentration ( $\mu\text{g}/\text{m}^3$ ) |                         |                         |
|-----------------------------------|-------------------------------------|----------------------------|---------------------------|---------------------|------------------|---------------------|----------------------------------------------------------|--------------------------------------------|-------------------------|-------------------------|
|                                   |                                     |                            |                           |                     |                  |                     |                                                          | Min                                        | Max                     | AM $\pm$ SD             |
| <b>Trichloroethylene</b>          | Papadopoulos et al. 2020 Greece [5] | December 2019              | University                | 1                   | 1                | Window opening      | 30 minutes<br>Active air sampling<br>80ml/min            | N/A                                        | N/A                     | < LD                    |
| <b>Trichloroethylene</b>          | Becerra et al. 2020 Spain [53]      | Spring 2020                | Elementary Secondary      | 18                  | 18               | Window opening      | 5 days on continuous,<br>Diffusive sampling              | N/A                                        | N/A                     | <0.1                    |
| <b>Trichloroethylene</b>          | Becerra et al. 2020 Spain [53]      | Spring 2020                | Elementary Secondary      | 18                  | 18               | Window opening      | 5 days on continuous,<br>Diffusive sampling              | N/A                                        | N/A                     | <0.1                    |
| <b>TVOCs</b>                      | Harcarova et al. 2020 Slovakia [3]  | Winter 2020                | Elementary                | 1                   | 1                | Window opening      | 1 hour on continuous<br>Photoionization UV detector      | 1416                                       | 3367                    | 2256 $\pm$ 581.4        |
| <b>TVOCs</b>                      | Harcarova et al. 2020 Slovakia [3]  | Winter 2020                | Elementary                | 1                   | 1                | Window opening      | 1 hour on continuous<br>Photoionization UV detector      | 2490                                       | 3150                    | 2847 $\pm$ 174.9        |
| <b>TVOCs</b>                      | Barmparetos et al. 2018 Greece [29] | June to July 2017          | Elementary                | 1                   | 1                | Window opening      | 24h on continuous at 15 min interval<br>Portable sensors | < 1 ppm                                    | 15.00 ppm to 30.00 ppm  | 6.63 ppm to 13.33 ppm   |
| <b>TVOCs</b>                      | Nunes et al., 2016 Portugal [56]    | 1                          | Nursery                   | 4                   | 9                | Window opening      | 2 to 3 weekdays + 2 weekend days on continuous           | 79.23 - 142.01                             | Ranges: 174.17 - 488.33 | Ranges: 155.22 - 159.40 |
| <b><math>\alpha</math>-pinene</b> | Villanueva et al. 2018 Spain [61]   | Spring 2013                | Elementary (Urban)        | 18                  | 18               | Window opening      | 2 weeks on continuous,<br>passive samplers               | 0,3                                        | 3,7                     | 1,6 $\pm$ 1,4           |
| <b><math>\alpha</math>-pinene</b> | Villanueva et al. 2018 Spain [61]   | Spring 2013                | Elementary (Rural)        | 18                  | 18               | Window opening      | 2 weeks on continuous,<br>Passive samplers               | 1.5                                        | 6                       | 3 $\pm$ 1.6             |
| <b><math>\alpha</math>-pinene</b> | Villanueva et al. 2018 Spain [61]   | Spring 2013                | Elementary (Industrial)   | 18                  | 18               | Window opening      | 2 weeks on continuous,<br>Passive samplers               | 0.6                                        | 3.6                     | 1.8 $\pm$ 1.2           |
| <b><math>\alpha</math>-pinene</b> | Zhong et al. 2016 USA [32]          | October 2015 to March 2016 | Elementary and K8 schools | 37                  | 144              | HVAC                | 48h on continuous<br>Tenax passive sampler               | N/A                                        | 55.7                    | 1.5                     |

| Substances                        | References Location                 | Period                   | Type of schools      | Number of buildings | Number of points | Type of ventilation | Measurement protocol                                              | Concentration ( $\mu\text{g}/\text{m}^3$ ) |     |                   |
|-----------------------------------|-------------------------------------|--------------------------|----------------------|---------------------|------------------|---------------------|-------------------------------------------------------------------|--------------------------------------------|-----|-------------------|
|                                   |                                     |                          |                      |                     |                  |                     |                                                                   | Min                                        | Max | AM $\pm$ SD       |
| <b><math>\alpha</math>-pinene</b> | Gennaro et al., 2013 Italy [62]     | 2013                     | Elementary Secondary | 1                   | 3                | Window opening      | 48h on continuous Tenax passive sampler                           | 0.6                                        | 5.1 | N/A               |
| <b><math>\alpha</math>-pinene</b> | Madureira et al. 2016 Portugal [34] | Heating season 2011-2013 | Elementary           | 20                  | 80               | Window opening      | 5 days on continuous (Monday to Friday) Diffusive passive sampler | 1                                          | 32  | 3,4               |
| <b><math>\alpha</math>-pinene</b> | Papadopoulos et al. 2020 Greece [5] | December 2019            | University           | 1                   | 1                | Window opening      | 30 minutes Active air sampling 80ml/min                           | N/A                                        | N/A | <DL               |
| <b><math>\alpha</math>-pinene</b> | Papadopoulos et al. 2020 Greece [5] | December 2019            | University           | 1                   | 1                | Window opening      | 30 minutes Active air sampling 80ml/min                           | N/A                                        | N/A | 1                 |
| <b><math>\alpha</math>-pinene</b> | Becerra et al. 2020 Spain [53]      | Spring 2020              | Elementary Secondary | 18                  | 18               | Window opening      | 5 days on continuous, Diffusive sampling                          | N/A                                        | N/A | Ranges: <LD - 0.8 |
| <b><math>\alpha</math>-pinene</b> | Becerra et al. 2020 Spain [53]      | Spring 2020              | Elementary Secondary | 18                  | 18               | Window opening      | 5 days on continuous, Diffusive sampling                          | N/A                                        | N/A | Ranges: <LD - 0.2 |



**1.13 Table S13: Measurements of particulate matter (PM) in schools in Europe and North America since 2010**

| PM size (µm) | References Location            | Period (years)                                              | Type of school         | Number of schools | Number of total samples | Type of ventilation   | Occupancy | Measurement protocol                                                                                                                                                      | Results<br>Gravimetric: µg/m <sup>3</sup><br>Counts: particles/cm <sup>3</sup> |     |           |
|--------------|--------------------------------|-------------------------------------------------------------|------------------------|-------------------|-------------------------|-----------------------|-----------|---------------------------------------------------------------------------------------------------------------------------------------------------------------------------|--------------------------------------------------------------------------------|-----|-----------|
|              |                                |                                                             |                        |                   |                         |                       |           |                                                                                                                                                                           | Min                                                                            | Max | AM ± SD   |
| 0.5          | Rovelli et al. 2014 Italy [59] | November/2011 to 03/2012 and November 2012 to February 2013 | Elementary Secondary   | 7                 | 14                      | Window opening        | Yes       | Nephelometer 3 L/min                                                                                                                                                      | N/A                                                                            | N/A | 11 ± 5.3  |
| 1            | Rovelli et al. 2014 Italy [59] | November 2011 to 03/2011 and November 2012 to February 2013 | Elementary Secondary   | 7                 | 14                      | Window opening        | Yes       | Nephelometer 3 L/min                                                                                                                                                      | N/A                                                                            | N/A | 19 ± 7.2  |
| 2.5          | Rovelli et al. 2014 Italy [59] | November 2011 to 03/2011 and November 2012 to February 2013 | Elementary Secondary   | 7                 | 14                      | Window opening        | Yes       | Nephelometer 3 L/min and equipped with a size-selective impactor for PM <sub>2.5</sub>                                                                                    | N/A                                                                            | N/A | 33 ± 10.0 |
| 5            | Rovelli et al. 2014 Italy [59] | November 2011 to 03/2011 and November 2012 to February 2013 | Elementary Secondary   | 7                 | 14                      | Window opening        | Yes       | Nephelometer 3 L/min                                                                                                                                                      | N/A                                                                            | N/A | 104 ± 50  |
| 10           | Rovelli et al. 2014 Italy [59] | November 2011 to 03/2011 and November 2012 to February 2013 | Elementary Secondary   | 7                 | 14                      | Naturally ventilated, | Yes       | Nephelometer 3 L/min                                                                                                                                                      | N/A                                                                            | N/A | 134 ± 68  |
| 2.5          | Becerra et al. 2020 Spain [53] | March 2017                                                  | Elementary High school | 9                 | 9                       | Window opening        | Yes       | Optical particle counter at 1.2 L/min<br>2 days continuously<br>2 minutes time interval<br>0.3 to 10 µm<br>0 to 3,000 particles/cm <sup>3</sup><br>Accuracy (5% ± 0.5 µm) | 2.2                                                                            | 27  | 9.2 ± 7.4 |

| PM size (µm) | References Location                        | Period (years)                 | Type of school              | Number of schools | Number of total samples | Type of ventilation                      | Occupancy | Measurement protocol                                                                                                                                                                                          | Results<br>Gravimetric: µg/m <sup>3</sup><br>Counts: particles/cm <sup>3</sup> |               |                    |
|--------------|--------------------------------------------|--------------------------------|-----------------------------|-------------------|-------------------------|------------------------------------------|-----------|---------------------------------------------------------------------------------------------------------------------------------------------------------------------------------------------------------------|--------------------------------------------------------------------------------|---------------|--------------------|
|              |                                            |                                |                             |                   |                         |                                          |           |                                                                                                                                                                                                               | Min                                                                            | Max           | AM ± SD            |
| 10           | Becerra et al. 2020 Spain [53]             | March 2017                     | Elementary High school      | 9                 | 9                       | Window opening                           | Yes       | Optical particle counter at 1.2 L/min<br>2 days continuously<br>2 minutes time interval<br>Size: 0.3 to 10 µmm<br>0 to 3,000 particles/cm <sup>3</sup><br>Accuracy (5% ± 0.5 µm)                              | 1.3                                                                            | 12            | 4.4 ± 2.9          |
| 2.5          | Rivas et al. 2014 Spain [63]               | February 2012 to February 2013 | Elementary school           | 39                | 39                      | Window opening                           | Yes       | Gravimetric<br>Quartz fiber filter<br>30 m <sup>3</sup> /h<br>8 hours per day<br>continuously for 4 days<br>for 2 weeks<br>Indoor and outdoor                                                                 | 13                                                                             | 84            | 37 ± 13            |
| 2.5          | Vornanen Winqvist et al. 2020 Finland [11] | April 2016 to September 2016   | Secondary                   | 1                 | 1                       | Mechanical ventilation                   | Yes       | Measure continuously with PM meter<br>MiePDR1500                                                                                                                                                              | N/A                                                                            | 5.8           | 1.7                |
| 0.1          | Slezakova et al. 2019 Portugal [64]        | January 2014 to April 2014     | Elementary                  | 10                | 20                      | Mechanical ventilation<br>Window opening | Yes       | Portable condensation particle counter<br>5 days<br>(Monday to Friday)<br>8 hours per day<br>1 minute time interval<br>0.7 L/min<br>Size: 20 to 1000 nm<br>Up to 5 x10 <sup>5</sup> particles/cm <sup>3</sup> | Count: 1123                                                                    | Count: 99,923 | Count: 7798 ± 2981 |
| 2.5          | Harcarova et al. 2020 Slovakia [3]         | Winter 2019                    | Elementary school<br>Rural, | 1                 | 2                       | Window opening                           | Yes       | Optical particle counter<br>50 minutes<br>Size: 0.5 to 10 µm<br>2.83 L/min                                                                                                                                    | 9.1                                                                            | 20            | 14 ± 1.7           |

| PM size (µm) | References Location                | Period (years)                       | Type of school             | Number of schools | Number of total samples | Type of ventilation | Occupancy | Measurement protocol                                                                   | Results<br>Gravimetric: µg/m <sup>3</sup><br>Counts: particles/cm <sup>3</sup> |                   |                        |
|--------------|------------------------------------|--------------------------------------|----------------------------|-------------------|-------------------------|---------------------|-----------|----------------------------------------------------------------------------------------|--------------------------------------------------------------------------------|-------------------|------------------------|
|              |                                    |                                      |                            |                   |                         |                     |           |                                                                                        | Min                                                                            | Max               | AM ± SD                |
| 10           | Harcarova et al. 2020 Slovakia [3] | Winter 2019                          | Elementary school<br>Rural | 1                 | 2                       | Window opening      | Yes       | Optical particle counter<br>50 minutes<br>Size: 0.5 to 10 µm<br>2.83 L/min             | 34                                                                             | 273               | 122 ± 33               |
| 2.5          | Erlandson et al. 2017 USA [25]     | Yearlong 2019 (Fall, Winter, Spring) | University<br>Rural        | 1                 | 70                      | Window opening      | Yes       | Gravimetric<br>Aluminum Cyclone<br>GK2.05<br>PVC filter<br>4 L/min<br>48 hours         | 0.5 <sup>a</sup>                                                               | 11 <sup>a</sup>   | 1.9 ± 2.2 <sup>a</sup> |
| 4            | Erlandson et al. 2017 USA [25]     | Yearlong 2019 (Fall, Winter, Spring) | University<br>Rural        | 1                 | 70                      | Window opening      | Yes       | Gravimetric<br>Aluminum Cyclone<br>PVC filter<br>4 L/min<br>48 hours                   | 1.2 <sup>a</sup>                                                               | 45 <sup>a</sup>   | 5.3 ± 2.3 <sup>a</sup> |
| 10           | Erlandson et al. 2017 USA [25]     | Yearlong 2019 (Fall, Winter, Spring) | University<br>Rural        | 1                 | 70                      | Window opening      | Yes       | Gravimetric<br>SKC button sampler<br>PVC filter<br>4 L/min<br>48 hours                 | 1.1 <sup>a</sup>                                                               | 52.7 <sup>a</sup> | 7.5 ± 2.4 <sup>a</sup> |
| 2.5          | Alves et al. 2013 Portugal [21]    | January 2012                         | Elementary<br>Urban        | 3                 | 3                       | Window opening      | Yes       | Optical particle counter (station)<br>5 days<br>Monday to Friday<br>Indoor and outdoor | N/A                                                                            | N/A               | 44 - 117               |
| 10           | Alves et al. 2013 Portugal [21]    | January 2012                         | Elementary<br>Urban        | 3                 | 3                       | Window opening      | Yes       | Optical particle counter (station)<br>5 days<br>Monday to Friday<br>Indoor and outdoor | N/A                                                                            | N/A               | 362 ± 84               |

| PM size (µm) | References Location                 | Period (years)                | Type of school          | Number of schools | Number of total samples | Type of ventilation                       | Occupancy | Measurement protocol                                                                              | Results<br>Gravimetric: µg/m <sup>3</sup><br>Counts: particles/cm <sup>3</sup> |      |                      |
|--------------|-------------------------------------|-------------------------------|-------------------------|-------------------|-------------------------|-------------------------------------------|-----------|---------------------------------------------------------------------------------------------------|--------------------------------------------------------------------------------|------|----------------------|
|              |                                     |                               |                         |                   |                         |                                           |           |                                                                                                   | Min                                                                            | Max  | AM ± SD              |
| 2.5          | Canha et al. 2016 France [26]       | January to June 2010          | Nursery Elementary      | 17                | 51                      | Mechanical ventilation and window opening | Yes       | Gravimetric PTFE filter<br>1.8 L/min<br>5 days<br>Monday to Friday                                | N/A                                                                            | N/A  | 22 ± 8               |
| 2.5          | Mainka et al. 2015 Poland [57]      | December 2013 to January 2014 | N/A                     | 2                 | 2                       | N/A                                       | Yes       | Gravimetric Polycarbonate filter<br>3 stages impactor<br>30L/min,<br>5 days<br>Monday to Friday   | 47                                                                             | 106  | N/A                  |
| 2.5          | Jovanovic et al. 2014 Serbia [27]   | 2012                          | Elementary              | 1                 | 5                       | Window opening                            | Yes       | Gravimetric Quartz filter<br>3.2 m <sup>3</sup> /h<br>192h<br>24 hours interval                   | 27                                                                             | 64   | 44 ± 13              |
| 2.5          | Vilcekova et al. 2017 Slovakia [15] | 2016                          | Elementary              | 1                 | 5                       | Window opening                            | Yes       | Optical particle counter<br>Size: 0.3 to 10 µm<br>2.83 L/min<br>1 week<br>5 minutes time interval | 5.1                                                                            | 51   | 10 ± 1.2 to 25 ± 4.6 |
| 10           | Vilcekova et al. 2017 Slovakia [15] | 2016                          | Elementary              | 1                 | 5                       | Window opening                            | Yes       | Optical particle counter<br>Size: 0.3 to 10 µm<br>2.83 L/min<br>1 week<br>5 minutes time interval | 32                                                                             | 2061 | 96 ± 49 to 406 ± 292 |
| 2.5          | Sivanantham et al. 2021 France [54] | 2013 -2017                    | Kindergarten Elementary | 294               | 65823**                 | Window opening Mechanical ventilation     | Yes       | Gravimetric Teflon PTFE filter<br>Monday to Friday                                                | N/A                                                                            | N/A  | 20 ± 1.0             |
| 2.5          | Stamp et al. 2020 UK[33]            | 2014                          | Secondary               | 1                 | 3                       | Mechanical and by opening window          | Yes       | Optical particle counter<br>6 – 10 months continuously                                            | N/A                                                                            | N/A  | N/A                  |

| PM size (µm) | References Location                 | Period (years)                   | Type of school | Number of schools | Number of total samples | Type of ventilation                       | Occupancy | Measurement protocol                                                                     | Results<br>Gravimetric: µg/m <sup>3</sup><br>Counts: particles/cm <sup>3</sup> |      |             |
|--------------|-------------------------------------|----------------------------------|----------------|-------------------|-------------------------|-------------------------------------------|-----------|------------------------------------------------------------------------------------------|--------------------------------------------------------------------------------|------|-------------|
|              |                                     |                                  |                |                   |                         |                                           |           |                                                                                          | Min                                                                            | Max  | AM ± SD     |
| 10           | Stamp et al. 2020 UK [33]           | 2014                             | Secondary      | 1                 | 3                       | Mechanical and by opening window          | Yes       | Optical particle counter 6 – 10 months continuously                                      | N/A                                                                            | N/A  | N/A         |
| 2.5          | Madureira et al. 2015 Portugal [34] | November to March (2011 to 2013) | Elementary     | 20                | 73                      | Opening windows                           | Yes       | Portable TSI DustTrak DRX photometers 1 day measurement                                  | 39                                                                             | 244  | 82          |
| 10           | Madureira et al. 2015 Portugal [34] | November to March (2011 to 2013) | Elementary     | 20                | 73                      | Opening windows                           | Yes       | Portable TSI DustTrak DRX photometers 1 day measurement                                  | 56                                                                             | 320  | 127         |
| 2.5          | Csobod et al. 2014 Europe [35]      | Non heating season 2014          | Kindergarten   | 25                | 25                      | Window opening and mechanical ventilation | Yes       | Gravimetric measurement, 8 hours per day, Monday to Friday                               | 14                                                                             | 163  | 56 ± 34     |
| 2.5          | Csobod et al. 2014 Europe [35]      | Non heating season 2014          | Elementary     | 300               | 300                     | Window opening and mechanical ventilation | Yes       | Gravimetric measurement, 8 hours per day, Monday to Friday                               | 4                                                                              | 250  | 44 ± 37     |
| 2.5          | Oliveira et al. 2016 Portugal [36]  | April – June 2013                | Kindergarten   | 2                 | 2                       | Window opening                            | Yes       | Gravimetric measurement over a period of 24 hours                                        | 5.8                                                                            | 34.8 | 14.2 – 18.4 |
| 1            | Oliveira et al. 2016 Portugal [36]  | April – June 2013                | Kindergarten   | 2                 | 2                       | Window opening                            | Yes       | Gravimetric measurement over a period of 24 hours                                        | 1.5                                                                            | 26.1 | 12.4 – 15.8 |
| 2.5          | Oliveira et al. 2017 Portugal [37]  | January – April 2014             | Elementary     | 10                | 10                      | Opening window                            | Yes       | Gravimetric measurement over 3 days continuously                                         | 4.5                                                                            | 85   | 9.2 to 66   |
| 2.5          | Liaud et al. France [65]            | April - May 2014                 | High school    | 1                 | 36                      | Window opening                            | Yes       | Three-stages cascade impactors HPLC/PAD/fluorescence 3-4 days 119 - 181.3 m <sup>3</sup> | N/A                                                                            | N/A  | N/A         |

| PM size (µm) | References Location          | Period (years) | Type of school | Number of schools | Number of total samples | Type of ventilation | Occupancy | Measurement protocol                                                                                              | Results                                                             |     |         |
|--------------|------------------------------|----------------|----------------|-------------------|-------------------------|---------------------|-----------|-------------------------------------------------------------------------------------------------------------------|---------------------------------------------------------------------|-----|---------|
|              |                              |                |                |                   |                         |                     |           |                                                                                                                   | Gravimetric: µg/m <sup>3</sup><br>Counts: particles/cm <sup>3</sup> |     |         |
|              |                              |                |                |                   |                         |                     |           |                                                                                                                   | Min                                                                 | Max | AM ± SD |
| 2.5          | Krugly et al. Lithuania [66] | 2011-2012      | Elementary     | 5                 | 25                      | Window opening      | Yes       | 25 mm quartz filter (pore size 1.6 µm)<br>8 hours<br>10 L/min flow rate<br>0,48m <sup>3</sup> – 14 m <sup>3</sup> | N/A                                                                 | N/A | N/A     |

<sup>a</sup> geometric mean and geometric standard deviation; DL: detection limit; HVAC: Heat, ventilation and air conditioning; AM: arithmetic mean; SD: standard deviation; \*\* adjusted to the French stock of schools

**1.14 Table S14: Measurements of flame retardants (SVOCs) in schools across Europe and North America since 2010**

| SVOCs             | References<br>Location                | Measurement<br>period | Type of<br>schools | N° of<br>schools | N° of<br>samples | Measurement protocol                                                 | Concentration (ng/m <sup>3</sup> ) |     |       |        |
|-------------------|---------------------------------------|-----------------------|--------------------|------------------|------------------|----------------------------------------------------------------------|------------------------------------|-----|-------|--------|
|                   |                                       |                       |                    |                  |                  |                                                                      | Phase                              | Min | Max   | AM     |
| Tributylphosphate | Cequier et al.<br>2014 Norway<br>[67] | January - May<br>2012 | Elementary         | 2                | 6                | PUF Filter<br>12 L/min flow rate for 24 h.                           | Air                                | -   | 4.6   | 3.1    |
| Tributylphosphate | Persson et al.<br>2018 Sweden<br>[68] | 2015-2016             | Kindergarten       | 1                | 12               | 24h on continuous<br>0.2 L/min flow rate with<br>XAD-2 absorbent     | Gas                                | <DL | <DL   | <DL    |
| Tributylphosphate | Persson et al.<br>2018 Sweden<br>[68] | 2015-2016             | Kindergarten       | 1                | 12               | 24h on continuous at 0.2<br>L/min flow rate with XAD-<br>2 absorbent | Gas                                | <DL | 21    | <DL    |
| Tributylphosphate | Persson et al.<br>2018 Sweden<br>[68] | 2015-2016             | Kindergarten       | 1                | 12               | 24h on continuous at 0.2<br>L/min flow rate with XAD-<br>2 absorbent | Gas                                | <DL | 82    | <DL    |
| Tributylphosphate | Persson et al.<br>2018 Sweden<br>[68] | 2015-2016             | Kindergarten       | 1                | 12               | 24h on continuous at 0.2<br>L/min flow rate with XAD-<br>2 absorbent | Gas                                | <DL | 150   | 36     |
| Tributylphosphate | Raffy et al.<br>2017 France<br>[69]   | 2010                  | Schools            | 30               | 62               | Φ 76 mm PUF, with 4.5<br>days air pump at 2.1 L/min                  | Air                                | N/A | N/A   | N/A    |
| BDE47             | Cequier et al.<br>2014 Norway<br>[67] | January - May<br>2012 | Elementary         | 2                | 6                | PUF Filter<br>12 L/min flow rate for 24 h.                           | Air                                | N/A | 0.5   | 0.2    |
| BDE85             | Cequier et al.<br>2014 Norway<br>[67] | January - May<br>2012 | Elementary         | 2                | 6                | PUF Filter<br>12 L/min flow rate for 24 h.                           | Air                                | N/A | 0.001 | 0.0007 |
| BDE99             | Cequier et al.<br>2014 Norway<br>[67] | January - May<br>2012 | Elementary         | 2                | 6                | PUF Filter<br>12 L/min flow rate for 24 h.                           | Air                                | N/A | 0.05  | 0.03   |

| SVOCs  | References<br>Location                | Measurement<br>period | Type of<br>schools | N° of<br>schools | N° of<br>samples | Measurement protocol                                | Concentration (ng/m <sup>3</sup> ) |     |       |        |
|--------|---------------------------------------|-----------------------|--------------------|------------------|------------------|-----------------------------------------------------|------------------------------------|-----|-------|--------|
|        |                                       |                       |                    |                  |                  |                                                     | Phase                              | Min | Max   | AM     |
| BDE99  | Raffy et al.<br>2017 France<br>[69]   | 2010                  | Schools            | 30               | 62               | Φ 76 mm PUF, with 4.5<br>days air pump at 2.1 L/min | Air                                | N/A | -     | -      |
| BDE100 | Cequier et al.<br>2014 Norway<br>[67] | January - May<br>2012 | Elementary         | 2                | 6                | PUF Filter<br>12 L/min flow rate for 24 h.          | Air                                | N/A | 0.02  | 0.009  |
| BDE153 | Cequier et al.<br>2014 Norway<br>[67] | January - May<br>2012 | Elementary         | 2                | 6                | PUF Filter<br>12 L/min flow rate for 24 h.          | Air                                | N/A | 0.002 | 0.0007 |



**1.15 Table S15: Measurements of polycyclic aromatic hydrocarbons (SVOCs) in schools across Europe and North America since 2010**

| PAH<br>ng/m <sup>3</sup> | Reference<br>Location                              | Measurement<br>period | Type of<br>schools | Number<br>of<br>buildings | Number<br>of<br>samples | Measurement protocol                                                                                 | Concentration (ng/m <sup>3</sup> ) |       |       |                 |
|--------------------------|----------------------------------------------------|-----------------------|--------------------|---------------------------|-------------------------|------------------------------------------------------------------------------------------------------|------------------------------------|-------|-------|-----------------|
|                          |                                                    |                       |                    |                           |                         |                                                                                                      | Phase                              | Min   | Max   | AM              |
| Acenaphtene              | Oliveira et al.<br>Paranhos, 2017 [55]<br>Portugal | May - June 2015       | Kindergarten       | 1                         | 88                      | 75 mm pre-cleaned PUF plugs<br>24 hours<br>38.3 L/min flow rate at 55 m <sup>3</sup> total           | Air                                | 0,03  | 0,8   | N/A             |
| Acenaphtene              | Oliveira et al. 2016<br>[36]<br>Chaves, Portugal   | May - June 2015       | Kindergarten       | 1                         | 64                      | 75 mm pre-cleaned PUF plugs<br>24 hours<br>38.3 L/min at 55 m <sup>3</sup> total                     | Air                                | 0,7   | 8,19  | N/A             |
| Acenaphtene              | Oliveira et al. 2016<br>[36]<br>Oporto, Portugal   | January-April<br>2014 | Primary<br>school  | 10                        | 60                      | 47 mm PTFE filter<br>24 hours<br>38.3 L/min at 300m <sup>3</sup> total                               | PM <sub>2,5</sub>                  | 0,7   | 2,4   | 0,9 - 2,3       |
| Acenaphtene              | Živković et al. 2015<br>Serbia [38]                | Heating               | Multi schools      | 4                         | 4                       | PUF Quartz filter (TSP)<br>1 week on continuous<br>38 L/min flow rate at 386 m <sup>3</sup> total    | Air                                | 7.15  | 72.02 | 7.15 -<br>72.02 |
| Acenaphtene              | Živković et al. 2015<br>Serbia [38]                | Non- Heating          | Multi schools      | 4                         | 4                       | PUF<br>Quartz filter (TSP)<br>1 week on continuous<br>38 L/min flow rate at 386 m <sup>3</sup> total | Air                                | 0.7   | 8.92  | 0.70 -<br>8.92  |
| Acenaphtene              | Liaud et al.<br>2021 France [65]                   | April - May 2014      | High school        | 1                         | 36                      | Three-stages cascade impactors<br>HPLC/PAD/fluorescence<br>3-4 days<br>119 - 181.3 m <sup>3</sup>    | PM <sub>1</sub>                    | N/A   | N/A   | 0.0003          |
|                          |                                                    |                       |                    |                           |                         |                                                                                                      | PM <sub>2,5</sub>                  | N/A   | N/A   | 0.0015          |
|                          |                                                    |                       |                    |                           |                         |                                                                                                      | PM <sub>10</sub>                   | N/A   | N/A   | 0.002           |
| Anthracene               | Oliveira et al.<br>Paranhos, 2017 [55]<br>Portugal | May - June 2015       | Kindergarten       | 1                         | 88                      | 75 mm pre-cleaned PUF plugs<br>24 hours<br>38.3 L/min flow rate at 55 m <sup>3</sup> total           | Air                                | 0.005 | 0.7   | N/A             |
| Anthracene               | Oliveira et al. 2016<br>[36]<br>Chaves, Portugal   | May - June 2015       | Kindergarten       | 1                         | 64                      | 75 mm pre-cleaned PUF plugs<br>24 hours<br>38.3 L/min at 55 m <sup>3</sup> total                     | Air                                | 0.3   | 0.6   | N/A             |
| Anthracene               | Oliveira et al. 2016<br>[36]<br>Oporto, Portugal   | January-April<br>2014 | Primary<br>school  | 10                        | 60                      | 47 mm PTFE filter<br>24 hours<br>38.3 L/min at 300m <sup>3</sup> total                               | PM <sub>2,5</sub>                  | N/A   | N/A   | 0.003-<br>0.08  |

| PAH<br>ng/m <sup>3</sup> | Reference<br>Location                              | Measurement<br>period | Type of<br>schools | Number<br>of<br>buildings | Number<br>of<br>samples | Measurement protocol                                                                                 | Concentration (ng/m <sup>3</sup> ) |      |      |                 |
|--------------------------|----------------------------------------------------|-----------------------|--------------------|---------------------------|-------------------------|------------------------------------------------------------------------------------------------------|------------------------------------|------|------|-----------------|
|                          |                                                    |                       |                    |                           |                         |                                                                                                      | Phase                              | Min  | Max  | AM              |
| Anthracene               | Živković et al. 2015<br>Serbia [38]                | Heating               | Multi schools      | 4                         | 4                       | PUF Quartz filter (TSP)<br>1 week on continuous<br>38 L/min flow rate at 386 m <sup>3</sup> total    | Air                                | N/A  | N/A  | 1.00 -<br>15.83 |
| Anthracene               | Živković et al. 2015<br>Serbia [38]                | Non- Heating          | Multi schools      | 4                         | 4                       | PUF<br>Quartz filter (TSP)<br>1 week on continuous<br>38 L/min flow rate at 386 m <sup>3</sup> total | Air                                | N/A  | N/A  | 0.45 -<br>2.93  |
| Anthracene               | Liaud et al.<br>2021 France [65]                   | April - May 2014      | High school        | 1                         | 36                      | Three-stages cascade impactors<br>HPLC/PAD/fluorescence<br>3-4 days<br>119 - 181.3 m <sup>3</sup>    | PM <sub>1</sub>                    | N/A  | N/A  | 0.0024          |
|                          |                                                    |                       |                    |                           |                         |                                                                                                      | PM <sub>2.5</sub>                  | N/A  | N/A  | 0.0034          |
|                          |                                                    |                       |                    |                           |                         |                                                                                                      | PM <sub>10</sub>                   | N/A  | N/A  | 0.004           |
| Benzo[a]pyrene           | Liaud et al.<br>2021 France [65]                   | April - May 2014      | High school        | 1                         | 36                      | Three-stages cascade impactors<br>HPLC/PAD/fluorescence<br>3-4 days<br>119 - 181.3 m <sup>3</sup>    | PM <sub>1</sub>                    | N/A  | N/A  | 0.0225          |
|                          |                                                    |                       |                    |                           |                         |                                                                                                      | PM <sub>2.5</sub>                  | N/A  | N/A  | 0.0248          |
|                          |                                                    |                       |                    |                           |                         |                                                                                                      | PM <sub>10</sub>                   | N/A  | N/A  | 0.0252          |
| Benzo[g,h,i]perylene     | Liaud et al.<br>2021 France [65]                   | April - May 2014      | High school        | 1                         | 36                      | Three-stages cascade impactors<br>HPLC/PAD/fluorescence<br>3-4 days<br>119 - 181.3 m <sup>3</sup>    | PM <sub>1</sub>                    | N/A  | N/A  | 0.0612          |
|                          |                                                    |                       |                    |                           |                         |                                                                                                      | PM <sub>2.5</sub>                  | N/A  | N/A  | 0.0671          |
|                          |                                                    |                       |                    |                           |                         |                                                                                                      | PM <sub>10</sub>                   | N/A  | N/A  | 0.0751          |
| Benzo[k]fluoranthene     | Liaud et al.<br>2021 France [65]                   | April - May 2014      | High school        | 1                         | 36                      | Three-stages cascade impactors<br>HPLC/PAD/fluorescence<br>3-4 days<br>119 - 181.3 m <sup>3</sup>    | PM <sub>1</sub>                    | N/A  | N/A  | 0.0121          |
|                          |                                                    |                       |                    |                           |                         |                                                                                                      | PM <sub>2.5</sub>                  | N/A  | N/A  | 0.0137          |
|                          |                                                    |                       |                    |                           |                         |                                                                                                      | PM <sub>10</sub>                   | N/A  | N/A  | 0.0139          |
| Benzo[a]anthracene       | Liaud et al.<br>2021 France [65]                   | April - May 2014      | High school        | 1                         | 36                      | Three-stages cascade impactors<br>HPLC/PAD/fluorescence<br>3-4 days<br>119 - 181.3 m <sup>3</sup>    | PM <sub>1</sub>                    | N/A  | N/A  | 0.0075          |
|                          |                                                    |                       |                    |                           |                         |                                                                                                      | PM <sub>2.5</sub>                  | N/A  | N/A  | 0.0083          |
|                          |                                                    |                       |                    |                           |                         |                                                                                                      | PM <sub>10</sub>                   | N/A  | N/A  | 0.0088          |
| Benzo[a]pyrene           | Oliveira et al.<br>Paranhos, 2017 [55]<br>Portugal | May - June 2015       | Kindergarten       | 1                         | 88                      | 75 mm pre-cleaned PUF plugs<br>24 hours<br>38.3 L/min flow rate at 55 m <sup>3</sup> total           | Air                                | 0.05 | 0.08 |                 |

| PAH<br>ng/m <sup>3</sup> | Reference<br>Location                            | Measurement<br>period | Type of<br>schools | Number<br>of<br>buildings | Number<br>of<br>samples | Measurement protocol                                                                                                       | Concentration (ng/m <sup>3</sup> ) |      |     |                |
|--------------------------|--------------------------------------------------|-----------------------|--------------------|---------------------------|-------------------------|----------------------------------------------------------------------------------------------------------------------------|------------------------------------|------|-----|----------------|
|                          |                                                  |                       |                    |                           |                         |                                                                                                                            | Phase                              | Min  | Max | AM             |
| Benzoapyrene             | Oliveira et al. 2016<br>[36]<br>Chaves, Portugal | May - June 2015       | Kindergarten       | 1                         | 64                      | 75 mm pre-cleaned PUF plugs<br>24 hours<br>38.3 L/min at 55 m <sup>3</sup> total                                           | Air                                | 0.06 | 0.1 |                |
| Benzoapyrene             | Oliveira et al. 2016<br>[36]<br>Oporto, Portugal | January-April<br>2014 | Primary<br>school  | 10                        | 60                      | 47 mm PTFE filter<br>24 hours<br>38.3 L/min at 300m <sup>3</sup> total                                                     | PM <sub>2.5</sub>                  | 0.03 | 4.2 | 0.04 - 3.5     |
| Benzoapyrene             | Živković et al. 2016<br>Serbia [38]              | Heating               | Multi schools      | 4                         | 4                       | PUF Quartz filter (TSP)<br>1 week on continuous<br>38 L/min flow rate at 386 m <sup>3</sup> total                          | Air                                | N/A  | N/A | 1.20 -<br>9.84 |
| Benzoapyrene             | Živković et al. 2016<br>Serbia [38]              | Non- Heating          | Multi schools      | 4                         | 4                       | PUF<br>Quartz filter (TSP)<br>1 week on continuous<br>38 L/min flow rate at 386 m <sup>3</sup> total                       | Air                                | N/A  | N/A | 0.11 -<br>0.78 |
| Benzoapyrene             | Romagnoli et al.<br>2014 Italy [70]              | Winter 2011-<br>20012 | Multi schools      | 6                         | 18                      | Quartz filter<br>24 hours<br>6-10 L/min flow rate                                                                          | PM <sub>2.5</sub>                  | 0.71 | 1.6 | 1.2            |
| Benzoapyrene             | Krugly et al. 2014<br>Lithuania [66]             | 2011-2012             | Elementary         | 5                         | 25                      | 25 mm quartz filter (pore size 1.6 µm)<br>8 hours<br>10 L/min flow rate at 0,48m <sup>3</sup> – 14 m <sup>3</sup><br>total | PM <sub>2.5</sub>                  | N/A  | 8.4 | N/A            |
| Benzobfluoranthene       | Liaud et al.<br>2021 France [65]                 | April - May 2014      | High school        | 1                         | 36                      | Three-stages cascade impactors<br>HPLC/PAD/fluorescence<br>3-4 days<br>119 - 181.3 m <sup>3</sup>                          | PM <sub>1</sub>                    | N/A  | N/A | 0.0339         |
|                          |                                                  |                       |                    |                           |                         |                                                                                                                            | PM <sub>2.5</sub>                  | N/A  | N/A | 0.0378         |
|                          |                                                  |                       |                    |                           |                         |                                                                                                                            | PM <sub>10</sub>                   | N/A  | N/A | 0.0385         |
| Chrysene                 | Liaud et al.<br>2021 France [65]                 | April - May 2014      | High school        | 1                         | 36                      | Three-stages cascade impactors<br>HPLC/PAD/fluorescence<br>3-4 days<br>119 - 181.3 m <sup>3</sup>                          | PM <sub>1</sub>                    | N/A  | N/A | 0.0097         |
|                          |                                                  |                       |                    |                           |                         |                                                                                                                            | PM <sub>2.5</sub>                  | N/A  | N/A | 0.0114         |
|                          |                                                  |                       |                    |                           |                         |                                                                                                                            | PM <sub>10</sub>                   | N/A  | N/A | 0.0126         |
| Dibenzo[a,h]anthracene   | Liaud et al.<br>2021 France [65]                 | April - May 2014      | High school        | 1                         | 36                      | Three-stages cascade impactors<br>HPLC/PAD/fluorescence<br>3-4 days<br>119 - 181.3 m <sup>3</sup>                          | PM <sub>1</sub>                    | N/A  | N/A | 0.0142         |
|                          |                                                  |                       |                    |                           |                         |                                                                                                                            | PM <sub>2.5</sub>                  | N/A  | N/A | 0.0156         |
|                          |                                                  |                       |                    |                           |                         |                                                                                                                            | PM <sub>10</sub>                   | N/A  | N/A | 0.016          |

| PAH<br>ng/m <sup>3</sup> | Reference<br>Location                              | Measurement<br>period | Type of<br>schools | Number<br>of<br>buildings | Number<br>of<br>samples | Measurement protocol                                                                                 | Concentration (ng/m <sup>3</sup> ) |       |      |                  |
|--------------------------|----------------------------------------------------|-----------------------|--------------------|---------------------------|-------------------------|------------------------------------------------------------------------------------------------------|------------------------------------|-------|------|------------------|
|                          |                                                    |                       |                    |                           |                         |                                                                                                      | Phase                              | Min   | Max  | AM               |
| Fluoranthene             | Oliveira et al.<br>Paranhos, 2017 [55]<br>Portugal | May - June 2015       | Kindergarten       | 1                         | 88                      | 75 mm pre-cleaned PUF plugs<br>24 hours<br>38.3 L/min flow rate at 55 m <sup>3</sup> total           | Air                                | 0.04  | 2.9  | N/A              |
| Fluoranthene             | Oliveira et al. 2016<br>[36]<br>Chaves, Portugal   | May - June 2015       | Kindergarten       | 1                         | 64                      | 75 mm pre-cleaned PUF plugs<br>24 hours<br>38.3 L/min at 55 m <sup>3</sup> total                     | Air                                | 2.3   | 3.3  | N/A              |
| Fluoranthene             | Oliveira et al. 2016<br>[36]<br>Oporto, Portugal   | January-April<br>2014 | Primary<br>school  | 10                        | 60                      | 47 mm PTFE filter<br>24 hours<br>38.3 L/min at 300m <sup>3</sup> total                               | PM <sub>2.5</sub>                  | 0.06  | 7.5  | 0.008 -<br>6.1   |
| Fluoranthene             | Živković et al. 2016<br>Serbia [38]                | Heating               | Multi schools      | 4                         | 4                       | PUF Quartz filter (TSP)<br>1 week on continuous<br>38 L/min flow rate at 386 m <sup>3</sup> total    | Air                                | N/A   | N/A  | 4.47 -<br>23.39  |
| Fluoranthene             | Živković et al. 2016<br>Serbia [38]                | Non- Heating          | Multi schools      | 4                         | 4                       | PUF<br>Quartz filter (TSP)<br>1 week on continuous<br>38 L/min flow rate at 386 m <sup>3</sup> total | Air                                | N/A   | N/A  | 1.77 -<br>44.91  |
| Fluoranthene             | Raffy et al. 2017<br>France [69]                   | 2010                  | Multi schools      | 30                        | 62                      | 76 mm PUF<br>Quartz filter (TPS)<br>4.5 days<br>2.L/min flow rate at 20 m <sup>3</sup> total         | Air                                | N/A   | N/A  | N/A              |
| Fluoranthene             | Liaud et al.<br>2021 France [65]                   | April - May 2014      | High school        | 1                         | 36                      | Three-stages cascade impactors<br>HPLC/PAD/fluorescence<br>3-4 days<br>119 - 181.3 m <sup>3</sup>    | PM <sub>1</sub>                    | N/A   | N/A  | 0.0234           |
|                          |                                                    |                       |                    |                           |                         |                                                                                                      | PM <sub>2.5</sub>                  | N/A   | N/A  | 0.0324           |
|                          |                                                    |                       |                    |                           |                         |                                                                                                      | PM <sub>10</sub>                   | N/A   | N/A  | 0.0371           |
| Fluorene                 | Oliveira et al.<br>Paranhos, 2017 [55]<br>Portugal | May - June 2015       | Kindergarten       | 1                         | 88                      | 75 mm pre-cleaned PUF plugs<br>24 hours<br>38.3 L/min flow rate at 55 m <sup>3</sup> total           | Air                                | 3.7   | 23   | N/A              |
| Fluorene                 | Oliveira et al. 2016<br>[36]<br>Chaves, Portugal   | May - June 2015       | Kindergarten       | 1                         | 64                      | 75 mm pre-cleaned PUF plugs<br>24 hours<br>38.3 L/min at 55 m <sup>3</sup> total                     | Air                                | 5.1   | 14.3 | N/A              |
| Fluorene                 | Oliveira et al. 2016<br>[36]<br>Oporto, Portugal   | January-April<br>2014 | Primary<br>school  | 10                        | 60                      | 47 mm PTFE filter<br>24 hours<br>38.3 L/min at 300m <sup>3</sup> total                               | PM <sub>2.5</sub>                  | 0.003 | 0.1  | 0.006 -<br>0.08  |
| Fluorene                 | Živković et al. 2016<br>Serbia [38]                | Heating               | Multi schools      | 4                         | 4                       | PUF Quartz filter (TSP)<br>1 week on continuous                                                      | Air                                | N/A   | N/A  | 11.00 -<br>55.31 |

| PAH<br>ng/m <sup>3</sup>    | Reference<br>Location                              | Measurement<br>period | Type of<br>schools | Number<br>of<br>buildings | Number<br>of<br>samples | Measurement protocol                                                                                 | Concentration (ng/m <sup>3</sup> ) |           |        |                  |
|-----------------------------|----------------------------------------------------|-----------------------|--------------------|---------------------------|-------------------------|------------------------------------------------------------------------------------------------------|------------------------------------|-----------|--------|------------------|
|                             |                                                    |                       |                    |                           |                         |                                                                                                      | Phase                              | Min       | Max    | AM               |
|                             |                                                    |                       |                    |                           |                         | 38 L/min flow rate at 386 m <sup>3</sup> total                                                       |                                    |           |        |                  |
| Fluorene                    | Živković et al. 2016<br>Serbia [38]                | Non- Heating          | Multi schools      | 4                         | 4                       | PUF<br>Quartz filter (TSP)<br>1 week on continuous<br>38 L/min flow rate at 386 m <sup>3</sup> total | Air                                | N/A       | N/A    | 9.50 -<br>35.23  |
| Fluorene                    | Raffy et al. 2017<br>France [69]                   | 2010                  | Multi schools      | 30                        | 62                      | 76 mm PUF<br>Quartz filter (TPS)<br>4.5 days<br>2.L/min flow rate at 20 m <sup>3</sup> total         | Air                                | N/A       | N/A    | N/A              |
| Fluorene                    | Liaud et al.<br>2021 France [65]                   | April - May 2014      | High school        | 1                         | 36                      | Three-stages cascade impactors<br>HPLC/PAD/fluorescence<br>3-4 days<br>119 - 181.3 m <sup>3</sup>    | PM <sub>1</sub>                    | N/A       | N/A    | 0.0046           |
|                             |                                                    |                       |                    |                           |                         |                                                                                                      | PM <sub>2.5</sub>                  | N/A       | N/A    | 0.0124           |
|                             |                                                    |                       |                    |                           |                         |                                                                                                      | PM <sub>10</sub>                   | N/A       | N/A    | 0.0175           |
| Indeno[1,2,3-<br>c,d]pyrene | Liaud et al.<br>2021 France [65]                   | April - May 2014      | High school        | 1                         | 36                      | Three-stages cascade impactors<br>HPLC/PAD/fluorescence<br>3-4 days<br>119 - 181.3 m <sup>3</sup>    | PM <sub>1</sub>                    | N/A       | N/A    | 0.0511           |
|                             |                                                    |                       |                    |                           |                         |                                                                                                      | PM <sub>2.5</sub>                  | N/A       | N/A    | 0.0552           |
|                             |                                                    |                       |                    |                           |                         |                                                                                                      | PM <sub>10</sub>                   | N/A       | N/A    | 0.0554           |
| PAHs                        | Jovanovic et al. 2014<br>Serbia [27]               | April 2012            | Primary<br>school  | 1                         | 5                       | Quartz filter<br>192 hours<br>Average on 24 h, at a flow rate of 1.0 -<br>2.3 m <sup>3</sup> /h      | PM <sub>10</sub>                   | 1019<br>0 | 198730 | 61660            |
| Phenanthrene                | Oliveira et al.<br>Paranhos, 2017 [55]<br>Portugal | May - June 2015       | Kindergarten       | 1                         | 88                      | 75 mm pre-cleaned PUF plugs<br>24 hours<br>38.3 L/min flow rate at 55 m <sup>3</sup> total           | Air                                | 6.1       | 56.1   | N/A              |
| Phenanthrene                | Oliveira et al. 2016<br>[36]<br>Chaves, Portugal   | May - June 2015       | Kindergarten       | 1                         | 64                      | 75 mm pre-cleaned PUF plugs<br>24 hours<br>38.3 L/min at 55 m <sup>3</sup> total                     | Air                                | 25.7      | 35.3   | N/A              |
| Phenanthrene                | Oliveira et al. 2016<br>[36]<br>Oporto, Portugal   | January-April<br>2014 | Primary<br>school  | 10                        | 60                      | 47 mm PTFE filter<br>24 hours<br>38.3 L/min at 300m <sup>3</sup> total                               | PM <sub>2.5</sub>                  | 0.08      | 1      | 0.09 - 0.9       |
| Phenanthrene                | Živković et al. 2016<br>Serbia [38]                | Heating               | Multi schools      | 4                         | 4                       | PUF Quartz filter (TSP)<br>1 week on continuous<br>38 L/min flow rate at 386 m <sup>3</sup> total    | Air                                | N/A       | N/A    | 18.71 -<br>95.52 |

| PAH<br>ng/m <sup>3</sup> | Reference<br>Location                              | Measurement<br>period | Type of<br>schools | Number<br>of<br>buildings | Number<br>of<br>samples | Measurement protocol                                                                                                       | Concentration (ng/m <sup>3</sup> ) |      |     |                   |
|--------------------------|----------------------------------------------------|-----------------------|--------------------|---------------------------|-------------------------|----------------------------------------------------------------------------------------------------------------------------|------------------------------------|------|-----|-------------------|
|                          |                                                    |                       |                    |                           |                         |                                                                                                                            | Phase                              | Min  | Max | AM                |
| Phenanthrene             | Živković et al. 2016<br>Serbia [38]                | Non- Heating          | Multi schools      | 4                         | 4                       | PUF<br>Quartz filter (TSP)<br>1 week on continuous<br>38 L/min flow rate at 386 m <sup>3</sup> total                       | Air                                | N/A  | N/A | 13.98 -<br>118.71 |
| Phenanthrene             | Raffy et al. 2017<br>France [69]                   | 2010                  | Multi schools      | 30                        | 62                      | 76 mm PUF<br>Quartz filter (TPS)<br>4.5 days<br>2.L/min flow rate at 20 m <sup>3</sup> total                               | Air                                | N/A  | N/A | N/A               |
| Phenanthrene             | Krugly et al. 2014<br>Lituania [66]                | 2011-2012             | Elementary         | 5                         | 25                      | 25 mm quartz filter (pore size 1.6 µm)<br>8 hours<br>10 L/min flow rate at 0,48m <sup>3</sup> – 14 m <sup>3</sup><br>total | PM <sub>2.5</sub>                  | N/A  | 115 | N/A               |
| Phenanthrene             | Liaud et al.<br>2021 France [65]                   | April - May 2014      | High school        | 1                         | 36                      | Three-stages cascade impactors<br>HPLC/PAD/fluorescence<br>3-4 days<br>119 - 181.3 m <sup>3</sup>                          | PM <sub>1</sub>                    | N/A  | N/A | 0.0294            |
|                          |                                                    |                       |                    |                           |                         |                                                                                                                            | PM <sub>2.5</sub>                  | N/A  | N/A | 0.0638            |
|                          |                                                    |                       |                    |                           |                         |                                                                                                                            | PM <sub>10</sub>                   | N/A  | N/A | 0.0817            |
| Pyrene                   | Oliveira et al.<br>Paranhos, 2017 [55]<br>Portugal | May - June 2015       | Kindergarten       | 1                         | 88                      | 75 mm pre-cleaned PUF plugs<br>24 hours<br>38.3 L/min flow rate at 55 m <sup>3</sup> total                                 | Air                                | 0.05 | 3.7 | N/A               |
| Pyrene                   | Oliveira et al. 2016<br>[36]<br>Chaves, Portugal   | May - June 2015       | Kindergarten       | 1                         | 64                      | 75 mm pre-cleaned PUF plugs<br>24 hours<br>38.3 L/min at 55 m <sup>3</sup> total                                           | Air                                | 0.09 | 2.1 | N/A               |
| Pyrene                   | Oliveira et al. 2016<br>[36]<br>Oporto, Portugal   | January-April<br>2014 | Primary<br>school  | 10                        | 60                      | 47 mm PTFE filter<br>24 hours<br>38.3 L/min at 300m <sup>3</sup> total                                                     | PM <sub>2.5</sub>                  | 0.05 | 1.7 | 0.05 - 1,4        |
| Pyrene                   | Živković et al. 2016<br>Serbia [38]                | Heating               | Multi schools      | 4                         | 4                       | PUF Quartz filter (TSP)<br>1 week on continuous<br>38 L/min flow rate at 386 m <sup>3</sup> total                          | Air                                | N/A  | N/A | 4.06 -<br>22.19   |
| Pyrene                   | Živković et al. 2016<br>Serbia [38]                | Non- Heating          | Multi schools      | 4                         | 4                       | PUF<br>Quartz filter (TSP)<br>1 week on continuous<br>38 L/min flow rate at 386 m <sup>3</sup> total                       | Air                                | N/A  | N/A | 1.33 -<br>20.12   |
| Pyrene                   | Raffy et al. 2017<br>France [69]                   | 2010                  | Multi schools      | 30                        | 62                      | 76 mm PUF<br>Quartz filter (TPS)<br>4.5 days                                                                               | Air                                | N/A  | N/A | N/A               |

| PAH<br>ng/m <sup>3</sup> | Reference<br>Location            | Measurement<br>period | Type of<br>schools | Number<br>of<br>buildings | Number<br>of<br>samples | Measurement protocol                                                                              | Concentration (ng/m <sup>3</sup> ) |     |     |        |
|--------------------------|----------------------------------|-----------------------|--------------------|---------------------------|-------------------------|---------------------------------------------------------------------------------------------------|------------------------------------|-----|-----|--------|
|                          |                                  |                       |                    |                           |                         |                                                                                                   | Phase                              | Min | Max | AM     |
|                          |                                  |                       |                    |                           |                         | 2.L/min flow rate at 20 m <sup>3</sup> total                                                      |                                    |     |     |        |
| Pyrene                   | Liaud et al.<br>2021 France [65] | April - May 2014      | High school        | 1                         | 36                      | Three-stages cascade impactors<br>HPLC/PAD/fluorescence<br>3-4 days<br>119 - 181.3 m <sup>3</sup> | PM <sub>1</sub>                    | N/A | N/A | 0.018  |
|                          |                                  |                       |                    |                           |                         |                                                                                                   | PM <sub>2.5</sub>                  | N/A | N/A | 0.0243 |
|                          |                                  |                       |                    |                           |                         |                                                                                                   | PM <sub>10</sub>                   | N/A | N/A | 0.0269 |

**Table S16: Measurements of phthalates and musks (SVOCs) in schools across Europe and North America since 2010**

| Phthalates and musks | References Location                | Measurement period                                 | Type of schools | N° of schools | N° of samples | Measurements protocol                                                                                                                          | Phase        | Results (ng/m <sup>3</sup> ) |     |      |     |     |     |
|----------------------|------------------------------------|----------------------------------------------------|-----------------|---------------|---------------|------------------------------------------------------------------------------------------------------------------------------------------------|--------------|------------------------------|-----|------|-----|-----|-----|
|                      |                                    |                                                    |                 |               |               |                                                                                                                                                |              | Min                          | P25 | P50  | P75 | Max | AM  |
| BBP                  | Raffy et al. 2017<br>France [69]   | 2010                                               | Mixed           | 30            | 62            | Φ 76 mm polyurethane foam, with 4.5 days air pump at 2.1 L/min                                                                                 | Air          | N/A                          | N/A | 19   | N/A | N/A | N/A |
| DBP                  | Raffy et al. 2017<br>France [69]   | 2010                                               | Mixed           | 30            | 62            | Φ 76 mm polyurethane foam, with 4.5 days air pump at 2.1 L/min                                                                                 | Air          | N/A                          | N/A | 228  | N/A | N/A | N/A |
| DEHP                 | Raffy et al. 2017<br>France [69]   | 2010                                               | Mixed           | 30            | 62            | Φ 76 mm polyurethane foam, with 4.5 days air pump at 2.1 L/min                                                                                 | Air          | N/A                          | N/A | 108  | N/A | N/A | N/A |
| DEP                  | Raffy et al. 2017<br>France [69]   | 2010                                               | Mixed           | 30            | 62            | Φ 76 mm polyurethane foam, with 4.5 days air pump at 2.1 L/min                                                                                 | Air          | N/A                          | N/A | 221  | N/A | N/A | N/A |
| DIBP                 | Raffy et al. 2017<br>France [69]   | 2010                                               | Mixed           | 30            | 62            | Φ 76 mm polyurethane foam, with 4.5 days air pump at 2.1 L/min                                                                                 | Air          | N/A                          | N/A | >800 | N/A | N/A | N/A |
| DINP                 | Raffy et al. 2017<br>France [69]   | 2010                                               | Mixed           | 30            | 62            | Φ 76 mm polyurethane foam, with 4.5 days air pump at 2.1 L/min                                                                                 | Air          | N/A                          | N/A | 35   | N/A | N/A | N/A |
| Galaxolide           | Raffy et al. 2017<br>France [69]   | 2010                                               | Mixed           | 30            | 62            | Φ 76 mm polyurethane foam, with 4.5 days air pump at 2.1 L/min                                                                                 | Air          | N/A                          | N/A | >50  | N/A | N/A | N/A |
| Tonalide             | Raffy et al. 2017<br>France [69]   | 2010                                               | Mixed           | 30            | 62            | Φ 76 mm polyurethane foam, with 4.5 days air pump at 2.1 L/min                                                                                 | Air          | N/A                          | N/A | 20   | N/A | N/A | N/A |
| BBP                  | Larsson et al. 2017<br>Sweden [71] | February - April 2015<br>September – November 2015 | Kindergarten    | 100           | 100           | Cellulose filter fixed in styrene acrylonitrile container, mounted on a vacuum cleaner, Dust collected from surface 50- 250 cm above the floor | Settled dust | 0,01                         | N/A | 8,7  | 110 | 240 | 24  |
| BBP                  | Raffy et al. 2017<br>France [69]   | 2010                                               | Mixed           | 30            | 22            | Φ 76 mm polyurethane foam, with 4.5 days air pump at 2.1 L/min                                                                                 | Settled dust | N/A                          | N/A | 105  | 468 | N/A | N/A |



| Phthalates and musks | References Location             | Measurement period        | Type of schools | N° of schools | N° of samples | Measurements protocol                                                                                                                          | Phase        | Results (ng/m³) |       |      |      |        |     |
|----------------------|---------------------------------|---------------------------|-----------------|---------------|---------------|------------------------------------------------------------------------------------------------------------------------------------------------|--------------|-----------------|-------|------|------|--------|-----|
|                      |                                 |                           |                 |               |               |                                                                                                                                                |              | Min             | P25   | P50  | P75  | Max    | AM  |
| DBP                  | Larsson et al. 2017 Sweden [71] | February - April 2015     | Kindergarten    | 100           | 100           | Cellulose filter fixed in styrene acrylonitrile container, mounted on a vacuum cleaner, Dust collected from surface 50- 250 cm above the floor | Settled dust | 1,2             | N/A   | 21   | 140  | 21 000 | 250 |
|                      |                                 | September – November 2015 |                 |               |               |                                                                                                                                                |              |                 |       |      |      |        |     |
| DBP                  | Raffy et al. 2017 France [69]   | 2010                      | Mixed           | 30            | 89            | Φ 76 mm polyurethane foam, with 4.5 days air pump at 2.1 L/min                                                                                 | Settled dust | N/A             | N/A   | 38,2 | N/A  | N/A    | N/A |
| DEHP                 | Larsson et al. 2017 Sweden [71] | February - April 2015     | Kindergarten    | 100           | 99            | Cellulose filter fixed in styrene acrylonitrile container, mounted on a vacuum cleaner, Dust collected from surface 50- 250 cm above the floor | Settled dust | <0,27           | N/A   | 290  | 1900 | 4500   | 470 |
|                      |                                 | September – November 2015 |                 |               |               |                                                                                                                                                |              |                 |       |      |      |        |     |
| DEHP                 | Raffy et al. 2017 France [69]   | 2010                      | Mixed           | 30            | 28            | Φ 76 mm polyurethane foam, with 4.5 days air pump at 2.1 L/min                                                                                 | Settled dust | N/A             | N/A   | 1430 | 5830 | N/A    | N/A |
| DEP                  | Larsson et al. 2017 Sweden [71] | February - April 2015     | Kindergarten    | 100           | 100           | Cellulose filter fixed in styrene acrylonitrile container, mounted on a vacuum cleaner, Dust collected from surface 50- 250 cm above the floor | Settled dust | N/A             | <0,02 | 0,46 | 130  | 390    | 15  |
|                      |                                 | September – November 2015 |                 |               |               |                                                                                                                                                |              |                 |       |      |      |        |     |
| DEP                  | Raffy et al. 2017 France [69]   | 2010                      | Mixed           | 30            | 76            | Φ 76 mm polyurethane foam, with 4.5 days air pump at 2.1 L/min                                                                                 | Settled dust | N/A             | N/A   | 2,9  | 6,6  | N/A    | N/A |
| DIBP                 | Larsson et al. 2017 Sweden [71] | February - April 2015     | Kindergarten    | 100           | 100           | Cellulose filter fixed in styrene acrylonitrile container, mounted on a vacuum cleaner, Dust collected from                                    | Settled dust | 1               | N/A   | 6,4  | 46   | 130    | 12  |
|                      |                                 | September – November 2015 |                 |               |               |                                                                                                                                                |              |                 |       |      |      |        |     |

| Phthalates and musks | References Location             | Measurement period        | Type of schools | N° of schools | N° of samples | Measurements protocol                                                                                                                          | Phase        | Results (ng/m <sup>3</sup> ) |     |       |      |        |      |
|----------------------|---------------------------------|---------------------------|-----------------|---------------|---------------|------------------------------------------------------------------------------------------------------------------------------------------------|--------------|------------------------------|-----|-------|------|--------|------|
|                      |                                 |                           |                 |               |               |                                                                                                                                                |              | Min                          | P25 | P50   | P75  | Max    | AM   |
|                      |                                 |                           |                 |               |               |                                                                                                                                                |              |                              |     |       |      |        |      |
| DINP                 | Larsson et al. 2017 Sweden [71] | February - April 2015     | Kindergarten    | 100           | 100           | Cellulose filter fixed in styrene acrylonitrile container, mounted on a vacuum cleaner, Dust collected from surface 50- 250 cm above the floor | Settled dust | 58                           | N/A | 380   | 3400 | 66 000 | 1400 |
|                      |                                 | September – November 2015 |                 |               |               |                                                                                                                                                |              |                              |     |       |      |        |      |
| DINP                 | Raffy et al. 2017 France [69]   | 2010                      | Mixed           | 30            | 32            | Φ 76 mm polyurethane foam, with 4.5 days air pump at 2.1 L/min                                                                                 | Settled dust | N/A                          | N/A | 1030  | 4100 | N/A    | N/A  |
| Galaxolide           | Raffy et al. 2017 France [69]   | 2010                      | Mixed           | 30            | 89            | Φ 76 mm polyurethane foam, with 4.5 days air pump at 2.1 L/min                                                                                 | Settled dust | N/A                          | N/A | 0,965 | 2,2  | N/A    | N/A  |
| Tonalide             | Raffy et al. 2017 France [69]   | 2010                      | Mixed           | 30            | 89            | Φ 76 mm polyurethane foam, with 4.5 days air pump at 2.1 L/min                                                                                 | Settled dust | N/A                          | N/A | 0,337 | 0,9  | N/A    | N/A  |

**Table S17: Measurements of NO<sub>2</sub> in schools across Europe and North America since 2010**

| References<br>Location            | Type of<br>school                | Period of<br>measurement | N° of building | N° of<br>measured<br>point | Measurement<br>protocol                 | Concentration (µg/m <sup>3</sup> ) |          |          |          |      |
|-----------------------------------|----------------------------------|--------------------------|----------------|----------------------------|-----------------------------------------|------------------------------------|----------|----------|----------|------|
|                                   |                                  |                          |                |                            |                                         | Min                                | Max      | Mean     | Median   | SD   |
| Villanueva et al. 2018 Spain [61] | Kindergarten (Urban)             | February - April 2013    | 3              | 6                          | Passive sampler, 1 week on continuous   | 8.1                                | 24.9     | 4.9      | 4.32     | 2.5  |
| Villanueva et al. 2018 Spain [61] | Elementary (Urban)               | February - April 2013    | 3              | 6                          | Passive sampler, 1 week on continuous   | 1.4                                | 29.3     | 8.9      | 5.16     | 10.5 |
| Villanueva et al. 2018 Spain [61] | Kindergarten, Elementary (Rural) | February - April 2013    | 3              | 6                          | Passive sampler, 1 week on continuous   | 11.5                               | 25.2     | 19.9     | 20.8     | 5.6  |
| Villanueva et al. 2018 Spain [61] | Elementary (Rural)               | February - April 2013    | 3              | 6                          | Passive sampler, 1 week on continuous   | 7.5                                | 23.1     | 15.2     | 15.1     | 5.3  |
| Villanueva et al. 2018 Spain [61] | Kindergarten (Industrial)        | February - April 2013    | 3              | 6                          | Passive sampler, 1 week on continuous   | 5.4                                | 20.6     | 12.4     | 12.7     | 5.1  |
| Villanueva et al. 2018 Spain [61] | Elementary (Industrial)          | February - April 2013    | 3              | 6                          | Passive sampler, 1 week on continuous   | 9.8                                | 15.8     | 13.4     | 14.0     | 2.5  |
| Jovanović et al. Serbia [27]      | Elementary school                | April -2012              | 1              | 3                          | Passive sampler, 8 days on continuous   | 7,53                               | 22,45    | 15,02    | N/A      | 7,5  |
| Gaffin et al. 2018 USA [72]       | Mixed                            | 2008-2013                | 37             | 218                        | Passive sampler, 1 week on continuous   | 4.3 ppb                            | 29.7 ppb | 11.1 ppb | 10.4 ppb | N/A  |
| Rivas et al. 2014 Spain [63]      | Mixed                            | 2012 - 2013              | 39             | 39                         | Passive dosimeter, 4 days on continuous | 5,1                                | 69       | 30       | 30       | 12   |
| Csobod et al. 2014 Europe [35]    | Elementary school                | 2012                     | 114            | 300                        | Passive sampler, 5 days on continuous   | <DL                                | 88       | 14       | 11       | 9    |

| References Location                 | Type of school              | Period of measurement                | N° of building          | N° of measured point | Measurement protocol                                                | Concentration (µg/m <sup>3</sup> ) |                |                |                |              |
|-------------------------------------|-----------------------------|--------------------------------------|-------------------------|----------------------|---------------------------------------------------------------------|------------------------------------|----------------|----------------|----------------|--------------|
|                                     |                             |                                      |                         |                      |                                                                     | Min                                | Max            | Mean           | Median         | SD           |
| Csobod et al. 2014 Europe [35]      | Kindergarten                | 2012                                 | 114                     | 114                  | Passive sampler, 5 days on continuous                               | 1                                  | 60             | 14             | 12             | 8            |
| Annesi-Maesano et al. France [73]   | Elementary school           | N/A                                  | 108                     | 401                  | Passive sampler, 5 days on continuous                               | N/A                                | N/A            | 28             | 29             | 15.54        |
| Stamp et al. 2020 UK [33]           | Secondary school            | Heating and non-heating season, 2017 | 18                      | 18                   | Passive sampler, 14 days on continuous                              | 11.3                               | 42.9           | 22.1           | 20.4           | N/A          |
| Verrielle et al. 2016 France [30]   | Mixed                       | 2009 to 2013                         | 10                      | 10                   | Passive sampler, 4.5 days on continuous                             | N/A                                | N/A            | 15.3           | 18             | N/A          |
| Papadopoulos et al. 2020 Greece [5] | University                  | December                             | 1                       | 6                    | Portable Air Quality Monitor, 30 mins on continuous                 | N/A                                | N/A            | 80             | N/A            | 20           |
| Nunes et al. 2016 Portugal [56]     | Nurseries                   | April - June 2014                    | 4 schools, 8 classrooms | 12                   | Electrochemical detection, 24h on continuous                        | 0.00-98.58                         | 34.46 – 146.27 | 16.67 – 125.57 | 17.07 – 127.74 | 7.32 – 44.76 |
| Sivanantham et al. 2021 France [54] | Kindergarten and elementary | 2013 – 2017                          | 300 schools             | 67068                | Passive diffusive sampler (Triethylamine tube) 5 days on continuous | N/A                                | N/A            | 8.4            | N/A            | 0.8          |

**Table S18: Measurements of radon in schools across Europe and North America since 2010**

| References<br>Location                                     | Type of school       | Measurement<br>period                              | N° of<br>schools | N° of<br>points | Measurement protocol                                                                 | Radon concentration Bq/m <sup>3</sup> |      |                                           |           |
|------------------------------------------------------------|----------------------|----------------------------------------------------|------------------|-----------------|--------------------------------------------------------------------------------------|---------------------------------------|------|-------------------------------------------|-----------|
|                                                            |                      |                                                    |                  |                 |                                                                                      | Min                                   | Max  | AM                                        | Median    |
| A.Azara et al.,<br>2018 Italy [74]                         | Mixed                | March - July<br>2010                               | 16               | 28              | Radon detector monitor each 60<br>min, 24 time a day, 72h on<br>continuous           | N/A                                   | 1147 | N/A                                       | 92        |
| M.A.Istrate et al.,<br>2016 Romania<br>[31]                | High school          | July - August<br>2015                              | 1                | 4               | Radon semiconductor detector,<br>high voltage collection, 595<br>hours on continuous | N/A                                   | N/A  | Classroom<br>1: 320<br>Classroom<br>2: 40 | N/A       |
| Csobod et al.,<br>2014 Europe [35]                         | Elementary<br>school | November -<br>January 2012 and<br>April -June 2012 | 114              | 300             | Track count on exposed film                                                          | N/A                                   | 9190 | 205                                       | 101       |
| Csobod et al.,<br>2014 Europe [35]                         | Kindergarten         | November -<br>January 2012 and<br>April -June 2012 | 114              | 25              | Track count on exposed film                                                          | 32                                    | 9850 | 579                                       | 68        |
| K. Ivanova et al.,<br>2021 Bulgaria<br>[75]                | Elementary<br>school | September 2018 -<br>April 2019                     | 14               | 16              | RSKS type nuclear track<br>detectors                                                 | 24                                    | 995  | 169                                       | 68 ± 2.3  |
| K. Ivanova et al.,<br>2021 Bulgaria<br>[75]                | Elementary<br>school | September 2018 -<br>April 2019                     | 14               | 16              | RSKS type nuclear track<br>detectors                                                 | 42                                    | 278  | 95                                        | 88 ± 1.5  |
| K. Ivanova et al.,<br>2021 Bulgaria<br>[75]                | Elementary<br>school | September 2018 -<br>April 2019                     | 14               | 16              | RSKS type nuclear track<br>detectors                                                 | 27                                    | 211  | 774                                       | 58 ± 1.7  |
| K. Ivanova et al.,<br>2021 Bulgaria<br>[75]                | Elementary<br>school | September 2018 -<br>April 2019                     | 14               | 16              | RSKS type nuclear track<br>detectors                                                 | 224                                   | 984  | 481                                       | 471 ± 1.6 |
| K. Ivanova et al.,<br>2021 Bulgaria<br>[75]                | Elementary<br>school | September 2018 -<br>April 2019                     | 14               | 16              | RSKS type nuclear track<br>detectors                                                 | 102                                   | 995  | 326                                       | 253 ± 1.8 |
| Z.Curguz et al.,<br>2020<br>Bosnia and<br>Herzegovina [76] | Mixed                | N/A                                                | 50               | 100             | CR-39 detectors, 1 year on<br>continuous                                             | 89                                    | 4244 | 341                                       | 210       |
| Z.Curguz et al.,<br>2020                                   | Mixed                | N/A                                                | 50               | 41              | CR-39 detectors, 1 year on<br>continuous                                             | 75                                    | 655  | 165                                       | 150       |

| References<br>Location                 | Type of school                                       | Measurement<br>period         | N° of<br>schools | N° of<br>points | Measurement protocol                                                                                                | Radon concentration Bq/m <sup>3</sup> |      |      |           |
|----------------------------------------|------------------------------------------------------|-------------------------------|------------------|-----------------|---------------------------------------------------------------------------------------------------------------------|---------------------------------------|------|------|-----------|
|                                        |                                                      |                               |                  |                 |                                                                                                                     | Min                                   | Max  | AM   | Median    |
| Bosnia and Herzegovina [76]            |                                                      |                               |                  |                 |                                                                                                                     |                                       |      |      |           |
| K.Kojo et al., 2019 Finland [77]       | Daycare centers                                      | November - 2014               | 482              | 482             | Radon detector, 60 days on continuous measuring                                                                     | N/A                                   | 2426 | 86   | 40        |
| K.Kojo et al., 2019 Finland [77]       | Mixed                                                | November - 2014               | 1176             | 1176            | Radon detector, 60 days on continuous measuring                                                                     | N/A                                   | 4205 | 82   | 41        |
| P.Dhoqina et al. 2020 Albania [78]     | Mixed                                                | February - May 2014           | 30               | 37              | Solid state nuclear track detectors, 3 months exposure                                                              | 31                                    | 633  | 133  | 114 ± 113 |
| M.Müllerova et al., 2017 Hungary [79]  | Daycare centers                                      | October 2015 - March 2016     | 5                | 23              | RSKS type detectors                                                                                                 | 64                                    | 524  | 233  | 238 ± 144 |
| M.Müllerova et al., 2017 Hungary [79]  | Daycare centers                                      | October 2015 - March 2016     | 8                | 23              | TERA system detector semi-conductor, 13 days exposure                                                               | 31                                    | 200  | 90   | 73 ± 49   |
| M.Müllerova et al., 2017 Hungary [79]  | Daycare centers                                      | October 2015 - March 2016     | 7                | 21              | Radon reference monitor, 8 days exposure                                                                            | 67                                    | 1167 | 317  | 195 ± 346 |
| A.Onishchenko et al., 2017 Russia [80] | Kindergarten                                         | 2013 - 2016                   | 180              | 560             | LR-115 nuclear track detectors during 2-3 months                                                                    | N/A                                   | 620  | 59,1 | 46 ± 2.1  |
| Madureira et al., 2016 Portugal [34]   | Elementary school                                    | November - March, 2011 - 2012 | 13               | 45              | CR-39 detectors, 2 weeks on continuous                                                                              | 56                                    | 889  | 197  | 154       |
| Branco et al., 2016 Portugal [81]      | Daycare centers<br>Kindergarten<br>Elementary school | October - April               | 7                | 2429            | Radim 5B radon monitor, from 2 to 9 days continuous in daycare centers,<br>or for at least 24h in elementary school | N/A                                   | 459  | 62   | N/A       |
| Branco et al., 2016 Portugal [81]      | Daycare centers<br>Kindergarten<br>Elementary school | October - April               | 8                | 1342            | Radim 5B radon monitor, from 2 to 9 days continuous in daycare centers,<br>or for at least 24h in elementary school | N/A                                   | 888  | 193  | N/A       |

| References<br>Location                     | Type of school       | Measurement<br>period          | N° of<br>schools | N° of<br>points | Measurement protocol                                                         | Radon concentration Bq/m <sup>3</sup> |      |     |        |
|--------------------------------------------|----------------------|--------------------------------|------------------|-----------------|------------------------------------------------------------------------------|---------------------------------------|------|-----|--------|
|                                            |                      |                                |                  |                 |                                                                              | Min                                   | Max  | AM  | Median |
| D.Franci et al.,<br>2014<br>Italy [82]     | Mixed                | January 2012 -<br>January 2013 | 22               | 102             | Polyallyl diglycol carbonate<br>PADC passive detectors, 48h on<br>continuous | 17                                    | 918  | 154 | 111    |
| K.Ivanova et al.,<br>2014<br>Bulgaria [83] | Kindergarten         | February - April<br>2013       | 296              | 922             | CR-39 detectors, 3 months on<br>continuous                                   | 9                                     | 1415 | 132 | 98     |
| R.Trevisi et al.,<br>2012 Italy [84]       | Mixed                | 2010                           | 438              | N/A             | CR-39 detectors, 2 time of 6<br>months on continuous                         | 2090                                  | 1608 | 214 | 157    |
| P.Poulin et al.,<br>2012 Canada [85]       | Elementary<br>school | 2010                           | 65               | 585             | CR-39 detectors, 3 months on<br>continuous                                   | 15                                    | 663  | 56  | N/A    |

**Table S19: Measurements of illuminance (Lux) in schools in Europe and North America since 2010**

| Illuminance             | References<br>Location                    | Period<br>(years)         | Type of<br>school | Number<br>of schools | Number of<br>total samples | Shading<br>system | Measurement<br>protocol                                                                                                                                                                          | Illuminance (lux) |     |           |
|-------------------------|-------------------------------------------|---------------------------|-------------------|----------------------|----------------------------|-------------------|--------------------------------------------------------------------------------------------------------------------------------------------------------------------------------------------------|-------------------|-----|-----------|
|                         |                                           |                           |                   |                      |                            |                   |                                                                                                                                                                                                  | Min               | Max | AM ± SD   |
| Artificial              | Buratti et al.<br>2018 Italy [10]         | Spring,<br>Autumn<br>2015 | University        | 1                    | 7                          | Open              | Mavolux 5032 lux<br>meter<br>Range: 0.1 lux–<br>199.900 lux<br>f1 = 3% =<br>V(Lambda) (DIN<br>13032-1)<br>Class C<br>7 campaigns (4 in<br>Spring, 3 in Autumn)<br>4 to 9 points per<br>classroom | 74                | 453 | 251 ± 115 |
| Artificial              | Loreti et al.<br>2016 Italy [39]          | N/A                       | Secondary         | 1                    | 5                          | N/A               | Thermal microclimate<br>HD32.1                                                                                                                                                                   | 231               | 627 | 435 ± 166 |
| Artificial +<br>natural | Vilcekova et al.<br>2017 Slovakia<br>[15] | 2016                      | Elementary        | 1                    | 5                          | Open              | Testo 435-4<br>multifunctional<br>measuring device –<br>Lux probe                                                                                                                                | 53                | 413 | N/A       |

| Illuminance             | References<br>Location             | Period<br>(years) | Type of<br>school | Number<br>of schools | Number of<br>total samples | Shading<br>system | Measurement<br>protocol                                                                                                                                                                 | Illuminance (lux) |      |                |
|-------------------------|------------------------------------|-------------------|-------------------|----------------------|----------------------------|-------------------|-----------------------------------------------------------------------------------------------------------------------------------------------------------------------------------------|-------------------|------|----------------|
|                         |                                    |                   |                   |                      |                            |                   |                                                                                                                                                                                         | Min               | Max  | AM $\pm$ SD    |
|                         |                                    |                   |                   |                      |                            |                   | Range: 0 to 100,000 lx<br>f1 = 6% =<br>V(Lambda) (DIN 13032-1)<br>Class C                                                                                                               |                   |      |                |
| Artificial +<br>natural | De Giuli et al.<br>2012 Italy [22] | May 2010          | Elementary        | 1                    | 2                          | Open              | Minolta CL200 Lux<br>meter<br>Range: 0.01 to<br>299,000 lx<br>f1 < 6% =<br>V(Lambda) (DIN 13032-1)<br>Class AA<br>Measurements on<br>desks<br>Half-lights switch on<br>Sunny conditions | 366               | 2600 | 1255 $\pm$ 895 |
| Artificial +<br>natural | De Giuli et al.<br>2012 Italy [22] | May 2010          | Elementary        | 5                    | 12                         | Open              | Minolta CL20 Lux<br>meter<br>Range: 0.01 to<br>299,000 lx<br>f1 < 6% =<br>V(Lambda) (DIN 13032-1)<br>Class AA<br>Measurements on<br>desks<br>Lights switch off<br>Sunny conditions      | 47                | 4300 | 911 $\pm$ 459  |



| Illuminance             | References<br>Location             | Period<br>(years) | Type of<br>school | Number<br>of schools | Number of<br>total samples | Shading<br>system | Measurement<br>protocol                                                                                                                                                               | Illuminance (lux) |      |               |
|-------------------------|------------------------------------|-------------------|-------------------|----------------------|----------------------------|-------------------|---------------------------------------------------------------------------------------------------------------------------------------------------------------------------------------|-------------------|------|---------------|
|                         |                                    |                   |                   |                      |                            |                   |                                                                                                                                                                                       | Min               | Max  | AM $\pm$ SD   |
| Artificial +<br>natural | De Giuli et al.<br>2012 Italy [22] | May 2010          | Elementary        | 2                    | 4                          | Open              | Minolta CL20 Lux<br>meter<br>Range: 0.01 to<br>299,000 lx<br>f1 < 6% =<br>V(Lambda) (DIN<br>13032-1)<br>Class AA<br>Measurements on<br>desks<br>Lights switch on<br>Sunny conditions  | 140               | 1700 | 454 $\pm$ 289 |
| Artificial +<br>natural | De Giuli et al.<br>2012 Italy [22] | May 2010          | Elementary        | 3                    | 5                          | Half-open         | Minolta CL20 Lux<br>meter<br>Range: 0.01 to<br>299,000 lx<br>f1 < 6% =<br>V(Lambda) (DIN<br>13032-1)<br>Class AA<br>Measurements on<br>desks<br>Lights switch on<br>Sunny conditions  | 210               | 2170 | 498 $\pm$ 243 |
| Artificial +<br>natural | De Giuli et al.<br>2012 Italy [22] | May 2010          | Elementary        | 2                    | 2                          | Half-open         | Minolta CL20 Lux<br>meter<br>Range: 0.01 to<br>299,000 lx<br>f1 < 6% =<br>V(Lambda) (DIN<br>13032-1)<br>Class AA<br>Measurements on<br>desks<br>Lights switch off<br>Sunny conditions | 81                | 1500 | 351 $\pm$ 226 |

| Illuminance          | References Location             | Period (years) | Type of school | Number of schools | Number of total samples | Shading system | Measurement protocol                                                                                                                                                       | Illuminance (lux) |     |               |
|----------------------|---------------------------------|----------------|----------------|-------------------|-------------------------|----------------|----------------------------------------------------------------------------------------------------------------------------------------------------------------------------|-------------------|-----|---------------|
|                      |                                 |                |                |                   |                         |                |                                                                                                                                                                            | Min               | Max | AM $\pm$ SD   |
| Artificial + natural | De Giuli et al. 2012 Italy [22] | May 2010       | Elementary     | 1                 | 1                       | Close          | Minolta CL20 Lux meter<br>Range: 0.01 to 299,000 lx<br>f1 < 6% = V(Lambda) (DIN 13032-1)<br>Class AA<br>Measurements on desks<br>Lights switch half-on<br>Sunny conditions | 440               | 820 | 637 $\pm$ 126 |
| Artificial + natural | De Giuli et al. 2012 Italy [22] | May 2010       | Elementary     | 1                 | 1                       | Half - Open    | Minolta CL20 Lux meter<br>Range :0.01 to 299,000 lx<br>f1 < 6% = V(Lambda) (DIN 13032-1)<br>Class AA<br>Measurements on desks<br>Lights switch half-on<br>Sunny conditions | 150               | 390 | 473 $\pm$ 100 |
| Artificial + natural | De Giuli et al. 2012 Italy [22] | May 2010       | Elementary     | 1                 | 1                       | Close          | Minolta CL20 Lux meter<br>Range: 0.01 to 299,000 lx<br>f1 < 6% = V(Lambda) (DIN 13032-1)<br>Class AA<br>Measurements on desks<br>Lights switch half-on<br>Sunny conditions | 140               | 460 | 303 $\pm$ 79  |

| Illuminance          | References Location             | Period (years) | Type of school | Number of schools | Number of total samples | Shading system                   | Measurement protocol                                                                                                          | Illuminance (lux)                              |      |           |
|----------------------|---------------------------------|----------------|----------------|-------------------|-------------------------|----------------------------------|-------------------------------------------------------------------------------------------------------------------------------|------------------------------------------------|------|-----------|
|                      |                                 |                |                |                   |                         |                                  |                                                                                                                               | Min                                            | Max  | AM ± SD   |
| Artificial + natural | De Giuli et al. 2014 Italy [19] | March 2012     | Elementary     | 1                 | 4                       | 2 Close<br>2 Half-Open           | Measurements on desks                                                                                                         | Minimum illuminance < 300 lux                  |      |           |
| Artificial + natural | De Giuli et al. 2014 Italy [19] | April 2012     | Elementary     | 1                 | 4                       | 1 Open<br>3 Half-Open            | Measurements on desks                                                                                                         | Mean illuminance > 300 lux.                    |      |           |
| Artificial + natural | De Giuli et al. 2014 Italy [19] | May 2012       | Elementary     | 1                 | 4                       | 4 Half - Open                    | Measurements on desks                                                                                                         | Minimum illuminance < 300 lux                  |      |           |
| Artificial + natural | De Giuli et al. 2014 Italy [19] | June 2012      | Elementary     | 1                 | 4                       | 1 Open<br>3 Half-Open            | Measurements on desks                                                                                                         | Minimum illuminance < 300 lux recommendations. |      |           |
| Artificial + natural | De Giuli et al. 2015 Italy [17] | February 2011  | Elementary     | 3                 | 8                       | 4 Open<br>4 Half-Open            | Minolta CL20 Lux meter<br>Range: 0.01 to 299,000 lx<br>f1 < 6% = V(Lambda) (DIN 13032-1)<br>Class AA<br>Measurements on desks | 95                                             | 1940 | 546 ± 303 |
| Artificial + natural | De Giuli et al. 2015 Italy [17] | April 2011     | Elementary     | 3                 | 8                       | 3 Close<br>2 Half-Open<br>3 Open | Minolta CL20 Lux meter<br>Range: 0.01 to 299,000 lx<br>f1 < 6% = V(Lambda) (DIN 13032-1)<br>Class AA<br>Measurements on desks | 48                                             | 2000 | 542 ± 318 |

| Illuminance          | References Location                 | Period (years) | Type of school        | Number of schools | Number of total samples | Shading system        | Measurement protocol                                                                                                                                         | Illuminance (lux) |       |                                                                |
|----------------------|-------------------------------------|----------------|-----------------------|-------------------|-------------------------|-----------------------|--------------------------------------------------------------------------------------------------------------------------------------------------------------|-------------------|-------|----------------------------------------------------------------|
|                      |                                     |                |                       |                   |                         |                       |                                                                                                                                                              | Min               | Max   | AM ± SD                                                        |
| Artificial + natural | De Giuli et al. 2015 Italy [17]     | June 2011      | Elementary            | 3                 | 8                       | 7 Open<br>1 Half-Open | Minolta CL20 Lux meter<br>Range:0.01 to 299,000 lx<br>f1 < 6% = V(Lambda) (DIN 13032-1)<br>Class AA<br>Measurements on desks                                 | 197               | 2011  | 631 ± 328                                                      |
| Total                | Rucinska et al. 2020 Poland [86]    | 2018 - 2019    | University            | 1                 | 319                     | Open                  | Testo 545 illuminance meter<br>Range: 0 to 100,000 lx<br>f1 = 6% = V(Lambda) (DIN 13032-1)<br>Class C<br>Several days at different hours<br>Sunny conditions | 189               | 38757 | 8206 ± 9114                                                    |
| Total                | Rucinska et al. 2020 Poland [86]    | 2018 - 2019    | University            | 1                 | 319                     | Open                  | Testo 545 illuminance meter<br>Range:0 to 100,000 lx<br>f1 = 6% = V(Lambda) (DIN 13032-1)<br>Class C<br>Cloudy conditions                                    | 27                | 616   | 169 ± 132                                                      |
| Artificial           | Harcarova et al. 2020, Slovakia [3] | 2020           | Elementary            | 1                 | 2                       | N/A                   | Testo 545 illuminance meter at 1.1 meters                                                                                                                    | N/A               | N/A   | 364<br>1122                                                    |
| Total                | Laborda et al. 2020, Spain [2]      | 2018           | Secondary High school | 8                 | 282                     | N/A                   | PCE-134 lux-meter                                                                                                                                            | N/A               | N/A   | Range: 461 – 560 with a SD of 222<br>Lighting uniformity: 0.48 |

| Illuminance | References<br>Location                | Period<br>(years) | Type of<br>school | Number<br>of schools | Number of<br>total samples | Shading<br>system | Measurement<br>protocol                             | Illuminance (lux) |     |         |
|-------------|---------------------------------------|-------------------|-------------------|----------------------|----------------------------|-------------------|-----------------------------------------------------|-------------------|-----|---------|
|             |                                       |                   |                   |                      |                            |                   |                                                     | Min               | Max | AM ± SD |
| Total       | Leccese et al.<br>2020, Italy [87]    | 2020              | University        | 1                    | 1                          | Yes/no            | Illuminance meter<br>RadioLux 1111 PRC<br>Krochmann | N/A               | N/A | 847     |
| Daylight    | Baloch et al.<br>2021, Europe<br>[88] | 2011-<br>2012     | Elementary        | 115                  | 319                        | Yes/no            | N/A                                                 | N/A               | N/A | N/A     |

## 2 Figures

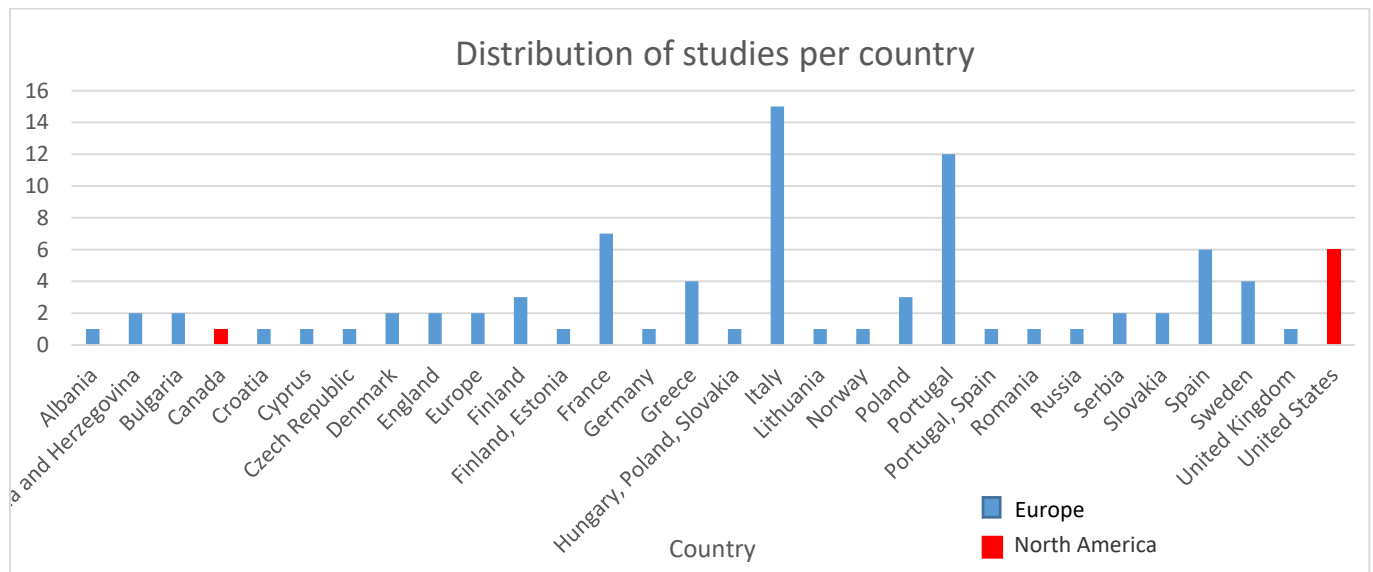

Figure S1: Distribution of studies per country (n=88)

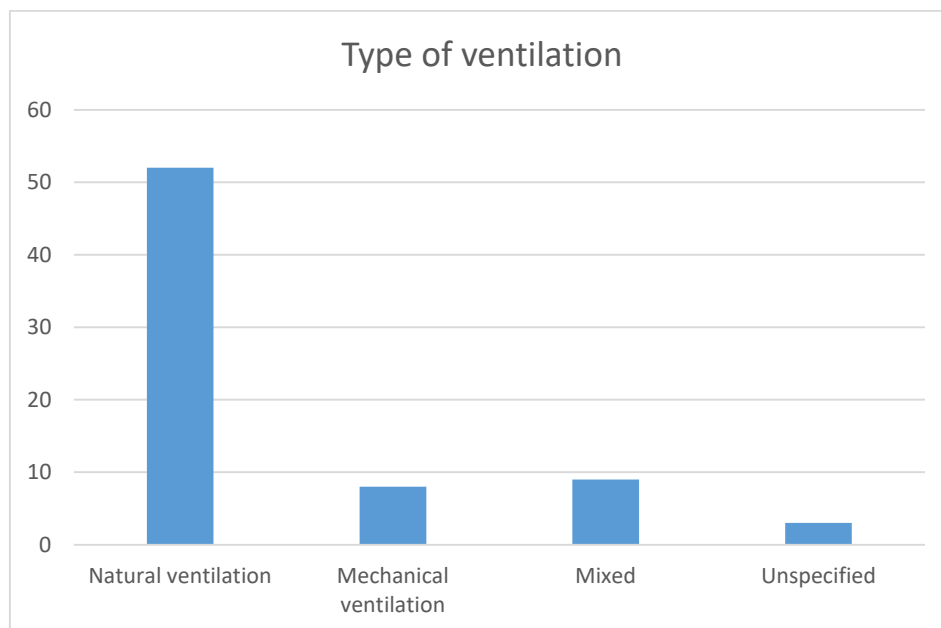

Figure S2: Types of ventilation in reviewed studies

## 3 References

1. Aguilar, A.J.; de la Hoz-Torres, M.L.; Martínez-Aires, M.D.; Ruiz, D.P. Thermal Perception in Naturally Ventilated University Buildings in Spain during the Cold Season. *Buildings* **2022**, *12*, doi:10.3390/buildings12070890.
2. Campano-Laborda, M.Á.; Domínguez-Amarillo, S.; Fernández-Agüera, J.; Acosta, I.

- Indoor Comfort and Symptomatology in Non-University Educational Buildings: Occupants' Perception. *Atmosphere (Basel)*. **2020**, *11*, doi:10.3390/atmos11040357.
3. Harčárová, K. Indoor Air Quality in Classrooms of a Newly Built School. *IOP Conf. Ser. Mater. Sci. Eng.* **2020**, *867*, doi:10.1088/1757-899X/867/1/012008.
  4. Langer, S.; Ekberg, L.; Teli, D.; Cabovska, B.; Bekö, G.; Wargocki, P. Study of the Measured and Perceived Indoor Air Quality in Swedish School Classrooms. *IOP Conf. Ser. Earth Environ. Sci.* **2020**, *588*, doi:10.1088/1755-1315/588/3/032070.
  5. Papadopoulos, G.; Panaras, G.; Tolis, E. Thermal Comfort and Indoor Air Quality Assessment in University Classrooms. *IOP Conf. Ser. Earth Environ. Sci.* **2020**, *410*, doi:10.1088/1755-1315/410/1/012095.
  6. Ahmed, K.; Kuusk, K.; Heininen, H.; Arumägi, E.; Kalamees, T.; Hasu, T.; Lolli, N.; Kurnitski, J. Indoor Climate and Energy Performance in Nearly Zero Energy Day Care Centers and School Buildings. *E3S Web Conf.* **2019**, *111*, doi:10.1051/e3sconf/201911102003.
  7. Brdarić, D.; Capak, K.; Gvozdić, V.; Barišin, A.; Jelinić, J.D.; Egorov, A.; Šapina, M.; Kalambura, S.; Kramarić, K. Indoor Carbon Dioxide Concentrations in Croatian Elementary School Classrooms during the Heating Season. *Arh. Hig. Rada Toksikol.* **2019**, *70*, 296–302, doi:10.2478/aiht-2019-70-3343.
  8. Papazoglou, E.; Moustris, K.P.; Nikas, K.S.P.; Nastos, P.T.; Statharas, J.C. Assessment of Human Thermal Comfort Perception in a Non-Air-Conditioned School Building in Athens, Greece. *Energy Procedia* **2019**, *157*, 1343–1352, doi:10.1016/j.egypro.2018.11.299.
  9. Simanic, B.; Nordquist, B.; Bagge, H.; Johansson, D. Indoor Air Temperatures, CO<sub>2</sub> Concentrations and Ventilation Rates: Long-Term Measurements in Newly Built Low-Energy Schools in Sweden. *J. Build. Eng.* **2019**, *25*, 100827, doi:10.1016/j.jobbe.2019.100827.
  10. Buratti, C.; Belloni, E.; Merli, F.; Ricciardi, P. A New Index Combining Thermal, Acoustic, and Visual Comfort of Moderate Environments in Temperate Climates. *Build. Environ.* **2018**, *139*, 27–37, doi:10.1016/j.buildenv.2018.04.038.
  11. Vornanen-Winqvist, C.; Järvi, K.; Andersson, M.A.; Duchaine, C.; Létourneau, V.; Kedves, O.; Kredics, L.; Mikkola, R.; Kurnitski, J.; Salonen, H. Exposure to Indoor Air Contaminants in School Buildings with and without Reported Indoor Air Quality Problems. *Environ. Int.* **2020**, *141*, doi:10.1016/j.envint.2020.105781.
  12. Vornanen-Winqvist, C.; Salonen, H.; Järvi, K.; Andersson, M.A.; Mikkola, R.; Marik, T.; Kredics, L.; Kurnitski, J. Effects of Ventilation Improvement on Measured and Perceived Indoor Air Quality in a School Building with a Hybrid Ventilation System. *Int. J. Environ. Res. Public Health* **2018**, *15*, doi:10.3390/ijerph15071414.
  13. Zečević, N.; Husika, A.; Džaferović, E. Impact of Energy Efficiency Measures on Indoor Air Quality in Building of Mechanical Engineering Faculty Sarajevo. *Ann. DAAAM Proc. Int. DAAAM Symp.* **2018**, *29*, 0197–0201, doi:10.2507/29th.daaam.proceedings.028.
  14. Irulegi, O.; Serra, A.; Hernández, R. Data on Records of Indoor Temperature and Relative Humidity in a University Building. *Data Br.* **2017**, *13*, 248–252, doi:10.1016/j.dib.2017.05.029.
  15. Vilcekova, S.; Meciariova, L.; Burdova, E.K.; Katunska, J.; Kosicanova, D.; Doroudiani, S. Indoor Environmental Quality of Classrooms and Occupants' Comfort in a Special Education School in Slovak Republic. *Build. Environ.* **2017**, *120*, 29–40, doi:10.1016/j.buildenv.2017.05.001.
  16. Branco, P.T.B.S.; Alvim-Ferraz, M.C.M.; Martins, F.G.; Sousa, S.I.V. Children's Exposure to Indoor Air in Urban Nurseries-Part I: CO<sub>2</sub> and Comfort Assessment.

- Environ. Res.* **2015**, *140*, 1–9, doi:10.1016/j.envres.2015.03.007.
17. De Giuli, V.; Zecchin, R.; Corain, L.; Salmaso, L. Measurements of Indoor Environmental Conditions in Italian Classrooms and Their Impact on Childrens Comfort. *Indoor Built Environ.* **2015**, *24*, 689–712, doi:10.1177/1420326X14530586.
  18. Pereira, L.D.; Cardoso, E.; Da Silva, M.G. Indoor Air Quality Audit and Evaluation on Thermal Comfort in a School in Portugal. *Indoor Built Environ.* **2015**, *24*, 256–268, doi:10.1177/1420326X13508966.
  19. De Giuli, V.; Zecchin, R.; Corain, L.; Salmaso, L. Measured and Perceived Environmental Comfort: Field Monitoring in an Italian School. *Appl. Ergon.* **2014**, *45*, 1035–1047, doi:10.1016/j.apergo.2014.01.004.
  20. Dias Pereira, L.; Raimondo, D.; Corgnati, S.P.; Gameiro da Silva, M. Assessment of Indoor Air Quality and Thermal Comfort in Portuguese Secondary Classrooms: Methodology and Results. *Build. Environ.* **2014**, *81*, 69–80, doi:10.1016/j.buildenv.2014.06.008.
  21. Alves, C.; Nunes, T.; Silva, J.; Duarte, M. Comfort Parameters and Particulate Matter (PM<sub>10</sub> and PM<sub>2.5</sub>) in School Classrooms and Outdoor Air. *Aerosol Air Qual. Res.* **2013**, *13*, 1521–1535, doi:10.4209/aaqr.2012.11.0321.
  22. De Giuli, V.; Da Pos, O.; De Carli, M. Indoor Environmental Quality and Pupil Perception in Italian Primary Schools. *Build. Environ.* **2012**, *56*, 335–345, doi:10.1016/j.buildenv.2012.03.024.
  23. Haverinen-Shaughnessy, U.; Shaughnessy, R.J.; Cole, E.C.; Toyinbo, O.; Moschandreas, D.J. An Assessment of Indoor Environmental Quality in Schools and Its Association with Health and Performance. *Build. Environ.* **2015**, *93*, 35–40, doi:10.1016/j.buildenv.2015.03.006.
  24. Toftum, J.; Kjeldsen, B.U.; Wargocki, P.; Menå, H.R.; Hansen, E.M.N.; Clausen, G. Association between Classroom Ventilation Mode and Learning Outcome in Danish Schools. *Build. Environ.* **2015**, *92*, 494–503, doi:10.1016/j.buildenv.2015.05.017.
  25. Erlandson, G.; Magzamen, S.; Carter, E.; Sharp, J.L.; Reynolds, S.J.; Schaeffer, J.W. Characterization of Indoor Air Quality on a College Campus: A Pilot Study. *Int. J. Environ. Res. Public Health* **2019**, *16*, 17–26, doi:10.3390/ijerph16152721.
  26. Canha, N.; Mandin, C.; Ramalho, O.; Wyart, G.; Ribéron, J.; Dassonville, C.; Hänninen, O.; Almeida, S.M.; Derbez, M. Assessment of Ventilation and Indoor Air Pollutants in Nursery and Elementary Schools in France. *Indoor Air* **2016**, *26*, 350–365, doi:10.1111/ina.12222.
  27. Jovanović, M.; Vučićević, B.; Turanjanin, V.; Živković, M.; Spasojević, V. Investigation of Indoor and Outdoor Air Quality of the Classrooms at a School in Serbia. *Energy* **2014**, *77*, 42–48, doi:10.1016/j.energy.2014.03.080.
  28. Senitkova, I.J. Occurrence of Indoor VOCs in Nursery School - Case Study. In Proceedings of the IOP Conference Series: Materials Science and Engineering; Institute of Physics Publishing, November 4 2017; Vol. 245.
  29. Barmeparesos, N.; Assimakopoulos, M.N.; Assimakopoulos, V.D.; Loumos, N.; Sotiriou, M.A.; Koukoumtzis, A. Indoor Air Quality and Thermal Conditions in a Primary School with a Green Roof System. *Atmosphere (Basel)*. **2018**, *9*, doi:10.3390/atmos9020075.
  30. Verrielle, M.; Schoemaecker, C.; Hanoune, B.; Leclerc, N.; Germain, S.; Gaudion, V.; Locoge, N. The MERMAID Study: Indoor and Outdoor Average Pollutant Concentrations in 10 Low-Energy School Buildings in France. *Indoor Air* **2016**, *26*, 702–713, doi:10.1111/ina.12258.
  31. Istrate, M.A.; Catalina, T.; Cucos, A.; Dicu, T. Experimental Measurements of VOC and Radon in Two Romanian Classrooms. *Energy Procedia* **2016**, *85*, 288–294,



- doi:10.1016/j.egypro.2015.12.254.
32. Zhong, L.; Su, F.C.; Batterman, S. Volatile Organic Compounds (VOCs) in Conventional and High Performance School Buildings in the U.S. *Int. J. Environ. Res. Public Health* **2017**, *14*, doi:10.3390/ijerph14010100.
  33. Stamp, S.; Burman, E.; Shrubsole, C.; Chatzidiakou, L.; Mumovic, D.; Davies, M. Long-Term, Continuous Air Quality Monitoring in a Cross-Sectional Study of Three UK Non-Domestic Buildings. *Build. Environ.* **2020**, *180*, 107071, doi:10.1016/j.buildenv.2020.107071.
  34. Madureira, J.; Paciência, I.; Rufo, J.; Ramos, E.; Barros, H.; Teixeira, J.P.; de Oliveira Fernandes, E. Indoor Air Quality in Schools and Its Relationship with Children's Respiratory Symptoms. *Atmos. Environ.* **2015**, *118*, 145–156, doi:10.1016/j.atmosenv.2015.07.028.
  35. Csobod, É.; Annesi-Maesano, I.; Carrer, P.; Kephelopoulou, S.; Madureira, J.; Rudnai, P.; de Oliveira Fernandes, E. Schools Indoor Pollution & Health Observatory Network in Europe SINPHONIE. **2014**, doi:10.2788/99220.
  36. Oliveira, M.; Slezakova, K.; Delerue-Matos, C.; Pereira, M.D.C.; Morais, S. Assessment of Polycyclic Aromatic Hydrocarbons in Indoor and Outdoor Air of Preschool Environments (3-5 Years Old Children). *Environ. Pollut.* **2016**, *208*, 382–394, doi:10.1016/j.envpol.2015.10.004.
  37. Oliveira, M.; Slezakova, K.; Madureira, J.; de Oliveira Fernandes, E.; Delerue-Matos, C.; Morais, S.; do Carmo Pereira, M. Polycyclic Aromatic Hydrocarbons in Primary School Environments: Levels and Potential Risks. *Sci. Total Environ.* **2017**, *575*, 1156–1167, doi:10.1016/j.scitotenv.2016.09.195.
  38. Živković, M.; Jovašević-Stojanović, M.; Cvetković, A.; Lazović, I.; Tasić, V.; Stevanović, Ž.; Gržetić, I. PAHs Levels in Gas and Particle-Bound Phase in Schools at Different Locations in Serbia. *Chem. Ind. Chem. Eng. Q.* **2015**, *21*, 159–167, doi:10.2298/CICEQ140206016Z.
  39. Loreti, L.; Barbaresi, L.; De Cesaris, S.; Garai, M. Overall Indoor Quality of a Non-Renewed Secondary-School Building. *Build. Acoust.* **2016**, *23*, 47–58, doi:10.1177/1351010X16637533.
  40. de la Hoz-Torres, M.L.; Aguilar, A.J.; Costa, N.; Arezes, P.; Ruiz, D.P.; Martínez-Aires, M.D. Reopening Higher Education Buildings in Post-Epidemic COVID-19 Scenario: Monitoring and Assessment of Indoor Environmental Quality after Implementing Ventilation Protocols in Spain and Portugal. *Indoor Air* **2022**, *32*, 1–19, doi:10.1111/ina.13040.
  41. Heracleous, C.; Michael, A. Experimental Assessment of the Impact of Natural Ventilation on Indoor Air Quality and Thermal Comfort Conditions of Educational Buildings in the Eastern Mediterranean Region during the Heating Period. *J. Build. Eng.* **2019**, *26*, 100917, doi:10.1016/j.job.2019.100917.
  42. Korsavi, S.S.; Montazami, A. Developing a Valid Method to Study Adaptive Behaviours with Regard to IEQ in Primary Schools. *Build. Environ.* **2019**, *153*, 1–16, doi:10.1016/j.buildenv.2019.02.018.
  43. Oldham, E.; Kim, H. IEQ Field Investigation in High-Performance, Urban Elementary Schools. *Atmosphere (Basel)*. **2020**, *11*, 1–25, doi:10.3390/ATMOS11010081.
  44. Fabbri, K. Thermal Comfort Evaluation in Kindergarten: PMV and PPD Measurement through Datalogger and Questionnaire. *Build. Environ.* **2013**, *68*, 202–214, doi:10.1016/j.buildenv.2013.07.002.
  45. Smith, K. Explorations of Acoustic Trends in Data Logged in K-12 Classrooms. **2019**.
  46. Chetoni, M.; Ascari, E.; Bianco, F.; Fredianelli, L.; Licitra, G.; Cori, L. Global Noise Score Indicator for Classroom Evaluation of Acoustic Performances in LIFE

- GIOCONDA Project. *Noise Mapp.* **2016**, 3, 157–171, doi:10.1515/noise-2016-0012.
47. Russo, D.; Ruggiero, A. Choice of the Optimal Acoustic Design of a School Classroom and Experimental Verification. *Appl. Acoust.* **2019**, 146, 280–287, doi:10.1016/j.apacoust.2018.11.019.
  48. Sarantopoulos, G.; Lykoudis, S.; Kassomenos, P. Noise Levels in Primary Schools of Medium Sized City in Greece. *Sci. Total Environ.* **2014**, 482–483, 493–500, doi:10.1016/j.scitotenv.2013.09.010.
  49. Mikulski, W.; Radosz, J. Acoustics of Classrooms in Primary Schools - Results of the Reverberation Time and the Speech Transmission Index Assessments in Selected Buildings. *Arch. Acoust.* **2011**, 36, 777–793, doi:10.2478/V10168-011-0052-6.
  50. Kristiansen, J.; Lund, S.P.; Nielsen, P.M.; Persson, R.; Shibuya, H. Determinants of Noise Annoyance in Teachers from Schools with Different Classroom Reverberation Times. *J. Environ. Psychol.* **2011**, 31, 383–392, doi:10.1016/j.jenvp.2011.08.005.
  51. Klatte, M.; Hellbroock, J. *Effects of Classroom Acoustics on Performance and Wellbeing in Elementary School Children: A Field Study*; 2010; Vol. 42; ISBN 9781617823961.
  52. Shield, B.; Conetta, R.; Dockrell, J.; Connolly, D.; Cox, T.; Mydlarz, C. A Survey of Acoustic Conditions and Noise Levels in Secondary School Classrooms in England. *J. Acoust. Soc. Am.* **2015**, 137, 177–188, doi:10.1121/1.4904528.
  53. Becerra, J.A.; Lizana, J.; Gil, M.; Barrios-Padura, A.; Blondeau, P.; Chacartegui, R. Identification of Potential Indoor Air Pollutants in Schools. *J. Clean. Prod.* **2020**, 242, doi:10.1016/j.jclepro.2019.118420.
  54. Sivanantham, S.; Dassonville, C.; Grégoire, A.; Malingre, L.; Ramalho, O.; Mandin, C. Coexposure to Indoor Pollutants in French Schools and Associations with Building Characteristics. *Energy Build.* **2021**, 252, doi:10.1016/j.enbuild.2021.111424.
  55. Oliveira, M.; Slezakova, K.; Delerue-Matos, C.; do Carmo Pereira, M.; Morais, S. Assessment of Exposure to Polycyclic Aromatic Hydrocarbons in Preschool Children: Levels and Impact of Preschool Indoor Air on Excretion of Main Urinary Monohydroxyl Metabolites. *J. Hazard. Mater.* **2017**, 322, 357–369, doi:10.1016/j.jhazmat.2016.10.004.
  56. Nunes, R.A.O.; Branco, P.T.B.S.; Alvim-Ferraz, M.C.M.; Martins, F.G.; Sousa, S.I.V. Gaseous Pollutants on Rural and Urban Nursery Schools in Northern Portugal. *Environ. Pollut.* **2016**, 208, 2–15, doi:10.1016/j.envpol.2015.07.018.
  57. Mainka, A.; Zajusz-Zubek, E. Indoor Air Quality in Urban and Rural Preschools in Upper Silesia, Poland: Particulate Matter and Carbon Dioxide. *Int. J. Environ. Res. Public Health* **2015**, 12, 7697–7711, doi:10.3390/ijerph120707697.
  58. Ramalho, O.; Wyart, G.; Mandin, C.; Blondeau, P.; Cabanes, P.A.; Leclerc, N.; Mullot, J.U.; Boulanger, G.; Redaelli, M. Association of Carbon Dioxide with Indoor Air Pollutants and Exceedance of Health Guideline Values. *Build. Environ.* **2015**, 93, 115–124, doi:10.1016/j.buildenv.2015.03.018.
  59. Rovelli, S.; Cattaneo, A.; Nuzzi, C.P.; Spinazzè, A.; Piazza, S.; Carrer, P.; Cavallo, D.M. Airborne Particulate Matter in School Classrooms of Northern Italy. *Int. J. Environ. Res. Public Health* **2014**, 11, 1398–1421, doi:10.3390/ijerph110201398.
  60. Branco, P.T.B.S.; Nunes, R.A.O.; Alvim-Ferraz, M.C.M.; Martins, F.G.; Sousa, S.I.V. Children's Exposure to Indoor Air in Urban Nurseries - Part II: Gaseous Pollutants' Assessment. *Environ. Res.* **2015**, 142, 662–670, doi:10.1016/j.envres.2015.08.026.
  61. Villanueva, F.; Tapia, A.; Lara, S.; Amo-Salas, M. Indoor and Outdoor Air Concentrations of Volatile Organic Compounds and NO<sub>2</sub> in Schools of Urban, Industrial and Rural Areas in Central-Southern Spain. *Sci. Total Environ.* **2018**, 622–623, 222–235, doi:10.1016/j.scitotenv.2017.11.274.

62. de Gennaro, G.; Farella, G.; Marzocca, A.; Mazzone, A.; Tutino, M. Indoor and Outdoor Monitoring of Volatile Organic Compounds in School Buildings: Indicators Based on Health Risk Assessment to Single out Critical Issues. *Int. J. Environ. Res. Public Health* **2013**, *10*, 6273–6291, doi:10.3390/ijerph10126273.
63. Rivas, I.; Viana, M.; Moreno, T.; Pandolfi, M.; Amato, F.; Reche, C.; Bouso, L.; Álvarez-Pedrerol, M.; Alastuey, A.; Sunyer, J.; et al. Child Exposure to Indoor and Outdoor Air Pollutants in Schools in Barcelona, Spain. *Environ. Int.* **2014**, *69*, 200–212, doi:10.1016/j.envint.2014.04.009.
64. Slezakova, K.; de Oliveira Fernandes, E.; Pereira, M. do C. Assessment of Ultrafine Particles in Primary Schools: Emphasis on Different Indoor Microenvironments. *Environ. Pollut.* **2019**, *246*, 885–895, doi:10.1016/j.envpol.2018.12.073.
65. Liaud, C.; Chouvinc, S.; Le Calvé, S. Simultaneous Monitoring of Particle-Bound PAHs inside a Low-Energy School Building and Outdoors over Two Weeks in France. *Atmosphere (Basel)*. **2021**, *12*, doi:10.3390/atmos12010108.
66. Krugly, E.; Martuzevicius, D.; Sidaraviciute, R.; Ciuzas, D.; Prasauskas, T.; Kauneliene, V.; Stasiulaitiene, I.; Kliucininkas, L. Characterization of Particulate and Vapor Phase Polycyclic Aromatic Hydrocarbons in Indoor and Outdoor Air of Primary Schools. *Atmos. Environ.* **2014**, *82*, 298–306, doi:10.1016/j.atmosenv.2013.10.042.
67. Cequier, E.; Ionas, A.C.; Covaci, A.; Marcé, R.M.; Becher, G.; Thomsen, C. Occurrence of a Broad Range of Legacy and Emerging Flame Retardants in Indoor Environments in Norway. *Environ. Sci. Technol.* **2014**, *48*, 6827–6835, doi:10.1021/es500516u.
68. Persson, J.; Wang, T.; Hagberg, J. Organophosphate Flame Retardants and Plasticizers in Indoor Dust, Air and Window Wipes in Newly Built Low-Energy Preschools. *Sci. Total Environ.* **2018**, *628–629*, 159–168, doi:10.1016/j.scitotenv.2018.02.053.
69. Raffy, G.; Mercier, F.; Blanchard, O.; Derbez, M.; Dassonville, C.; Bonvallot, N.; Glorennec, P.; Le Bot, B. Semi-Volatile Organic Compounds in the Air and Dust of 30 French Schools: A Pilot Study. *Indoor Air* **2017**, *27*, 114–127, doi:10.1111/ina.12288.
70. Romagnoli, P.; Balducci, C.; Perilli, M.; Gherardi, M.; Gordiani, A.; Gariazzo, C.; Gatto, M.P.; Cecinato, A. Indoor PAHs at Schools, Homes and Offices in Rome, Italy. *Atmos. Environ.* **2014**, *92*, 51–59, doi:10.1016/j.atmosenv.2014.03.063.
71. Larsson, K.; Lindh, C.H.; Jönsson, B.A.; Giovanoulis, G.; Bibi, M.; Bottai, M.; Bergström, A.; Berglund, M. Phthalates, Non-Phthalate Plasticizers and Bisphenols in Swedish Preschool Dust in Relation to Children's Exposure. *Environ. Int.* **2017**, *102*, 114–124, doi:10.1016/j.envint.2017.02.006.
72. Gaffin, J.M.; Hauptman, M.; Petty, C.R.; Sheehan, W.J.; Lai, P.S.; Wolfson, J.M.; Gold, D.R.; Coull, B.A.; Koutrakis, P.; Phipatanakul, W. Nitrogen Dioxide Exposure in School Classrooms of Inner-City Children with Asthma. *J. Allergy Clin. Immunol.* **2018**, *141*, 2249–2255.e2, doi:10.1016/j.jaci.2017.08.028.
73. Annesi-Maesano, I.; Hulin, M.; Lavaud, F.; Raheison, C.; Kopferschmitt, C.; De Blay, F.; Charpin, D.A.; Denis, C. Poor Air Quality in Classrooms Related to Asthma and Rhinitis in Primary Schoolchildren of the French 6 Cities Study. *Thorax* **2012**, *67*, 682–688, doi:10.1136/thoraxjnl-2011-200391.
74. Azara, A.; Dettori, M.; Castiglia, P.; Piana, A.; Durando, P.; Parodi, V.; Salis, G.; Saderi, L.; Sotgiu, G. Indoor Radon Exposure in Italian Schools. *Int. J. Environ. Res. Public Health* **2018**, *15*, doi:10.3390/ijerph15040749.
75. Ivanova, K.; Stojanovska, Z.; Djunakova, D.; Djounova, J. Analysis of the Spatial Distribution of the Indoor Radon Concentration in School's Buildings in Plovdiv Province, Bulgaria. *Build. Environ.* **2021**, *204*, doi:10.1016/j.buildenv.2021.108122.
76. Curguz, Z.; Venoso, G.; Zunic, Z.S.; Mirjanic, D.; Ampollini, M.; Carpentieri, C.; Di

- Carlo, C.; Caprio, M.; Alavantic, D.; Kolarz, P.; et al. Spatial Variability of Indoor Radon Concentration in Schools: Implications on Radon Measurement Protocols. *Radiat. Prot. Dosimetry* **2020**, *191*, 133–137, doi:10.1093/rpd/ncaa137.
77. Kojo, K.; Kurttio, P. Indoor Radon Measurements in Finnish Daycare Centers and Schools-Enforcement of the Radiation Act. *Int. J. Environ. Res. Public Health* **2020**, *17*, doi:10.3390/ijerph17082877.
  78. Dhoqina, P.; Tushe, K.; Xhixha, G.; Daci, B.; Bylyku, E. Measurements of Indoor Radon Concentrations in Schools in Some Cities of North Albania. In Proceedings of the AIP Conference Proceedings; American Institute of Physics Inc., February 26 2019; Vol. 2075.
  79. Müllerová, M.; Mazur, J.; Csordás, A.; Grzadziel, D.; Holý, K.; Kovács, T.; Kozak, K.; Kureková, P.; Nagy, E.; Neznal, M.; et al. Preliminary Results of Radon Survey in the Kindergartens of V4 Countries. *Radiat. Prot. Dosimetry* **2017**, *177*, 95–98, doi:10.1093/rpd/ncx155.
  80. Onishchenko, A.; Malinovsky, G.; Vasilyev, A.; Zhukovsky, M. Radon Measurements in Kindergartens in Ural Region (Russia). *Radiat. Prot. Dosimetry* **2017**, *177*, 112–115.
  81. Branco, P.T.B.S.; Nunes, R.A.O.; Alvim-Ferraz, M.C.M.; Martins, F.G.; Sousa, S.I.V. Children's Exposure to Radon in Nursery and Primary Schools. *Int. J. Environ. Res. Public Health* **2016**, *13*, doi:10.3390/ijerph13040386.
  82. Franci, D.; Aureli, T. Long- and Short-Term Indoor Radon Survey in the Ardea Municipality, South Rome. *Radiat. Prot. Dosimetry* **2014**, *162*, 625–629, doi:10.1093/rpd/ncu025.
  83. Ivanova, K.; Stojanovska, Z.; Tsenova, M.; Badulin, V.; Kunovska, B. Measurement of Indoor Radon Concentration in Kindergartens in Sofia, Bulgaria. *Radiat. Prot. Dosimetry* **2014**, *162*, 163–166, doi:10.1093/rpd/ncu251.
  84. Trevisi, R.; Leonardi, F.; Simeoni, C.; Tonnarini, S.; Veschetti, M. Indoor Radon Levels in Schools of South-East Italy. *J. Environ. Radioact.* **2012**, *112*, 160–164, doi:10.1016/j.jenvrad.2012.05.030.
  85. Poulin, P.; Leclerc, J.M.; Dessau, J.C.; Deck, W.; Gagnon, F. Radon Measurement in Schools Located in Three Priority Investigation Areas in the Province of Quebec, Canada. *Radiat. Prot. Dosimetry* **2012**, *151*, 278–289, doi:10.1093/rpd/ncr483.
  86. Rucińska, J.; Trzaski, A. Measurements and Simulation Study of Daylight Availability and Its Impact on the Heating, Cooling and Lighting Energy Demand in an Educational Building. *Energies* **2020**, *13*, doi:10.3390/en13102555.
  87. Leccese, F.; Salvadori, G.; Rocca, M.; Buratti, C.; Belloni, E. A Method to Assess Lighting Quality in Educational Rooms Using Analytic Hierarchy Process. *Build. Environ.* **2020**, *168*, doi:10.1016/j.buildenv.2019.106501.
  88. Baloch, R.M.; Maesano, C.N.; Christoffersen, J.; Mandin, C.; Csobod, E.; De, E.; Fernandes, O.; Annesi-Maesano, I. Daylight and School Performance in European Schoolchildren. *Public Health* **2021**, *18*, doi:10.3390/ijerph.
